# Supplementary material for: Analysis of bowel function, urogenital function, and long-term follow-up outcomes associated with robotic and laparoscopic sphincter-preserving surgical approaches to total mesorectal excision in low rectal cancer: a retrospective cohort study
Source: World J Surg Oncol. 2022 May 27;20:167. doi: 10.1186/s12957-022-02631-0 (PMC9137207; doi:10.1186/s12957-022-02631-0)
Supplement: Supplementary file 1 — Additional file 1. [file 12957_2022_2631_MOESM1_ESM.xlsx]

## Sheet: 工作表1
Surgical approach	name	IPSS score（1，0~7 score；2，8~19 score；3，20~35 score）												Wexner score
		Pre-operation		Postoperative 1 month		Postoperative 3 month		Postoperative 6 month		Postoperative 12 month		Postoperative 24 month		Pre-operation	Postoperative 6 month	Postoperative 12 month	Postoperative 24 month
0,laparoscopic approach 1,robotic approach
1	吴明政	1	1	3	1	2	1	1	1	1	1	1	1	0	0	0	0
1	方有元	1	1	3	1	2	1	1	1	1	1	1	1	0	0	0	0
1	张奎	1	1	4	1	3	1	2	1	1	1	1	1	0	0	0	0
1	胡敬霞	2	1	4	1	3	1	2	1	2	1	2	1	0	0	0	0
1	谢振彬	2	1	4	1	3	1	2	1	2	1	2	1	0	0	0	0
1	郑景全	3	1	6	1	5	1	4	1	3	1	3	1	0	0	0	0
1	李玲	4	1	7	1	6	1	5	1	4	1	4	1	0	0	0	0
1	孔德平	4	1	8	2	6	1	6	1	5	1	4	1	0	0	0	0
1	冯秀英	5	1	9	2	8	1	6	1	5	1	5	1	0	0	0	0
1	段子亮	2	1	3	1	2	1	2	1	2	1	2	1	0	0	0	0
1	陈可方	3	1	7	1	5	1	4	1	3	1	3	1	0	0	0	0
1	韩德玉	4	1	8	2	6	1	5	1	4	1	4	1	0	0	0	0
1	聂忠华	2	1	3	1	2	1	2	1	2	1	2	1	0	1	0	0
1	高峰	2	1	4	1	3	1	3	1	3	1	2	1	0	1	0	0
1	朱家宝	1	1	3	1	2	1	1	1	1	1	1	1	0	0	0	0
1	张吉平	3	1	6	1	5	1	4	1	3	1	3	1	0	0	0	0
1	张卫兵	3	1	6	1	5	1	3	1	3	1	3	1	0	0	0	0
1	陶余庭	3	1	6	1	5	1	3	1	3	1	3	1	0	0	0	0
1	高治中	3	0	7	1	5	1	5	1	4	1	3	1	0	0	0	0
1	王世明	4	1	7	1	5	1	4	1	4	1	4	1	0	0	0	0
1	董光峰	4	1	8	1	5	1	5	1	5	1	4	1	0	0	0	0
1	张吉萍	4	1	8	1	6	1	5	1	4	1	4	1	0	0	0	0
1	胡玉勤	4	1	8	2	7	2	5	1	4	1	4	1	0	0	0	0
1	景浩洲	4	1	9	2	7	1	5	1	4	1	4	1	0	0	0	0
1	许长英	4	1	9	2	8	1	6	1	4	1	4	1	0	0	0	0
1	王家珍	4	1	9	2	8	1	6	1	4	1	4	1	0	0	0	0
1	石玉贵	4	1	9	2	8	1	6	1	4	1	4	1	0	0	0	0
1	李树敏	5	1	9	2	8	1	6	1	5	1	5	1	0	0	0	0
1	胡学灿	5	1	9	2	8	2	7	1	5	1	5	1	0	0	0	0
1	沈乃荣	6	1	10	2	8	1	7	1	6	1	6	1	0	0	0	0
1	李国平	2	1	4	1	3	1	2	1	2	1	2	1	0	0	0	0
1	郑家辉	3	1	5	1	5	1	3	1	3	1	3	1	0	0	0	0
1	蔡宝兰	3	1	6	1	5	1	4	1	4	1	3	1	0	0	0	0
1	谢晓华	3	1	7	1	5	1	6	1	4	1	3	1	0	0	0	0
1	汤新备	4	1	8	1	6	1	6	1	5	1	4	1	0	0	0	0
1	李祥艮	4	1	9	2	8	1	6	1	4	1	4	1	0	0	0	0
1	林辉	0	1	4	1	3	1	2	1	0	1	0	1	0	1	0	0
1	汪宏兵	1	1	4	1	3	1	2	1	1	1	1	1	0	1	0	0
1	刘小梅	1	1	4	1	3	1	2	1	1	1	1	1	0	1	0	0
1	王小流	2	1	5	1	4	1	3	1	2	1	2	1	0	1	0	0
1	孙金花	2	1	5	1	4	1	4	1	2	1	2	1	0	1	0	0
1	林敏	3	1	6	1	5	1	3	1	3	1	3	1	0	1	0	0
1	王家桂	4	1	6	1	5	1	5	1	4	1	4	1	0	1	0	0
1	储成方	3	1	7	1	6	1	5	1	3	1	3	1	0	1	0	0
1	丁毛娥	7	1	10	2	8	2	7	1	7	1	7	1	0	1	0	0
1	张桂兰	3	1	6	1	5	1	4	1	3	1	3	1	0	1	1	0
1	陈存菊	3	1	7	1	5	1	5	1	4	1	3	1	0	1	1	0
1	樊传洋	3	1	7	1	5	2	5	1	4	1	4	1	0	1	1	0
1	祁学美	5	1	9	2	8	2	7	2	5	1	5	1	0	2	1	0
1	夏宏发	4	1	7	1	5	1	5	1	4	1	4	1	0	1	1	0
1	崔兴华	3	1	8	2	5	1	5	1	4	1	4	1	0	1	1	0
1	汤义侠	4	1	8	2	7	1	5	1	4	1	4	1	0	1	1	0
1	左家分	5	1	9	2	8	1	6	1	5	1	5	1	0	1	1	0
1	黄明仁	6	1	10	2	9	2	7	1	6	1	6	1	0	1	1	0
1	项以和	7	1	11	2	9	2	8	1	7	1	7	1	0	1	1	0
1	袁双印	2	1	6	1	5	1	4	1	2	1	2	1	0	1	1	0
1	李庆芹	3	1	7	1	5	1	5	1	4	1	3	1	0	1	1	0
1	丁腊梅	3	1	7	1	5	1	5	1	4	1	3	1	0	1	1	0
1	陈主发	5	1	9	2	7	1	6	1	5	1	5	1	0	1	1	0
1	王立岚	2	1	4	1	3	1	2	1	3	1	2	1	0	2	1	0
1	邓艳萍	2	1	4	1	3	1	3	1	2	1	2	1	0	2	1	0
1	高峰	4	1	6	1	5	1	4	1	4	1	4	1	0	2	1	0
1	蔡存芝	3	1	7	1	6	1	5	1	3	1	3	1	0	2	1	0
1	郑章宝	4	1	7	1	5	1	6	1	4	1	4	1	0	2	1	0
1	班胜琴	4	1	9	2	8	1	6	1	5	1	5	1	0	2	1	0
1	刘敏华	2	1	4	1	3	1	2	1	2	1	2	1	0	2	1	0
1	范江红	2	1	5	1	4	1	3	1	2	1	2	1	0	2	1	0
1	张德秀	5	1	9	2	8	1	6	1	5	1	5	1	0	2	1	0
1	丁祖新	4	1	8	1	6	1	5	1	4	1	4	1	1	2	1	0
1	钱丽娟	1	1	3	1	2	1	1	1	1	1	1	1	0	0	0	0
1	刘小连	6	1	9	2	8	1	6	1	5	1	6	1	0	0	0	0
1	王前付	4	1	7	1	6	1	6	1	4	1	4	1	0	0	0	0
1	姚新良	4	1	7	1	5	1	5	1	4	1	4	1	0	0	0	0
1	吴瑞林	5	1	8	1	5	1	6	1	5	1	5	1	0	0	0	0
1	汤玉如	4	1	9	2	8	2	6	1	4	1	4	1	0	0	0	0
1	胡起英	5	1	9	2	8	2	6	1	5	1	5	1	0	0	0	0
1	韩仁海	5	1	9	2	8	2	6	1	5	1	5	1	0	0	0	0
1	胡德玉	6	1	9	2	8	2	6	1	6	1	6	1	0	0	0	0
1	尹若根	6	1	9	2	8	1	7	1	6	9	6	1	0	0	0	0
1	叶勤会	6	1	10	2	8	1	8	1	7	1	7	1	0	0	0	0
1	汤桂姐	4	1	9	2	8	1	7	1	4	1	4	1	0	0	0	0
1	何世华	2	1	3	1	2	1	1	1	2	1	2	1	0	1	0	0
1	李治东	3	1	5	1	4	1	4	1	3	1	3	1	0	1	0	0
1	孔维平	3	1	5	1	5	1	4	1	3	1	3	1	0	1	0	0
1	王玉树	3	1	6	1	5	1	4	1	4	1	3	1	0	1	0	0
1	李郑霞	3	1	6	1	5	1	5	1	4	1	4	1	0	1	0	0
1	陶满胜	1	1	3	1	2	1	1	1	1	1	1	1	0	1	0	0
1	储秀珍	2	1	4	1	3	1	2	1	2	1	2	1	0	1	0	0
1	李道军	2	1	5	1	4	1	3	1	3	1	3	1	0	1	0	0
1	李其花	2	1	5	1	4	1	3	1	2	1	2	1	0	1	0	0
1	李家年	3	1	5	1	5	1	3	1	3	1	3	1	0	1	0	0
1	黄开应	3	1	6	1	5	1	3	1	3	1	3	1	0	1	0	0
1	朱利民	3	1	7	1	5	1	4	1	3	1	3	1	0	1	0	0
1	孙本莲	4	1	9	2	7	1	6	1	5	1	5	1	0	1	0	0
1	魏明兰	4	1	9	2	7	1	6	1	4	1	4	1	0	1	0	0
1	曹传兴	6	1	9	2	8	2	6	2	6	1	6	1	0	1	0	0
1	马多浩	6	1	9	2	8	2	7	2	6	1	6	1	0	1	0	0
1	刘炳付	0	1	3	1	2	1	1	1	0	1	0	1	0	2	0	0
1	卞新萍	2	1	4	1	3	1	3	1	2	1	2	1	0	0	0	0
1	陈良珍	3	1	7	1	5	1	5	1	4	1	3	1	0	0	0	0
1	赵宜保	3	1	7	1	6	1	6	1	4	1	3	1	0	0	0	0
1	许秀林	4	1	8	1	6	1	6	1	5	1	4	1	0	0	0	0
1	孔令凤	4	1	8	1	6	1	5	1	4	1	4	1	0	0	0	0
1	吴廷友	4	1	8	1	6	2	5	1	4	1	4	1	0	0	0	0
1	李永久	5	1	9	2	8	1	6	1	5	1	5	1	0	0	0	0
1	赵其昌	7	1	10	2	9	2	8	1	7	1	7	1	0	0	0	0
1	胡申付	1	1	5	1	4	1	3	1	2	1	2	1	0	0	0	0
1	琚炳超	4	1	6	1	5	1	4	1	4	1	4	1	0	0	0	0
1	陈庭梅	5	1	9	2	7	1	5	1	5	1	5	1	0	0	0	0
1	陈国芳	4	1	6	1	5	1	4	1	4	1	4	1	0	1	0	0
1	李于杰	6	1	11	2	10	1	9	1	6	1	6	1	1	1	0	0
1	朱少学	5	1	8	2	6	2	5	1	5	1	5	1	0	1	1	0
1	钟家友	4	1	9	2	7	2	5	1	4	1	4	1	0	1	1	0
1	张东发	2	1	6	1	5	2	4	1	3	1	3	1	0	1	1	0
1	王安平	3	1	6	1	5	1	4	1	4	1	3	1	0	1	1	0
1	张天山	4	1	8	1	6	1	6	1	4	1	4	1	0	1	1	0
1	赵宜胜	4	1	8	2	7	1	5	1	5	1	4	1	0	1	1	0
1	卓林珍	4	1	9	2	7	2	6	1	4	1	4	1	0	1	1	0
1	张玉粉	5	1	9	2	8	1	6	1	5	1	5	1	0	1	1	0
1	王秀英	5	1	9	2	8	1	7	1	6	1	5	1	0	1	1	0
1	陈传芳	6	1	9	2	8	1	6	1	6	1	6	1	0	1	1	0
1	付自强	6	1	9	2	8	2	6	2	6	1	6	1	1	1	1	0
1	谢四平	3	1	7	1	5	1	5	1	4	1	4	1	0	2	1	0
1	吴自宏	2	1	2	1	1	2	1	1	2	1	2	1	0	2	1	0
1	王仲玉	2	1	4	1	3	1	3	1	2	1	2	1	0	2	1	0
1	罗保荣	3	1	6	1	5	1	4	1	3	1	3	1	0	2	1	0
1	王绍福	3	1	7	1	5	1	4	1	4	1	4	1	0	2	1	0
1	张法海	5	1	9	2	8	1	6	1	5	1	5	1	0	2	1	0
1	孙亚伯	6	1	10	2	9	2	7	1	6	1	6	1	0	2	1	0
1	赵元伦	8	2	11	2	8	2	8	2	8	2	8	2	1	2	1	0
1	朱方其	5	1	9	2	7	2	6	2	5	1	5	1	0	1	1	0
1	张彩侠	6	1	9	2	8	2	6	1	6	1	6	1	0	1	1	0
1	谈正国	5	1	10	2	8	2	7	2	6	1	6	1	0	1	1	0
1	张洁影	2	1	5	1	4	1	4	1	2	1	2	1	0	1	1	0
1	陈传芳	5	1	9	2	8	1	6	1	5	1	5	1	0	1	1	0
1	朱仕银	3	1	5	1	5	1	3	1	3	1	3	1	0	2	1	0
1	蒋爱云	4	1	8	2	7	1	5	1	4	1	4	1	0	2	1	0
1	赵陈氏	4	1	9	2	7	1	5	1	5	1	4	1	0	2	1	0
1	吴小琼	0	1	3	1	2	1	1	1	0	1	0	1	0	2	1	0
1	毕得翠	3	1	7	1	5	1	5	1	4	1	3	1	0	2	1	0
1	许霭华	5	1	9	2	8	1	6	1	6	1	5	1	1	2	1	0
1	李世普	7	1	10	2	9	2	9	2	8	2	7	1	0	2	1	0
1	廖国林	3	1	7	1	6	1	6	1	5	1	4	1	0	1	1	0
1	于中文	3	1	7	1	5	1	5	1	4	1	4	1	0	2	1	0
1	王彩花	5	1	9	2	8	1	6	1	5	1	5	1	0	3	2	0
1	张多伍	2	1	4	1	3	1	2	1	2	1	2	1	0	3	2	0
1	杨义生	3	1	6	1	5	2	4	1	3	1	3	1	0	3	2	0
1	姚香枝	3	1	5	1	4	1	3	1	3	1	3	1	0	0	0	0
1	高小文	3	1	7	1	5	1	5	1	4	1	4	1	0	0	0	0
1	宋华伦	5	1	9	2	8	1	6	1	5	1	5	1	0	0	0	0
1	李士平	4	1	9	2	8	1	6	1	5	1	4	1	0	0	0	0
1	张中祥	3	1	6	1	5	1	4	1	4	1	4	1	0	1	1	0
1	李新	2	1	6	1	5	1	3	1	2	1	2	1	0	1	1	0
1	费维柱	2	1	5	1	4	1	4	1	2	1	2	1	0	2	1	0
1	程顺华	6	1	10	2	8	2	7	1	6	1	6	1	1	2	1	1
1	董克英	5	1	9	2	7	1	5	1	5	1	5	1	0	1	1	1
1	柴助学	3	1	6	1	5	1	4	1	4	1	3	1	0	1	1	1
1	唐永为	4	1	9	2	7	1	6	1	5	1	5	1	0	1	1	1
1	刘福陵	5	1	9	2	8	1	6	1	5	1	5	1	1	2	2	1
1	李跃树	5	1	9	2	8	2	7	2	6	1	6	1	1	2	2	1
1	王本和	5	1	9	2	8	2	6	1	5	1	5	1	1	2	2	1
1	孔玲	5	1	9	2	8	2	6	2	5	1	5	1	0	3	3	1
1	汪要娟	2	1	5	1	4	1	4	1	3	1	2	1	0	3	3	1
1	柴树修	8	2	11	2	10	2	9	2	8	2	8	2	1	2	2	1
1	汪国珍	5	1	9	2	7	2	5	1	5	1	5	1	1	2	2	1
1	夏培然	8	2	11	2	9	2	8	2	8	2	8	2	0	3	2	1
1	宋贤柱	6	1	10	2	9	2	7	1	6	1	6	1	0	2	2	1
1	张建	4	1	8	2	5	1	5	1	4	1	4	1	0	3	3	1
1	游家才	5	1	9	2	7	1	5	1	5	1	5	1	0	3	3	1
0	张广华	1	1	3		2	1	1	1	1	1	1	1	0	0	0	0
0	马连雨	0	1	3		2	1	2	1	1	1	0	1	0	0	0	0
0	藕春荣	1	1	3		3	1	2	1	1	1	1	1	0	0	0	0
0	方彬	1	1	3		2	1	2	1	1	1	1	1	0	0	0	0
0	郝淑平	1	1	3		3	1	2	1	1	1	1	1	0	0	0	0
0	王纯东	2	1	5		5	1	4	1	2	1	3	1	0	0	0	0
0	郑向东	2	1	6		5	1	4	1	2	1	2	1	0	0	0	0
0	江明	2	1	6		5	1	5	1	2	1	5	1	0	0	0	0
0	张英	2	1	6		5	1	5	1	2	1	2	1	0	0	0	0
0	张银美	2	1	6		6	1	5	1	2	1	2	1	0	0	0	0
0	陆玉荣	2	1	6		6	1	5	1	2	1	2	1	0	0	0	0
0	龚义霞	2	1	5		5	1	5	1	2	1	2	1	0	0	0	0
0	吴国银	3	1	6		5	1	5	1	3	1	3	1	0	0	0	0
0	张本云	3	1	6		6	1	5	1	3	1	3	1	0	0	0	0
0	刘向东	3	1	6		5	1	5	1	3	1	3	1	0	0	0	0
0	赵春强	3	1	7		6	1	5	1	3	1	3	1	0	0	0	0
0	李光树	3	1	7		7	1	5	1	3	1	3	1	0	0	0	0
0	范和平	4	1	7		6	1	6	1	4	1	4	1	0	0	0	0
0	苏光凤	4	1	7		6	1	6	1	4	1	4	1	0	0	0	0
0	刘贵珍	4	1	7		6	1	6	1	4	1	4	1	0	0	0	0
0	陈敬东	4	1	8		8	1	6	1	4	1	4	1	0	0	0	0
0	康克仕	4	1	8		8	1	6	1	6	1	4	1	0	0	0	0
0	缪东生	6	1	10		8	1	6	1	6	1	6	1	0	0	0	0
0	祝海燕	0	1	3		2	1	1	1	1	1	0	1	0	0	0	0
0	祁军	3	1	7		7	1	4	1	3	1	3	1	0	0	0	0
0	方泽玉	3	1	6		5	1	4	1	3	1	3	1	0	0	0	0
0	张德照	3	1	7		6	1	4	1	3	1	3	1	0	0	0	0
0	孔令秀	3	1	7		7	1	5	1	4	1	3	1	0	0	0	0
0	尹雷	4	1	8		8	1	7	1	5	1	4	1	0	0	0	0
0	郭树森	6	1	10		10	2	7	1	8	1	6	1	0	0	0	0
0	张社权	0	1	2		1	1	1	1	1	1	0	1	0	0	0	0
0	杨芳	2	1	5		4	1	3	1	2	1	2	1	0	0	0	0
0	葛江红	2	1	5		4	1	3	1	2	1	2	1	0	0	0	0
0	严志来	2	1	6		4	1	3	1	2	1	2	1	0	0	0	0
0	李云英	2	1	5		5	1	3	1	2	1	2	1	0	0	0	0
0	周克云	2	1	6		5	1	4	1	2	1	2	1	0	0	0	0
0	陈满华	2	1	6		5	1	4	1	2	1	3	1	0	0	0	0
0	覃小会	2	1	5		4	1	4	1	2	1	2	1	0	0	0	0
0	未文明	3	1	7		7	1	6	1	3	1	3	1	0	1	0	0
0	查达培	3	1	7		7	1	4	1	4	1	3	1	0	1	0	0
0	吴广江	4	1	7		6	1	4	1	4	1	4	1	0	1	0	0
0	魏长云	4	1	7		6	1	4	1	4	1	4	1	0	1	0	0
0	王炳里	3	1	6		6	1	5	1	4	1	3	1	0	1	0	0
0	冯玉存	3	1	7		6	2	6	2	4	2	3	1	0	1	0	0
0	张晓明	4	1	7		7	1	6	1	4	1	4	1	0	1	0	0
0	王德珍	6	1	10		8	1	6	1	6	1	6	1	0	1	0	0
0	范瑞顶	6	1	9		8	1	6	1	6	1	6	1	0	1	0	0
0	吕金华	6	1	10		9	1	6	1	6	1	6	1	0	1	0	0
0	黄永侠	8	1	11		10	1	8	1	8	1	8	1	0	1	0	0
0	何金龙	1	1	3		2	1	2	1	2	1	2	1	0	1	0	0
0	汪爱华	2	1	5		4	1	3	1	2	1	2	1	0	1	0	0
0	左从英	2	1	5		3	1	3	1	2	1	2	1	0	1	0	0
0	司守青	2	1	6		5	1	4	1	2	1	2	1	0	1	0	0
0	朱明霞	2	1	5		4	1	4	1	2	1	2	1	0	1	0	0
0	马文	2	1	6		6	1	5	1	2	1	2	1	0	1	0	0
0	郭怀礼	3	1	7		7	1	5	1	3	1	3	1	0	1	0	0
0	余鸿浩	3	1	6		5	1	5	1	3	1	3	1	0	1	0	0
0	蒋翠兰	6	1	10		8	1	6	1	5	1	6	1	0	1	0	0
0	张克英	6	1	10		8	1	6	1	6	1	6	1	0	1	0	0
0	谈宜华	6	1	9		8	1	6	1	6	1	6	1	0	1	0	0
0	吴灿兵	6	1	9		8	1	6	1	6	1	6	1	0	1	0	0
0	马德山	6	1	10		10	1	7	1	7	1	6	1	0	1	0	0
0	李家荣	2	1	5		4	1	3	1	2	1	2	1	0	2	0	0
0	丁希学	2	1	6		6	1	4	1	2	1	3	0	0	2	0	0
0	朱长娥	0	1	3		3	1	2	1	1	1	0	1	0	0	0	0
0	孟进根	1	1	3		2	1	2	1	1	1	1	1	0	0	0	0
0	张毛才	1	1	3		3	1	2	1	1	1	1	1	0	0	0	0
0	李四壹	1	1	4		2	1	2	1	1	1	1	1	0	0	0	0
0	潘晓飞	2	1	6		6	1	5	1	2	1	2	1	0	0	0	0
0	伍德兰	2	1	6		6	1	5	1	2	1	2	1	0	0	0	0
0	刘玉龙	2	1	6		5	1	4	1	3	1	3	1	0	0	0	0
0	王兆仙	3	1	7		7	1	4	1	3	1	3	1	0	0	0	0
0	陈新民	3	1	7		7	1	5	1	3	1	3	1	0	0	0	0
0	刘道海	3	1	7		6	1	5	1	3	1	3	1	0	0	0	0
0	陈方枝	3	1	7		6	1	5	1	3	1	3	1	0	0	0	0
0	程保年	3	1	7		6	1	5	1	3	1	3	1	0	0	0	0
0	谭赛平	3	1	6		6	1	5	1	4	1	3	1	0	0	0	0
0	袁之树	3	1	7		7	1	5	1	4	1	3	1	0	0	0	0
0	孙守云	4	1	7		7	1	6	1	4	1	4	1	0	0	0	0
0	汪为玲	4	1	7		6	1	6	1	4	1	4	1	0	0	0	0
0	胡云士	4	1	7		7	1	6	1	4	1	4	1	0	0	0	0
0	徐维贤	4	1	8		7	1	6	1	4	1	4	1	0	0	0	0
0	胡月华	3	1	7		7	1	6	1	4	1	3	1	0	0	0	0
0	李振琴	4	1	9		8	1	7	1	4	1	4	1	0	0	0	0
0	余明水	4	1	8		7	1	7	1	4	1	4	1	0	0	0	0
0	武放兵	4	1	8		8	1	7	1	5	1	4	1	0	0	0	0
0	王玉爱	5	1	9		8	1	7	1	5	1	5	1	0	0	0	0
0	梁庭栋	5	1	8		8	1	7	1	6	1	5	1	0	0	0	0
0	王万福	5	1	9		8	1	7	1	6	1	5	1	0	0	0	0
0	陶金芝	5	1	9		8	1	7	1	6	1	5	1	0	0	0	0
0	王成芝	6	1	10		8	1	6	1	6	1	6	1	0	0	0	0
0	马明闩	6	1	9		8	1	6	1	6	1	6	1	0	0	0	0
0	方向辉	6	1	10		9	1	6	1	6	1	6	1	0	0	0	0
0	张锡祥	6	1	10		8	2	6	2	6	1	6	1	0	0	0	0
0	李帮明	7	1	11		10	1	7	1	7	1	7	1	0	0	0	0
0	陈立奎	7	1	11		10	2	7	2	7	1	7	1	0	0	0	0
0	雷芹修	5	1	9		8	1	7	1	5	1	5	1	0	0	0	0
0	张尧艾	5	1	8		7	1	6	1	6	1	5	1	0	0	0	0
0	屠国云	2	1	5		4	1	4	1	2	1	2	1	0	1	0	0
0	苏建平	2	1	5		5	1	4	1	2	1	2	1	0	1	0	0
0	路前岳	2	1	5		5	1	4	1	2	1	2	1	0	1	0	0
0	韩延社	2	1	5		5	1	4	1	2	1	2	1	0	1	0	0
0	王万明	2	1	6		5	1	4	1	2	1	3	1	0	1	0	0
0	王修保	2	1	6		5	1	4	1	2	1	2	1	0	1	0	0
0	马建芳	2	1	5		4	1	4	1	2	1	2	1	0	1	0	0
0	李明	2	1	5		5	1	4	1	2	1	3	1	0	1	0	0
0	胡伟栋	3	1	6		5	1	4	1	3	1	3	1	0	1	0	0
0	秦金枝	3	1	6		6	1	4	1	3	1	3	1	0	1	0	0
0	于玖琳	3	1	6		5	1	4	1	3	1	3	1	0	1	0	0
0	何平	2	1	6		5	1	5	1	3	1	2	1	0	1	0	0
0	张维英	3	1	7		6	1	5	1	3	1	3	1	0	1	0	0
0	王志成	3	1	7		6	1	5	1	3	1	3	1	0	1	0	0
0	崔良运	3	1	6		5	1	5	1	3	1	3	1	0	1	0	0
0	余道香	4	1	7		6	1	6	1	4	1	4	1	0	1	0	0
0	姚祥梅	6	1	10		10	1	7	1	6	1	6	1	0	1	0	0
0	何宏绪	4	1	7		7	1	6	1	4	1	4	1	0	1	0	0
0	刘小波	0	1	2		1	1	1	1	1	1	0	1	0	1	1	0
0	袁永菊	2	1	5		4	1	4	1	3	1	2	1	0	1	1	0
0	曹之植	3	1	6		4	1	4	1	3	1	3	1	0	1	1	0
0	张世芹	3	1	6		6	1	4	1	3	1	3	1	0	1	1	0
0	程贞文	3	1	7		6	1	4	1	3	1	3	1	0	1	1	0
0	江中建	3	1	6		5	1	4	1	3	1	3	1	0	1	1	0
0	王桂明	3	1	7		6	1	4	1	3	1	3	1	0	1	1	0
0	朱余田	3	1	6		5	1	4	1	3	1	3	1	0	1	1	0
0	侯树珍	3	1	7		7	1	4	1	3	1	3	1	0	1	1	0
0	操旺胜	2	1	6		6	1	5	1	3	1	2	1	0	1	1	0
0	许成余	3	1	6		6	1	5	1	3	1	3	1	0	1	1	0
0	魏如群	3	1	7		7	1	5	1	3	1	3	1	0	1	1	0
0	胡清华	3	1	6		5	1	5	1	3	1	3	1	0	1	1	0
0	徐礼旺	3	1	7		7	1	5	1	3	1	3	1	0	1	1	0
0	黄振兴	4	1	8		7	2	7	2	4	1	4	1	0	1	1	0
0	朱庆宝	5	1	9		8	1	7	1	5	1	5	1	0	1	1	0
0	蒋召新	5	1	9		8	1	7	1	6	1	5	1	0	1	1	0
0	贾月荣	5	1	9		8	1	7	1	6	1	5	1	0	1	1	0
0	杨文凤	2	1	5		4	1	3	1	2	1	2	1	0	2	1	0
0	方少云	3	1	6		6	1	4	1	3	1	3	1	0	2	1	0
0	施友礼	6	1	9		8	1	5	1	5	1	6	1	0	2	1	0
0	胡明秀	5	1	9		8	1	7	1	5	1	5	1	0	2	1	0
0	李玉玲	5	1	9		8	1	7	1	6	1	5	1	0	2	1	0
0	吴玉凯	5	1	9		8	1	7	1	6	1	5	1	0	2	1	0
0	赵道友	5	1	10		8	1	7	1	6	1	5	1	0	2	1	0
0	吴君福	7	1	11		9	2	6	1	6	1	7	1	0	2	1	0
0	胡家贵	6	1	10		10	2	7	2	6	1	6	1	0	2	1	0
0	彭望远	7	1	10		9	2	7	2	7	1	7	1	0	2	1	0
0	叶宝书	7	1	11		10	2	7	2	7	2	7	1	0	2	1	0
0	陈仕英	7	1	10		10	2	8	2	7	1	7	1	0	2	1	0
0	叶圣竹	3	1	7		6	1	5	1	3	1	3	1	0	2	1	0
0	汤芬朝	3	1	6		5	1	5	1	3	1	3	1	0	2	1	0
0	王秀玲	6	1	9		8	1	6	1	5	1	6	1	0	2	1	0
0	何传高	6	1	10		8	2	6	1	6	1	6	1	0	2	1	0
0	何玉义	7	1	11		9	1	6	1	6	1	7	1	0	2	1	0
0	张国平	6	1	10		9	2	7	2	6	1	6	1	0	2	1	0
0	胡永峰	3	1	7		7	1	6	1	4	1	3	1	0	3	1	0
0	龚福田	6	1	10		9	1	6	1	6	1	6	1	0	3	1	0
0	朱瑞伦	3	1	7		7	1	6	1	4	1	3	1	0	3	1	0
0	王丙侠	4	1	7		7	1	6	1	4	1	4	1	0	3	1	0
0	李发中	7	1	11		11	2	8	2	8	2	7	1	0	3	1	0
0	王林凤	3	1	6		6	1	4	1	4	1	3	1	0	1	1	0
0	曹连发	4	1	7		6	1	4	1	4	1	4	1	0	1	1	0
0	周道海	4	1	7		6	1	4	1	4	1	4	1	0	1	1	0
0	丁常转	4	1	7		7	1	6	1	4	1	4	1	0	1	1	0
0	宋家乡	4	1	7		6	1	6	1	4	1	4	1	0	1	1	0
0	何朝年	5	1	8		7	2	6	1	5	1	5	1	0	1	1	0
0	廖克凤	6	1	9		8	1	6	1	5	1	6	1	0	1	1	0
0	邓大华	4	1	8		8	2	7	2	5	1	4	1	0	1	1	0
0	刘永泉	5	1	8		8	2	7	1	6	1	5	1	0	1	1	0
0	蒋佃启	4	1	8		8	1	6	1	6	1	4	1	0	1	1	0
0	夏家丁	4	1	7		7	1	6	1	6	1	5	1	0	1	1	0
0	邢应何	6	1	10		9	1	6	1	6	1	6	1	0	1	1	0
0	胡兆平	6	1	10		10	1	6	1	6	1	6	1	0	1	1	0
0	董善秀	6	1	10		8	1	6	1	6	1	6	1	0	1	1	0
0	乔玉传	6	1	10		9	1	6	1	6	1	6	1	0	1	1	0
0	葛和金	6	1	10		9	1	6	1	6	1	6	1	0	1	1	0
0	杨学荣	6	1	10		10	1	6	1	6	1	6	1	0	1	1	0
0	聂美英	6	1	10		10	1	7	1	7	1	6	1	0	1	1	0
0	唐开芝	8	1	11		10	1	8	1	8	1	8	1	0	1	1	0
0	米高兰	1	1	3		2	1	3	1	2	1	1	1	0	2	1	0
0	丁玉珍	2	1	5		4	1	3	1	2	1	2	1	0	2	1	0
0	陈世达	2	1	6		5	1	4	1	2	1	2	1	0	2	1	0
0	袁奇斌	2	1	6		5	1	5	1	2	1	2	1	0	2	1	0
0	张院生	3	1	6		5	1	4	1	3	1	3	1	0	2	1	0
0	胡玉娥	3	1	6		5	1	4	1	3	1	3	1	0	2	1	0
0	毕井生	4	1	8		7	1	4	1	4	1	4	1	0	2	1	0
0	申银双	4	1	7		7	1	6	1	4	1	4	1	0	2	1	0
0	朱应根	4	1	8		8	1	6	1	4	1	4	1	0	2	1	0
0	夏登湖	4	1	8		7	1	6	1	4	1	4	1	0	2	1	0
0	宁国芳	4	1	8		8	1	7	1	4	1	4	1	0	2	1	0
0	陈家珍	4	1	8		8	1	7	1	4	1	4	1	0	2	1	0
0	李纯存	4	1	7		6	1	6	1	6	1	5	1	0	2	1	0
0	王传杨	6	1	10		10	1	6	1	6	1	6	1	0	2	1	0
0	徐光梅	6	1	10		9	2	6	1	6	1	6	1	0	2	1	0
0	甘永宗	7	1	10		9	2	7	1	7	1	7	1	0	3	1	0
0	单成跃	6	1	9		9	2	6	1	6	1	6	1	0	3	1	0
0	袁传茹	8	1	11		11	1	8	1	8	1	8	1	0	3	1	0
0	胡云霞	2	1	5		3	1	3	1	2	1	2	1	0	3	1	0
0	郑相凤	2	1	5		4	1	4	1	2	1	2	1	0	3	1	0
0	沈天林	3	1	6		6	1	5	1	3	1	3	1	0	3	1	0
0	朱祥梅	4	1	8		7	1	7	1	4	1	4	1	0	3	1	0
0	王淑琴	5	1	9		9	1	6	1	5	1	5	1	0	3	1	0
0	张学刚	1	1	3		2	1	1	1	1	1	1	1	0	2	2	0
0	杜运中	5	1	9		8	1	7	1	5	1	5	1	0	2	2	0
0	蒋传荣	6	1	10		8	1	6	1	6	1	6	1	0	2	2	0
0	秦德柱	6	1	10		8	2	6	2	6	1	6	1	0	2	2	0
0	叶祥付	4	1	7		6	1	6	1	4	1	4	1	0	2	2	0
0	罗德生	6	1	10		9	1	6	1	6	1	6	1	0	2	2	0
0	徐根苗	3	1	6		5	1	4	1	3	1	3	1	0	3	2	0
0	吴咏梅	4	1	8		7	1	4	1	4	1	4	1	0	3	2	0
0	杨德平	5	1	8		8	1	7	1	6	1	5	1	0	3	2	0
0	马光跃	6	1	10		8	1	6	1	6	1	6	1	0	3	2	0
0	朱水根	6	1	10		9	2	6	2	6	1	6	1	0	3	2	0
0	刘殿缇	7	1	10		9	2	7	2	7	1	7	1	0	3	2	0
0	汪学义	7	1	11		11	1	8	1	8	1	7	1	0	3	2	0
0	胡少霞	8	1	11		11	1	8	1	8	1	8	1	0	3	2	0
0	杨爱枝	4	1	7		7	1	4	1	4	1	4	1	1	3	2	0
0	杨爱云	1	1	3		3	1	2	1	1	1	1	1	0	3	2	0
0	项凤琴	2	1	5		5	1	4	1	2	1	2	1	0	3	2	0
0	戴胜如	2	1	6		6	1	5	1	3	1	2	1	0	3	2	0
0	张绍峰	4	1	8		7	1	4	1	4	1	4	1	0	3	2	0
0	夏成玉	4	1	7		7	1	7	1	4	1	4	1	0	3	2	0
0	刘宗宝	5	1	9		8	1	6	1	5	1	5	1	0	3	2	0
0	张守侠	5	1	8		8	1	7	1	5	1	5	1	0	3	2	0
0	尚秀玲	5	1	10		8	1	7	1	6	1	5	1	0	3	3	0
0	桂龙姣	5	1	8		8	1	6	1	6	1	5	1	0	3	3	0
0	吴秀梅	1	1	3		3	1	2	1	1	1	1	1	0	0	0	0
0	卢泽	2	1	6		6	1	5	1	2	1	2	1	0	0	0	0
0	彭仁青	3	1	6		5	1	4	1	3	1	3	1	0	0	0	0
0	王克能	3	1	7		6	1	5	1	3	1	3	1	0	0	0	0
0	贾贤芳	3	1	7		6	1	5	1	3	1	3	1	0	0	0	0
0	圣业翠	3	1	7		6	1	5	1	3	1	3	1	0	0	0	0
0	吕树美	3	1	7		7	1	6	1	3	1	3	1	0	0	0	0
0	卫冬群	3	1	6		5	1	4	1	4	1	3	1	0	0	0	0
0	石荒保	3	1	6		6	1	5	1	4	1	4	1	0	0	0	0
0	胡秀玉	5	1	10		10	1	7	1	6	1	5	1	0	0	0	0
0	颜革命	5	1	8		7	1	6	1	6	1	6	1	0	0	0	0
0	童文斌	5	1	9		8	1	6	1	6	1	5	1	0	0	0	0
0	张立	1	1	3		3	1	2	1	1	1	1	1	0	0	0	0
0	陈锐	1	1	3		3	1	2	1	1	1	1	1	0	0	0	0
0	江琴	2	1	5		4	1	4	1	2	1	3	1	0	0	0	0
0	陆士俊	4	1	7		6	1	6	1	4	1	4	1	0	0	0	0
0	王海	4	1	8		8	1	7	1	4	1	4	1	0	0	0	0
0	彭宗侠	7	1	10		8	1	7	1	7	1	7	1	0	0	0	0
0	姜仁俊	2	1	6		5	1	4	1	2	1	2	1	0	1	0	0
0	刘金旺	2	1	5		5	1	4	1	2	1	2	1	0	1	0	0
0	时其环	3	1	6		5	1	4	1	3	1	3	1	0	1	0	0
0	吴正英	3	1	7		7	1	4	1	3	1	3	1	0	1	0	0
0	查桂虎	3	1	6		5	1	4	1	3	1	3	1	0	1	0	0
0	聂士俊	2	1	5		5	1	5	1	3	1	2	1	0	1	0	0
0	谢忠轮	4	1	7		6	1	6	1	4	1	4	1	0	1	0	0
0	陈玉环	2	1	5		5	1	4	1	2	1	2	1	0	1	0	0
0	薛光成	4	1	7		7	1	6	1	4	1	4	1	0	1	0	0
0	台建付	5	1	9		7	1	7	1	5	1	5	1	0	1	0	0
0	殷志宏	2	1	6		5	1	4	1	2	1	2	1	0	0	0	0
0	杨勇	3	1	6		6	1	4	1	3	1	3	1	0	0	0	0
0	张德进	3	1	7		6	1	5	1	3	1	3	1	0	0	0	0
0	杨春成	4	1	8		7	2	7	2	5	2	4	1	0	0	0	0
0	谢仲遗	6	1	10		9	1	7	1	6	1	6	1	0	0	0	0
0	张喜才	1	1	4		3	1	3	1	2	1	2	1	0	1	1	0
0	王春景	4	1	7		6	1	4	1	4	1	4	1	0	1	1	0
0	陈义现	4	1	8		7	1	6	1	4	1	4	1	0	1	1	0
0	汪香兰	4	1	8		8	1	7	1	4	1	4	1	0	1	1	0
0	张其彪	5	1	9		8	1	6	1	5	1	5	1	0	1	1	0
0	高泽明	4	1	8		7	1	6	1	6	1	5	1	0	1	1	0
0	韩贵兰	5	1	9		9	1	6	1	6	1	5	1	0	1	1	0
0	高金香	6	1	10		8	1	6	1	6	1	6	1	0	1	1	0
0	汪云翠	6	1	10		8	1	6	1	6	1	6	1	0	1	1	0
0	戴荣芳	6	1	10		9	1	6	1	6	1	6	1	0	1	1	0
0	陈先长	1	1	3		2	1	2	1	1	1	1	1	0	1	1	0
0	李广金	2	1	6		6	1	4	1	2	1	2	1	0	1	1	0
0	王立贵	3	1	6		6	2	4	1	3	1	3	1	0	1	1	0
0	梁伙明	4	1	7		7	1	4	1	4	1	4	1	0	1	1	0
0	韩家启	3	1	7		7	1	6	1	4	1	3	1	0	1	1	0
0	马平东	6	1	10		9	1	6	1	5	1	6	1	0	1	1	0
0	周传鲁	4	1	7		6	1	7	1	5	1	4	1	0	1	1	0
0	张玉叶	5	1	9		8	1	7	1	5	1	5	1	0	1	1	0
0	张福庆	4	1	8		8	1	6	1	6	1	4	1	0	1	1	0
0	孔祥明	5	1	9		7	1	6	1	6	1	5	1	0	1	1	0
0	胡方爱	6	1	10		10	1	7	1	7	1	6	1	0	1	1	0
0	宋法广	7	1	10		8	1	7	1	7	1	7	1	0	1	1	0
0	董照荣	7	1	10		10	2	8	2	7	1	7	1	0	1	1	0
0	尹德林	2	1	5		4	1	3	1	2	1	2	1	0	2	1	0
0	高影	2	1	5		4	1	4	1	2	1	2	1	0	2	1	0
0	陈春华	3	1	6		5	1	4	1	3	1	3	1	0	2	1	0
0	刘邦伟	3	1	7		6	1	4	1	3	1	3	1	0	2	1	0
0	陈刚	3	1	6		5	1	5	1	3	1	3	1	0	2	1	0
0	王支道	3	1	6		6	1	5	1	3	1	3	1	0	2	1	0
0	王安云	4	1	7		7	1	6	1	4	1	4	1	0	2	1	0
0	方宗贵	5	1	8		7	1	6	1	5	1	5	1	0	2	1	0
0	黄国莲	5	1	9		8	1	6	1	5	1	5	1	0	2	1	0
0	刘世香	5	1	10		8	1	7	1	5	1	5	1	0	2	1	0
0	章尤廷	5	1	9		8	1	7	1	5	1	5	1	0	2	1	0
0	祝洪堂	5	1	9		8	1	7	1	6	1	5	1	0	2	1	0
0	李思好	4	1	7		6	1	6	1	6	1	4	1	0	2	1	0
0	张宏星	4	1	8		7	2	6	1	6	1	5	1	0	2	1	0
0	沈光美	6	1	10		8	1	6	1	6	1	6	1	0	2	1	0
0	李邦寿	6	1	10		9	1	6	1	6	1	6	1	0	2	1	0
0	向从友	7	1	10		9	2	6	1	6	1	7	1	0	2	1	0
0	胡达仁	6	1	10		9	1	7	1	6	1	6	1	0	2	1	0
0	李世银	6	1	10		10	1	7	1	6	1	6	1	0	2	1	0
0	程其江	6	1	10		9	1	7	1	7	1	6	1	0	2	1	0
0	杨凤英	6	1	10		10	1	6	1	6	1	6	1	0	3	1	0
0	彭西仁	7	1	10		9	2	7	2	7	1	7	1	0	3	1	0
0	耿世武	2	1	5		4	1	4	1	2	1	2	1	0	3	1	0
0	张爱琴	3	1	6		6	1	4	1	3	1	3	1	0	3	1	0
0	纪正平	3	1	7		7	1	5	1	3	1	3	1	0	3	1	0
0	张桂娟	5	1	9		8	1	6	1	5	1	5	1	0	1	1	0
0	陆勤权	4	1	7		7	1	7	1	5	1	4	1	0	1	1	0
0	周福林	2	1	6		6	1	5	1	3	1	2	1	0	3	2	0
0	崔新刚	3	1	7		7	1	5	1	3	1	3	1	0	3	2	0
0	张丹和	3	1	6		6	1	5	1	3	1	3	1	0	3	2	0
0	王永红	4	1	7		6	1	6	1	4	1	4	1	0	3	2	0
0	王传美	4	1	8		7	1	6	1	4	1	4	1	0	3	2	0
0	周庆凤	5	1	9		8	1	7	1	5	1	5	1	0	3	2	0
0	董翠英	4	1	7		7	1	6	1	4	1	4	1	0	0	0	0
0	夏菊荣	6	1	10		8	1	7	1	7	1	6	1	0	1	1	0
0	李玉连	2	1	6		6	1	4	1	2	1	2	1	0	1	1	0
0	金申武	4	1	7		7	1	6	1	6	1	4	1	0	3	2	0
0	申克军	2	1	5		4	1	3	1	3	1	2	1	0	3	3	0
0	郑志千	8	1	11		10	1	6	1	6	1	8	1	1	1	1	1
0	杨淑芳	8	1	11		9	1	6	1	7	1	8	1	1	1	1	1
0	李家海	7	1	11		10	2	7	2	7	2	7	2	1	1	1	1
0	郑光泽	9	2	11		11	2	10	2	10	2	9	2	1	1	1	1
0	方余庆	6	1	11		10	2	7	2	6	1	6	1	1	1	1	1
0	盛大和	3	1	7		6	1	5	1	3	1	3	1	0	3	1	0
0	周开利	3	1	7		7	1	5	1	3	1	3	1	0	3	1	0
0	王东超	4	1	7		6	1	6	1	4	1	4	1	0	3	1	0
0	赵世泉	7	1	11		10	2	7	2	7	1	7	1	0	3	1	0
0	黄大书	7	1	10		10	1	8	1	7	1	7	1	0	3	1	0
0	姚运权	6	1	10		9	2	6	2	6	2	6	1	1	3	1	1
0	潘仁华	6	1	10		8	1	6	1	6	1	6	1	1	1	1	1
0	程东合	7	1	11		10	1	7	1	7	1	7	1	1	1	1	1
0	申红莲	1	1	3		2	1	1	1	1	1	1	1	0	1	1	0
0	王朝晖	3	1	7		6	1	5	1	3	1	3	1	0	1	1	0
0	陈守红	3	1	7		6	1	5	1	3	1	3	1	0	1	1	0
0	沈世和	4	1	7		7	1	4	1	4	1	4	1	0	1	1	0
0	张良英	4	1	7		7	1	6	1	4	1	4	1	0	1	1	0
0	刘承勋	5	1	10		9	1	7	1	6	1	5	1	0	1	1	0
0	张生发	6	1	9		8	1	6	1	6	1	6	1	0	1	1	0
0	谢道成	7	1	11		10	2	7	2	7	2	7	2	0	1	1	0
0	刘先伦	6	1	10		9	1	7	1	6	1	6	1	1	1	1	1
0	何平安	6	1	10		9	2	7	2	6	2	6	2	1	1	1	1
0	高成年	6	1	10		10	1	7	1	7	1	6	1	1	1	1	1
0	苏有传	7	1	10		10	2	7	1	7	1	7	1	1	1	1	1
0	桂玉胜	2	1	5		4	1	4	1	2	1	2	1	0	3	2	0
0	袁腊梅	2	1	6		6	1	5	1	2	1	2	1	0	3	2	0
0	苏秀华	3	1	7		6	1	5	1	3	1	3	1	0	3	2	0
0	彭国常	4	1	7		7	1	4	1	4	1	4	1	0	3	2	0
0	晏兰章	4	1	8		8	1	7	1	4	1	4	1	0	3	2	0
0	刘长枝	5	1	10		8	1	7	1	5	1	5	1	0	3	2	0
0	卞修清	8	2	11		11	2	8	2	8	2	8	2	1	3	2	1
0	王玉云	6	1	10		10	1	7	1	6	1	6	1	1	3	2	1
0	裴章泳	7	1	10		10	2	8	2	8	1	7	1	1	3	2	1
0	韩德志	8	1	11		10	2	8	2	8	2	8	1	1	3	2	1
0	杨立胜	3	1	7		6	1	5	1	4	1	4	1	0	3	2	0
0	袁广兰	2	1	6		5	1	4	1	2	1	2	1	0	3	2	0
0	汪正福	2	1	6		5	1	5	1	2	1	2	1	0	3	2	0
0	赵行华	1	1	3		3	1	2	1	1	1	1	1	0	3	2	0
0	张侠	1	1	3		3	1	2	1	1	1	1	1	0	3	2	0
0	孟宪林	3	1	6		5	1	4	1	3	1	3	1	0	3	2	0
0	张茂堂	3	1	7		6	1	4	1	3	1	3	1	0	3	2	0
0	彭梅花	4	1	7		6	1	4	1	4	1	4	1	0	3	2	0
0	周锦秀	4	1	7		7	1	6	1	4	1	4	1	0	3	2	0
0	俞侯存	5	1	8		7	1	6	1	5	1	5	1	0	3	2	0
0	罗运华	5	1	9		7	1	7	1	5	1	5	1	0	3	2	0
0	余丙发	6	1	10		9	1	7	1	7	1	6	1	0	3	2	0
0	袁华新	7	1	11		11	2	7	2	7	2	7	1	0	3	2	0
0	白和明	7	1	11		10	2	7	2	7	1	7	1	1	3	2	1
0	吴小淮	3	1	6		6	1	4	1	3	1	3	1	0	3	2	0
0	葛敏文	3	1	6		6	1	4	1	3	1	3	1	0	3	2	0
0	刘士社	4	1	8		7	1	6	1	4	1	4	1	0	3	2	0
0	王家枝	4	1	7		7	1	6	1	4	1	4	1	0	3	2	0
0	万德清	4	1	7		6	1	6	1	4	1	4	1	0	3	2	0
0	钟业琴	5	1	8		7	1	6	1	5	1	5	1	0	3	2	0
0	赵先松	4	1	8		8	1	7	1	5	1	4	1	0	3	2	0
0	刘克华	5	1	9		8	1	7	1	5	1	5	1	0	3	2	0
0	吴菊香	5	1	9		8	2	7	2	6	1	5	1	0	3	2	0
0	刘方珍	6	1	10		8	1	6	1	6	1	6	1	0	3	2	0
0	吴绳才	7	1	10		9	2	7	2	7	1	7	1	0	3	2	0
0	李永强	1	1	4		3	1	2	1	1	1	1	1	0	3	2	0
0	李济芳	5	1	9		8	1	7	1	5	1	5	1	0	3	2	0
0	陈和青	6	1	10		9	1	6	1	6	1	6	1	0	3	2	0
0	李修凤	6	1	10		9	1	7	1	6	1	6	1	0	3	2	0
0	高佳佳	0	1	2		2	1	1	1	0	1	0	1	0	3	3	1
0	张振季	5	1	9		8	1	7	1	5	1	5	1	0	3	3	1
0	李荣华	8	1	11		10	1	8	1	8	1	8	1	0	4	3	1
0	胡庆生	3	1	7		7	1	4	1	3	1	3	1	0	3	3	1
0	王晋芬	5	1	9		8	1	7	1	6	1	5	1	1	1	1	1
0	余以兵	3	1	6		6	1	5	1	4	1	3	1	0	1	1	0
0	徐子洲	6	1	10		8	2	6	1	6	1	6	1	1	1	1	1
0	韩中婷	3	1	6		6	1	5	1	3	1	3	1	0	3	2	0
0	王克柱	3	1	7		6	1	4	1	3	1	3	1	0	3	2	0
0	朱祥凤	6	1	10		9	1	6	1	6	1	6	1	0	3	2	0
0	褚作英	7	1	11		11	1	7	1	7	1	7	1	1	3	2	1
0	孙秀玲	2	1	5		5	1	3	1	2	1	2	1	0	3	3	1
0	李光珍	4	1	9		7	1	6	1	4	1	4	1	1	0	3	1
0	徐玲	4	1	7		6	1	6	1	4	1	4	1	0	3	2	0
0	郑小俊	4	1	8		8	2	6	2	4	2	4	2	0	3	2	1
0	郭玉香	5	1	9		8	1	7	1	5	1	5	1	0	3	2	1
0	陈飞	3	1	7		6	1	4	1	4	1	3	1	0	4	3	1
0	孙向前	6	1	10		9	1	6	1	6	1	6	1	0	4	3	0
0	杨学理	5	1	8		7	2	7	2	6	1	5	1	0	4	4	1
0	汤传红	4	1	8		7	1	6	1	4	1	4	1	1	4	4	2
0	杨品仁	7	1	10		10	2	7	2	7	2	7	2	1	1	1	1
0	崔化乘	8	2	11		10	2	9	2	9	2	8	2	1	1	1	1
0	李应贵	4	1	7		7	2	7	2	5	1	4	1	0	1	1	0
