# Supplementary material for: Analysis of bowel function, urogenital function, and long-term follow-up outcomes associated with robotic and laparoscopic sphincter-preserving surgical approaches to total mesorectal excision in low rectal cancer: a retrospective cohort study
Source: World J Surg Oncol. 2022 May 27;20:167. doi: 10.1186/s12957-022-02631-0 (PMC9137207; doi:10.1186/s12957-022-02631-0)
Supplement: Supplementary file 2 — Additional file 2. [file 12957_2022_2631_MOESM2_ESM.xlsx]

## Sheet: 工作表1
Surgical approach	name						IIEF score(1) and FIFS score(2)
		Sex			distance from anal edge	age	Pre-operation	postoperative 3 month	postoperative 6 month	postoperative 12 month	postoperative 24 month
1,Robotic approach 0,Laparoscopic approach		1male 2female	分级	分级
1	林辉	1	1	1	4	28.3753	70	26	40	55	62
1	朱家宝	1	1	1	6	29.9425	68	29	49	60	62
1	李道军	1	1	1	4	32.8904	65	21	30	35	37
1	刘炳付	1	1	1	4.5	33.9945	66	17	24	30	31
1	张奎	1	1	1	6	35.1726	66	30	50	60	61
1	陶满胜	1	1	1	5	36.0712	64	24	44	55	58
1	张多伍	1	1	1	3	39.0849	64	19	35	38	44
1	王立岚	1	1	1	4	42.5699	60	21	38	46	51
1	汪宏兵	1	1	1	5	42.9918	62	24	40	48	55
1	方有元	1	1	1	5	43.0356	63	26	42	50	58
1	吴明政	1	1	1	5	43.8466	62	23	40	50	57
1	胡申付	1	1	1	6	44.4603	62	24	40	53	58
1	谢振彬	1	1	1	6	44.4986	60	21	38	48	53
1	聂忠华	1	1	1	5	44.6521	63	23	40	50	55
1	袁双印	1	1	1	5	44.663	62	25	42	52	55
1	范江红	1	1	1	4	44.7753	61	19	35	40	44
1	郑景全	1	1	1	6	45.2493	55	20	40	45	51
1	费维柱	1	1	1	4.5	45.4247	58	23	36	42	47
1	高峰	1	1	1	6	45.4521	60	17	36	48	54
1	王仲玉	1	1	1	4	48.063	69	17	36	48	58
1	张东发	1	1	1	4	48.0877	60	20	39	50	54
1	段子亮	1	1	1	6	48.1671	61	24	42	53	55
1	郑章宝	1	1	1	4	48.2986	55	15	35	45	49
1	朱仕银	1	1	1	4.5	48.3726	60	19	36	45	54
1	王小流	1	1	1	5	48.6877	59	21	37	47	53
1	陈可方	1	1	1	5.5	48.8712	55	23	40	46	51
1	李新	1	1	1	4	49.3123	55	18	36	45	51
1	储成方	1	1	1	4	49.4904	60	18	37	46	51
1	张卫兵	1	1	1	6	49.6685	55	11	37	44	49
1	于中文	1	1	1	4	49.9973	55	16	34	45	49
1	何世华	1	1	1	5	50.1753	58	19	45	48	53
1	李国平	1	1	1	6	50.3151	55	16	40	46	49
1	谢四平	1	1	1	4.5	50.5123	53	14	35	42	49
1	王前付	1	1	1	5	50.537	55	15	38	45	49
1	石玉贵	1	1	1	6	50.6877	56	16	38	46	50
1	高小文	1	1	1	6	50.8082	59	22	42	50	54
1	李治东	1	1	1	5	51.0603	56	20	40	45	51
1	赵宜保	1	1	1	5	51.4932	56	16	40	44	51
1	吴自宏	1	1	1	5	51.526	58	18	39	44	54
1	高峰	1	1	1	4	51.5452	60	20	35	45	51
1	高治中	1	0	1	6	52.0192	57	19	39	46	51
1	琚炳超	1	1	1	5	53.2137	58	22	40	46	51
1	廖国林	1	1	1	5	53.3014	60	20	42	48	55
1	柴助学	1	1	1	4	53.7808	50	10	28	31	34
1	张中祥	1	1	1	5	54.0219	51	21	40	44	47
1	王玉树	1	1	1	6	54.2219	55	25	41	45	50
0	刘小波	1	1	1	5	22.0137	72	36	55	61	65
0	张喜才	1	1	1	6	32.1918	68	32	51	55	60
0	陈锐	1	1	1	6	35.6795	65	20	40	48	57
0	耿世武	1	1	1	5	37.5397	67	24	38	44	56
0	马连雨	1	1	1	6	38.137	67	20	45	50	62
0	李永强	1	1	1	5	38.6603	66	21	38	48	63
0	张广华	1	1	1	6	39.1014	68	28	48	54	63
0	马文	1	1	1	5	39.5781	65	24	39	45	62
0	张社权	1	1	1	6	40.3288	66	26	45	53	62
0	方彬	1	1	1	6	41.0219	65	25	39	48	60
0	方泽玉	1	1	1	6	41.8438	63	22	41	49	60
0	张毛才	1	1	1	6	41.9973	63	21	39	49	58
0	祁军	1	1	1	6	42.9589	65	25	44	50	60
0	孟进根	1	1	1	6	43.611	62	25	43	52	58
0	张立	1	1	1	6	43.6247	63	20	39	45	55
0	姜仁俊	1	1	1	6	44.3014	60	22	39	45	52
0	江明	1	1	1	6	44.8	64	20	37	43	52
0	王修保	1	1	1	6	45.0356	64	20	39	42	51
0	袁奇斌	1	1	1	6	45.0986	63	20	38	40	47
0	郑向东	1	1	1	6	45.1699	63	19	38	42	52
0	汪正福	1	1	1	4.5	45.589	64	20	34	40	50
0	路前岳	1	1	1	6	45.6438	64	25	43	48	55
0	丁希学	1	1	0	6	45.8082	63	18	38	41	50
0	何金龙	1	1	1	6	45.9671	63	19	38	48	55
0	刘道海	1	1	1	6	46.3123	62	20	33	45	55
0	张学刚	1	1	1	5	46.5945	58	19	33	41	50
0	陈先长	1	1	1	6	46.674	60	16	35	43	50
0	李四壹	1	1	1	6	47.3534	59	16	34	40	50
0	苏建平	1	1	1	6	47.5616	59	20	34	42	52
0	许成余	1	1	1	6	47.6603	60	20	35	37	50
0	李家荣	1	1	1	6	47.7918	60	20	35	40	50
0	桂玉胜	1	1	1	6	47.8877	58	18	35	42	50
0	陈满华	1	1	1	6	47.9507	59	13	32	40	50
0	江中建	1	1	1	6	48.1096	59	15	33	39	48
0	周福林	1	1	1	5.5	48.7753	58	18	33	38	48
0	周开利	1	1	1	4.5	48.8384	56	16	24	28	38
0	李广金	1	1	1	6	48.8521	59	19	29	38	48
0	司守青	1	1	1	6	48.8767	60	20	29	35	45
0	刘金旺	1	1	1	6	48.9918	67	15	30	35	45
0	陈世达	1	1	1	5	49.3781	56	12	25	33	43
0	韩延社	1	1	1	6	49.4986	55	18	29	37	47
0	卫冬群	1	1	1	5.5	49.7014	56	16	32	38	48
0	胡伟栋	1	1	1	6	49.8137	55	20	31	40	49
0	张院生	1	1	1	6	49.8274	56	16	34	39	50
0	郭怀礼	1	1	1	6	49.8438	52	15	33	40	49
0	潘晓飞	1	1	1	6	50.611	56	16	33	39	50
0	谭赛平	1	1	1	6	50.7123	50	15	31	37	45
0	何平	1	1	1	6	50.9534	55	20	35	43	50
0	余道香	1	1	1	6	50.9863	56	16	34	40	50
0	王万明	1	1	1	6	51.2164	54	18	32	38	50
0	张世芹	1	1	1	6	51.4301	56	16	31	39	49
0	沈天林	1	1	1	4.5	51.474	57	17	29	35	45
0	李明	1	1	1	6	51.6575	51	20	31	39	46
0	刘玉龙	1	1	1	6	51.674	55	16	30	39	48
0	严志来	1	1	1	6	51.8274	59	19	31	39	48
0	王纯东	1	1	1	6	52.0301	60	20	32	38	48
0	卢泽	1	1	1	6	52.2192	56	20	31	37	47
0	余鸿浩	1	1	1	6	52.3123	57	17	32	38	48
0	刘向东	1	1	1	6	52.5288	54	20	33	39	49
0	申克军	1	1	1	4	52.7534	54	14	29	35	46
0	曹之植	1	1	1	6	52.7945	56	18	33	41	48
0	戴胜如	1	1	1	6	52.926	60	23	39	45	50
0	冯玉存	1	1	1	6	53.3973	59	22	39	47	52
0	王支道	1	1	1	5	53.4247	58	20	33	36	46
0	盛大和	1	1	1	5	53.5671	56	18	32	38	46
0	徐礼旺	1	1	1	6	53.5699	56	16	33	40	46
0	殷志宏	1	1	1	6	53.6137	51	14	30	36	46
0	李光树	1	1	1	6	53.7918	51	18	32	41	46
0	程贞文	1	1	1	6	53.8219	52	14	30	36	46
0	操旺胜	1	1	1	6	53.9068	53	15	28	34	46
0	胡清华	1	1	1	6	53.9973	54	20	30	36	46
0	王克能	1	1	1	6	54.1836	55	15	29	35	45
0	孟宪林	1	1	1	5	54.2356	54	14	25	30	40
0	胡庆生	1	1	1	4.5	54.3233	56	16	31	33	44
0	曹连发	1	1	1	6	54.4904	51	15	26	32	42
1	吴小琼	2	1	1	4	30.1726	32	24	27	28	30
1	孙金花	2	1	1	5	33.1534	34	25	28	31	32
1	钱丽娟	2	1	1	6	35.2822	30	20	25	28	30
1	刘小梅	2	1	1	5	42.0082	29	21	23	25	28
1	刘敏华	2	1	1	4	44.1096	26	15	18	20	25
1	李其花	2	1	1	5	46.4055	28	19	23	24	26
1	张洁影	2	1	1	5	47.0027	24	16	19	21	22
1	储秀珍	2	1	1	4	47.6055	24	16	18	19	20
1	胡敬霞	2	1	1	6	49.9342	26	18	20	22	24
1	李郑霞	2	1	1	5	50.0219	24	16	19	20	23
1	汪要娟	2	1	1	3	50.8932	24	13	14	14	18
1	邓艳萍	2	1	1	4	50.9397	25	16	18	20	20
1	陈国芳	2	1	1	5	51.9616	24	16	19	21	21
1	姚香枝	2	1	1	5.5	52.0329	23	15	17	20	21
1	蔡存芝	2	1	1	4	52.0466	24	16	18	21	22
1	林敏	2	1	1	6	52.2932	24	16	20	23	23
1	谢晓华	2	1	1	5	53.2822	21	13	15	19	20
1	蔡宝兰	2	1	1	5	53.5836	20	12	16	18	19
1	李玲	2	1	1	6	54.5178	20	12	16	17	18
1	李庆芹	2	1	1	5	54.5699	20	12	15	16	18
0	高佳佳	2	1	1	4.5	25.2329	32	16	19	23	28
0	吴秀梅	2	1	1	6	36.8877	30	18	20	24	29
0	祝海燕	2	1	1	6	37.0192	30	20	22	24	28
0	朱长娥	2	1	1	6	37.2438	31	20	22	25	30
0	郝淑平	2	1	1	6	38.1014	30	19	20	24	28
0	申红莲	2	1	1	6	38.9151	29	18	20	24	28
0	藕春荣	2	1	1	6	40.4219	29	18	20	24	27
0	张侠	2	1	1	5	41.0438	30	19	21	25	29
0	朱明霞	2	1	1	6	41.4575	28	18	19	23	26
0	米高兰	2	1	1	6	41.9178	29	18	20	24	27
0	杨爱云	2	1	1	5	42.9233	28	17	20	23	26
0	赵行华	2	1	1	5	43.789	28	17	19	21	25
0	江琴	2	1	1	6	44.6	29	17	20	23	26
0	韩中婷	2	1	1	5	45.2959	26	15	17	21	24
0	李云英	2	1	1	6	45.3068	25	15	17	19	22
0	尹德林	2	1	1	6	46.3068	24	13	15	18	22
0	胡云霞	2	1	1	5	46.5123	22	14	16	17	20
0	张英	2	1	1	6	46.5781	25	15	18	20	23
0	袁腊梅	2	1	1	5	47.0548	24	11	12	15	16
0	丁玉珍	2	1	1	6	47.1014	24	12	16	18	22
0	陈方枝	2	1	1	6	47.3671	23	13	15	18	22
0	葛江红	2	1	1	6	47.5315	23	14	16	17	19
0	孙秀玲	2	1	1	4	47.737	24	12	14	17	20
0	屠国云	2	1	1	6	48.0932	23	15	17	19	23
0	马建芳	2	1	1	6	48.2301	22	11	13	18	22
0	杨芳	2	1	1	6	48.3726	22	12	14	16	22
0	陈守红	2	1	1	6	48.3781	24	13	17	19	22
0	张银美	2	1	1	6	48.4548	24	13	15	16	22
0	高影	2	1	1	5.5	48.5699	25	12	14	19	23
0	周克云	2	1	1	6	48.5808	24	13	16	19	22
0	陆玉荣	2	1	1	6	49.3014	23	14	16	18	21
0	龚义霞	2	1	1	6	49.5014	23	14	17	19	21
0	郑相凤	2	1	1	5	49.5918	24	13	16	19	22
0	陈玉环	2	1	1	6	49.8301	22	12	16	18	20
0	项凤琴	2	1	1	5	50.2466	22	11	12	16	20
0	伍德兰	2	1	1	6	50.9918	21	13	15	18	21
0	圣业翠	2	1	1	6	51.0685	21	13	15	17	19
0	孙守云	2	1	1	6	51.4192	21	12	16	17	19
0	左从英	2	1	1	6	51.5397	22	12	13	18	21
0	汪爱华	2	1	1	6	51.9123	24	14	16	19	22
0	贾贤芳	2	1	1	6	52.0082	23	14	15	18	22
0	李玉连	2	1	1	6	52.1315	24	14	16	20	23
0	吴正英	2	1	1	6	52.1973	23	15	16	19	22
0	魏如群	2	1	1	6	52.2959	22	13	15	18	21
0	王丙侠	2	1	1	5	52.337	22	11	13	17	20
0	杨文凤	2	1	1	5	52.6082	24	11	12	15	16
0	覃小会	2	1	1	6	52.8219	25	15	16	19	21
0	胡玉娥	2	1	1	5	53.0137	23	15	16	18	21
0	聂士俊	2	1	1	6	53.2082	22	14	15	17	20
0	袁永菊	2	1	1	6	53.389	21	13	14	18	20
0	张本云	2	1	1	6	53.8904	23	14	15	17	21
0	张维英	2	1	1	5	54.0438	23	13	13	14	15
0	范和平	2	1	1	6	54.0712	22	12	12	14	14
0	张良英	2	1	1	6	54.0986	20	12	13	14	17
0	董翠英	2	1	1	6	54.2438	20	11	11	13	15
1	刘士业	1
0	江太望	1	0	0
0	刘广舟	1
1	张中其	1	1	0
1	李结军	1	1	1
0	姚双伍	1
1	申白云	1	1	0			0
1	吴玉会	2	1	0
1	张国友	1	1	1
1	王平	1	1	1
1	胡孝镒	1	1	1
1	韩修学	1	1	1
1	郑礼贤	1	1	0
1	陈新杰	1	1	1
1	陈红仙	2	1	1
1	胡孔国	1	1	1
1	吴娟香	2	1	1
1	程广侠	1	1	0
1	吴桂兰	2	1	1
1	吴义禄	1	1	1
1	仇志兰	2	1	1
1	张守华	2	1	1
1	费金香	2	1	1
1	胡建生	1	1	1
1	闫广兰	2	1	1			0
1	王元兴	1	1	1
1	李春香	2	1	1
1	鲍金凤	2	1	1			0
1	吴小妹	2	1	1			0
1	宣正炎	1	1	1
1	王明荣	1	1	1
1	王伟琴	2	1	1
1	项其爱	2	1	1
1	陈荣珍	2	1	1
0	李怀娥	2	1	1
0	周兰贤	2	1	1
0	朱圣虎	1	1	1
0	尹传信	1	1	0
0	刘树祥	1	1	1
0	吴桂芳	2	1	1
0	郭其英	2	1	0
0	储常术	1	1	1
0	周桂芝	2	1	1
0	王龙平	2	1	1
0	杨顺姐	2	1	1
0	汤业国	1	1	1
0	石三引	2	1	1
0	吴红年	2	1	1
0	赵宏成	1	2	2
0	袁贵德	1	1	1
0	韩可平	1	1	1
0	黄维河	1	1	1
0	黄宝凤	2	1	1
0	万本立	1	1	1
0	施运凤	2	1	1
0	唐传英	2	1	1
0	唐得坤	1	1	1
0	洪传琴	2	1	1
0	梁加齐	1	1	1
0	操冬梅	2	1	1
0	王培群	2	1	1
0	韦俊荣	1	1	1
0	刘翠英	2	1	1
0	阮永华	1	1	1
0	吴子元	1	1	1
0	董家伟	1	1	1
0	朱利生	1	1	1
0	田水枝	1	1	0
0	管孝杰	1	1	1
0	朱彬	1	1	1
0	张本柱	1	1	1
0	王以品	1	1	1
0	李昌发	1	1	1
0	吴翠华	2	1	1
0	王献邦	1	1	1
0	钱之英	2	1	1
0	徐光升	1	1	1
0	计永岑	1	1	1
0	王义虎	1	1	1
0	叶爱华	2	1	1
0	付国平	1	1	1
0	项爱华	2	1	1
0	王定安	2	1	1
0	赵秀风	2	1	1
0	王新宝	1	1	1
0	安永之	2	1	1
0	刘善华	2	1	1
0	李斌	1	1	1
0	严国民	2	1	1
0	祝传伦	1	1	1
0	时金木	1	1	1
0	束学菊	2	1	1
0	吕德芹	2	1	1
0	张跃芬	2	1	1
0	刘永珍	2	1	1
0	赵九泉	1	1	1
0	汤健	1	1	1
0	陈志伟	1	1	1
0	吴启顺	1	1	1
0	崔国秀	2	1	1
0	刘智凤	2	1	1
0	邹国荣	1	1	1
0	黄道胜	1	1	1
0	黄南生	2	1	1
0	魏妧珍	2	1	1
0	葛明珍	2	1	1
0	胡勇	1	1	1
0	黄明理	1	1	1
0	黄荣桂	2	1	1
0	王保家	1	1	1
0	邓仁娥	2	1	1
0	郑朗	1	1	1
0	吴翠红	2	1	1

## Sheet: Sheet1
		录入员姓名												（基线评估）腹部CT检查				（基线评估）直肠MRI检查						基线CEA （ng/ml）	CA199	请录+1:37入贵院以及科室的标准名称	手术治疗																		并发症相关				术后病理诊断
			性别	出生日期		入院日期	出院日期	住院天数	身高（cm）	体重（kg）	BMI（kg/m2）	直肠肿瘤下缘距肛缘距离(cm)	肠镜病理（腺癌）	肝转移	T分期	N分期	M分期	DIS:肿瘤下端至肛缘距离	T分期 肿瘤侵犯深度	A肛门复合体评估	N淋巴结评估	C直肠圆周切除边缘评估	E肌层外血管侵犯评估				切除等级	手术者	手术入路	腹膜反折切开点	邓氏筋膜	系膜完整性	裸露精囊腺	术中探查肿瘤部位	手术时间（min）	术中出血量（mL）	有无中转开腹	淋巴结清扫级别	吻合方式	是否完整结肠系膜切除术（CME）	是否全直肠系膜切除术（TME）	直肠术式	预防性造口	术后进流质时间（天）	有无并发症	并发症种类	并发症Clavien-Dindo分级	吻合口漏分级（若有吻合口漏）	肿瘤部位
编号	电话		1男 2女	YYYYMMDD		YYYYMMDD	YYYYMMDD						0.未评估 1.高分化 2.中分化 3 .低分化 4.粘液腺癌 5.印戒细胞癌 6.其他	0.未评估 1.有 2.无 3.未知	0.未评估 1.T1：侵犯粘膜下层 2.T2：侵犯肌层 3.T3：侵及浆膜下或者固有筋膜下 4.T4a：侵透浆膜 5.T4b：侵犯其他器官 6.未知	0.未评估 1.Nx区域淋巴结无法评价 2.N0无区域淋巴结转移 3.N1有1-3枚区域淋巴结转移或浆膜下、肠系膜、无腹膜覆盖结肠 / 直肠周围组织内有肿瘤种植而无区域淋巴结转移 4.N2 4枚及更多区域淋巴结转移 5.未知	0.未评估 1.M0无远处转移 2.M1a远处转移局限于单个器官（如肝，肺，卵巢，非区域淋巴结），但没有腹膜转移 3.M1b远处转移分布于一个以上的器官 4.M1c腹膜转移有或没有其他器官转移 5.未知	0.未评估 1.低位（<6CM) 2.中位（6-12CM) 3.高位（>12CM） 4.未知	0.未评估 1.T1：侵犯粘膜下层 2.T2：侵犯肌层 3.T3：超过固有肌层 4.T3a：超过固有肌层<1mm 5.T3b：超过固有肌层1-5mm 6.T3c：超过固有肌层5-15mm 7.T3d：超过固有肌层>15mm 8.T4a：侵犯腹膜反折处（高位直肠肿瘤>10cm） 9.T4b：侵犯其他器官 10.未知	0.未评估 1.受侵 2.未受侵 3.未知	0.未评估 1.N0:无淋巴结转移 2.N1：1-3个淋巴结转移 3.N2：>3个淋巴结转移 4.未知	0.未评估 1.直肠筋膜无侵犯 2.直肠筋膜有侵犯（肿瘤、转移灶、转移淋巴结或肌层外脉管侵犯距离直肠筋膜1mm以内考虑CRM侵犯） 3.未知	0.未评估 1.是 2.否 3.未知			0.未评估 1. I期 2. II期 3. III期 4. IV期 5. 未知	0.未评估 1.R0 2. R1 3. R2	1李永翔2张尚鑫3.	1.开腹 2.腹腔镜辅助 3完全腹腔镜 4.机器人	1.腹膜反折最低点2腹膜反折上1cm	1邓氏筋膜前2邓氏筋膜后3无法辨认	1完整2较完整3不完整	0.无精囊腺 1.有被膜覆盖2部分被膜覆盖3完全裸露4损伤阴道或出血	1，直肠上段 2，直肠中段 3，直肠下段 4，肛管			0，无 1，有	0.未评估 1.D1 2.D2 3.D3 4.不明确	1.器械吻合 2.手工吻合 3.不明确	0.未评估 1.是 2.否 3.不明确	0.未评估 1.是 2.否 3.不明确	0.未评估 1.AR 2.LAR 3.APR 4. Hartmann 5.ISR 6.TaTME 7,其他	0.无造口 1.末端回肠双腔造口 2.横结肠双腔造口 3.乙状结肠单腔造口 4.其他 5.不明确		0.未评估 1.有 2.无 3.不明确	0.未评估 1.吻合口漏 2.切口部位感染 3.术后腹腔出血 4.消化道出血 5.腹腔内感染 6.肺部感染 7.泌尿系统感染 8.乳糜漏 9.术后肠梗阻 10.心血管意外 11.脑血管意外 12.血栓性疾病 13.其他 14.不明确	0.未评估 1：术后出现不需要药物、外科、内镜以及反射介入治疗的并发症，但包括药物治疗止吐药、退烧药、止痛药、利尿药、电介质、理疗，同样包括切口感染在床边打开 2：需要药物治疗不包括I期用药的患者，切口感染需要抗生素治疗，输血和全肠外营养包括在内 3：需要外科、内镜、放射介入治疗 4：威胁生命的并发症（包括中枢神经系统并发症）需要IC（间断监护）或ICU处理，脏器衰竭（包括透析） 5：死亡 6.不明确	0.未评估 1.A级：不需特殊治疗 2.B级：需非手术的特殊治疗（抗生素、介入置管等） 3.C级：手术治疗 4.不明确	1 .右半结肠 2.横结肠 3.降结肠 4.乙状结肠 5.直肠 6.未知
机器人	机器人	机器人	机器人	机器人	年龄	机器人	机器人		机器人	机器人	机器人	机器人	机器人	机器人	机器人	机器人	机器人	机器人	机器人	机器人	机器人	机器人	机器人	机器人	机器人	机器人	机器人	机器人	机器人					机器人	机器人	机器人	机器人	机器人
2014099376	13067870386	张少周	1	1970-12-09	49	2014-12-09	2015-01-01	23	175	62	20.2449	4	2	2	3	2	1	1	3	2	1	1	2	2.94	12.81	2	1	李永翔/张尚鑫	4	1	3	2	1	3	300	20	0	2	1	2	1	3	3	2	2	0	0	0	5
2015039554	18098768739	汤玉如	1	1951-06-23	68	2015-05-15	2015-06-01	17	175	68	22.2041	8	2	2	3	1	1	2	4	2	1	1	2	4.98	54.72	2	1	李永翔/张尚鑫	4	1	3	2	1	2	190	100	0	2	1	1	1	2	0	3	2	0	0	0	5
2015038717	13956065730	樊传洋	1	1956-07-16	63	2015-05-13	2015-05-27	14	168	48	17.0068	5	2	2	3	3	1	1	3	2	2	1	2	63.1	21.58	2	1	李永翔/张尚鑫	4	1	3	2	1	3	180	30	0	2	1	1	1	2	0	4	2	0	0	0	5
2015043287	13865982984	申白云	1	1960-09-26	59	2015-05-28	2015-06-12	15	173	70	23.3887	5	3	2	3	3	1	1	3	2	2	1	2	3	14.55	2	1	李永翔/张尚鑫	4	1	3	3	1	3	240	20	0	2	1	1	1	2	0	2	2	0	0	0	5
2015051227	15151664157	龚万华	1	1952-10-07	67	2015-06-25	2015-07-15	20	169	50	17.5064	3	6	2	2	2	1	1	2	2	1	1	2	16.9	15.15	1	1	李永翔/张尚鑫	4	1	3	2	1	3	350	80	0	2	1	2	1	3	3	2	2	0	0	0	5
2015080140	18755139689	宣正炎	1	1945-05-04	74	2015-10-05	2015-10-21	16	172	78	26.3656	5	2	2	4	2	1	1	6	2	1	1	2	3.43	12.7	2	1	李永翔/张尚鑫	4	1	3	2	1	3	390	60	0	2	1	1	1	2	0	3	2	0	0	0	5
2015080692	13773673038	韩玉兵	1	1970-01-01	50	2015-10-06	2015-10-15	9	175	70	22.8571	3	2	2	2	2	1	1	2	2	1	1	2	4.37	35.96	1	1	李永翔/张尚鑫	4	1	3	2	1	3	180	20	0	2	1	1	1	3	3	3	2	0	0	0	5
2015081705	18505646646	柴树修	1	1940-01-01	80	2015-10-10	2015-10-20	10	169	48	16.8061	4	2	2	3	3	1	1	3	2	2	1	2	11.05	32.34	3	1	李永翔/张尚鑫	4	1	3	2	1	3	180	10	0	2	1	1	1	2	0	4	2	0	0	0	5
2015047437	13966318830	骆耀田	1	1952-03-23	67	2015-10-25	2015-11-06	12	172	54	18.2531	3	2	2	4	2	1	1	8	1	1	2	2	11.65	17.35	2	1	李永翔/张尚鑫	4	1	3	2	1	3	270	200	0	2	1	1	1	3	3	2	1	5	3	3	5
2015088984	13564422549	陈新杰	1	1952-06-14	67	2015-11-03	2015-11-21	18	175	72	23.5102	5	2	2	2	2	1	1	2	2	1	1	2	1.62	10.79	1	1	李永翔/张尚鑫	4	1	3	2	1	3	345	50	0	2	1	1	1	2	0	3	2	0	0	0	5
2015089605	15955421286	刘玉潭	1	1946-12-11	73	2015-11-04	2015-11-16	12	172	51	17.239	2	2	2	3	2	1	1	3	2	1	1	2	16.06	10.59	2	1	李永翔/张尚鑫	4	1	3	2	1	3	195	20	0	2	1	1	1	3	3	2	2	0	0	0	5
2015103833	13956900919	郑礼贤	1	1945-06-04	74	2015-12-24	2016-01-11	18	169	69	24.1588	10	4	2	4	4	1	2	8	2	3	1	2	6.81	43.06	3	1	李永翔/张尚鑫	4	1	3	2	1	2	270	100	0	2	1	1	1	2	0	3	2	0	0	0	5
2016000088	15205185664	张辉	1	1969-01-01	51	2016-01-01	2016-01-12	11	173	67	22.3863	3	2	2	3	2	1	1	3	2	1	1	2	5.08	49.48	2	1	李永翔/张尚鑫	4	1	2	1	2	3	240	100	0	2	1	2	1	3	3	2	2	0	0	0	5
2016008671	18355187664	杨永胜	1	1938-02-16	81	2016-01-30	2016-02-06	7	175	68	22.2041	2.5	2	2	3	2	1	1	3	2	1	1	2	9.53	8.33	2	1	李永翔/张尚鑫	4	1	2	1	1	3	300	20	0	2	1	1	1	3	3	2	2	0	0	0	5
2016013354	18756450626	方有元	1	1973-02-15	46	2016-02-18	2016-03-08	19	176	73	23.5666	5	6	2	2	2	1	1	2	2	1	1	2	1.77	6.33	2	1	李永翔/张尚鑫	4	1	2	1	1	3	255	100	0	2	1	2	1	2	0	4	2	0	0	0	5
2016024930	18855420418	岳昌雁	1	1960-09-14	59	2016-03-25	2016-04-11	17	154	60	25.2994	4	2	2	3	2	1	1	3	2	1	1	2	3.34	13.93	2	1	李永翔/张尚鑫	4	1	2	1	1	3	210	50	0	2	1	1	1	3	3	3	2	0	0	0	5
2016027011	13733075420	秦建军	1	1968-03-25	51	2016-04-01	2016-04-20	19	174	68	22.46	3	2	2	3	2	1	1	3	2	1	1	2	6.5	16.98	2	1	李永翔/张尚鑫	4	1	2	1	1	3	360	20	0	2	1	1	1	3	3	6	2	0	0	0	5
2016038920	13956149654	程广侠	1	1962-01-03	58	2016-05-10	2016-06-07	28	168	50	17.7154	5	2	2	2	2	1	1	2	2	1	1	2	3.17	16.48	2	1	李永翔/张尚鑫	4	1	2	1	1	3	255	100	0	2	1	2	1	2	1	5	1	3	3	3	5
2016052426	13655588721	毛建华	1	1953-04-05	66	2016-06-24	2016-07-08	14	175	71	23.1837	5	2	2	3	2	1	1	3	2	1	1	2	3.68	31.97	2	1	李永翔/张尚鑫	4	1	2	1	1	3	220	20	0	2	1	1	1	4	3	2	2	0	0	0	5
2016052728	13349203920	宋华伦	1	1954-08-13	65	2016-06-25	2016-07-11	16	176	67	21.6296	14	2	2	3	2	1	3	4	2	1	1	2	6.29	14.7	3	1	李永翔/张尚鑫	4	1	2	1	1	1	170	50	0	2	1	1	1	2	0	3	2	0	0	0	5
2016054463	18656625188	李新	1	1967-03-21	52	2016-06-30	2016-07-15	15	178	88	27.7743	4	2	2	3	2	1	1	3	2	1	1	2	2.02	5.12	2	1	李永翔/张尚鑫	4	1	2	1	1	3	340	50	0	2	1	1	1	2	1	2	2	0	0	0	5
2015093619	13956973032	李于杰	1	1932-09-13	87	2016-10-20	2016-11-10	21	178	70	22.0932	3	2	2	4	3	1	1	8	2	2	1	2	19.02	23.61	3	1	李永翔/张尚鑫	4	1	2	1	1	3	210	40	0	2	1	1	1	5	1	2	2	0	0	0	5
2016092159	18949060000	汤新备	1	1955-01-01	65	2016-11-03	2016-11-20	17	178	85	26.8274	6	2	2	2	2	1	2	2	2	1	1	2	5.2	7.26	1	1	李永翔/张尚鑫	4	1	2	1	1	2	270	30	0	2	1	1	1	5	1	3	2	0	0	0	5
2016092180	13855850573	谢振彬	1	1972-05-16	47	2016-11-03	2016-11-20	17	176	75	24.2123	14	6	2	1	2	1	3	1	2	1	1	2	3.48	7.31	1	1	李永翔/张尚鑫	4	1	2	1	2	1	180	20	0	2	1	1	2	2	0	2	2	0	0	0	5
2016095639	17756060535	韩修学	1	1958-03-15	61	2016-11-15	2016-11-26	11	172	63	21.2953	6	2	2	4	2	1	2	8	2	1	1	2	3.84	2.5	2	1	李永翔/张尚鑫	4	1	2	1	1	1	180	20	0	2	1	1	1	2	0	4	2	0	0	0	5
2016094729	13955162682	杨义生	1	1954-12-15	65	2016-11-19	2016-11-25	6	172	75	25.3515	3	4	2	4	2	1	1	8	2	1	1	2	26	6.83	2	1	李永翔/张尚鑫	4	1	2	1	2	3	380	20	0	2	1	1	1	2	1	2	2	0	0	0	5
2016098347	18994581598	陶良存	1	1951-09-19	68	2016-11-23	2016-12-28	35	169	51	17.8565	2	2	2	3	2	1	1	3	2	1	1	2	19.26	17.36	2	1	李永翔/张尚鑫	4	1	2	1	2	3	210	20	0	2	1	1	1	3	3	3	2	0	0	0	5
2017012415	18221349066	张多伍	1	1978-01-23	41	2017-02-13	2017-03-02	17	173	61	20.3816	2	2	2	3	2	1	1	3	2	1	1	2	5.3	9.79	2	1	李永翔/张尚鑫	4	1	2	2	1	3	200	100	0	2	1	1	1	3	3	2	2	0	0	0	5
2017016142	13856916418	李跃树	1	1942-04-18	77	2017-02-25	2017-03-10	13	175	57	18.6122	8	2	2	4	2	1	2	3	2	1	1	2	5.96	18.07	2	1	李永翔/张尚鑫	4	1	2	2	1	2	120	50	0	2	1	1	1	2	0	5	2	0	0	0	5
2017018350	13170059655	宣贤才	1	1963-03-06	56	2017-03-02	2017-03-21	19	172	85	28.7317	2	2	2	4	2	1	1	7	2	1	1	2	3	48.72	1	1	李永翔/张尚鑫	4	1	2	1	1	3	350	20	0	2	1	1	1	3	3	3	2	0	0	0	5
2017021854	18214758187	王立岚	1	1974-08-29	45	2017-03-14	2017-03-26	12	174	68	22.46	4	2	2	4	2	1	1	7	2	1	1	2	5.08	10.9	1	1	李永翔/张尚鑫	4	1	2	1	1	3	240	50	0	2	1	1	1	2	1	3	2	0	0	0	5
2017029135	13955273505	张中其	1	1964-03-23	55	2017-04-06	2017-04-25	19	168	72	25.5102	5	3	2	3	2	1	1	7	2	1	1	2	2.56	6.47	3	1	李永翔/张尚鑫	4	1	2	1	1	3	240	40	0	2	1	1	1	2	1	2	2	0	0	0	5
2017029412	18298023015	李结军	1	1988-03-13	31	2017-04-07	2017-04-18	11	170	57	19.7232	3.5	2	2	2	2	1	1	2	2	1	1	2	1.24	7.15	1	1	李永翔/张尚鑫	4	1	2	1	1	3	210	100	0	2	1	1	1	2	1	2	1	4	2	2	5
2017029688	13956075296	谈正国	1	1946-09-13	73	2017-04-07	2017-04-21	14	170	58	20.0692	5	2	2	3	2	1	1	3	2	1	1	2	2.32	20.61	2	1	李永翔/张尚鑫	4	1	2	1	1	3	210	100	0	2	1	1	1	2	1	2	2	0	0	0	5
2017030958	18755494925	廖国林	1	1964-01-05	56	2017-04-11	2017-04-25	14	172	70	23.6614	6	2	2	3	2	1	2	4	2	1	1	2	3.64	7.13	2	1	李永翔/张尚鑫	4	1	2	1	1	3	180	100	0	2	1	2	1	2	1	2	2	0	0	0	5
2017032036	15395181791	李家年	1	1962-12-01	57	2017-04-15	2017-04-27	12	160	64	25	8	6	2	3	2	1	2	3	2	1	1	2	1.7	15.92	2	1	李永翔/张尚鑫	4	1	2	1	1	2	150	100	0	2	1	1	1	2	1	2	2	0	0	0	5
2017032281	13956780123	吴义禄	1	1946-09-05	73	2017-04-16	2017-04-26	10	173	67	22.3863	5	2	2	4	2	1	1	7	2	1	1	2	5.77	9.87	1	1	李永翔/张尚鑫	4	1	2	1	1	3	240	80	0	2	1	1	1	2	1	1	2	0	0	0	5
2017009818	18317157961	马艳	1	1977-04-01	42	2017-04-20	2017-05-09	19	175	74	24.1633	3	3	2	3	3	1	1	3	2	2	1	2	12.31	24.27	3	1	李永翔/张尚鑫	4	1	2	1	1	3	345	50	0	2	1	1	1	3	3	3	2	0	0	0	5
2017008290	13524469850	琚炳超	1	1964-02-15	55	2017-04-20	2017-05-02	12	172	61	20.6193	5	3	2	3	3	1	1	3	2	2	1	2	3.61	12.68	3	1	李永翔/张尚鑫	4	1	2	1	1	3	200	100	0	2	1	1	1	2	0	3	2	0	0	0	5
2017033920	18725513581	项以和	1	1937-03-31	82	2017-04-20	2017-05-04	14	170	53	18.3391	5	2	2	4	2	1	1	7	2	1	1	2	2.01	15.79	1	1	李永翔/张尚鑫	4	1	2	1	1	3	220	10	0	2	1	1	1	2	1	2	2	0	0	0	5
2017039744	15256054796	张法海	1	1948-02-02	71	2017-05-16	2017-05-27	11	164	71	26.398	2	2	2	4	2	1	1	7	2	1	1	2	0.42	13.67	1	1	李永翔/张尚鑫	4	1	2	2	1	3	250	50	0	2	1	1	1	2	1	2	2	0	0	0	5
2017042797	15555463269	聂忠华	1	1972-10-03	47	2017-05-18	2017-06-01	14	171	67.4	23.0498	5	1	2	3	3	1	1	3	2	2	1	2	8.05	14.16	3	1	李永翔/张尚鑫	4	1	2	2	1	3	90	50	0	2	1	1	1	2	0	5	2	0	0	0	5
2017016933	13805670616	段子亮	1	1969-04-24	50	2017-06-12	2017-06-24	12	171	63	21.5451	15	2	2	3	3	1	3	3	2	2	1	2	39.29	4.89	3	1	李永翔/张尚鑫	4	1	2	2	1	1	100	100	0	2	1	1	1	2	0	3	2	0	0	0	5
2015004526	15155178223	余国干	1	1941-03-31	78	2017-07-30	2017-08-14	15	176	91	29.3776	5	2	2	3	2	1	1	3	2	1	1	2	16.28	27.75	2	1	李永翔/张尚鑫	4	1	2	2	1	3	180	100	0	2	1	1	1	3	3	3	2	0	0	0	5
2017068130	18155160714	吴明政	1	1973-10-08	46	2017-08-02	2017-08-14	12	175	74	24.1633	5	2	2	3	2	1	1	4	2	1	1	2	1.97	3.59	2	1	李永翔/张尚鑫	4	1	2	2	1	3	255	50	0	2	1	1	1	2	1	3	2	0	0	0	5
2017080126	13805511779	朱维军	1	1968-04-28	51	2017-09-07	2017-09-25	18	176	93	30.0232	4	2	2	3	2	1	1	3	2	1	1	2	2.07	4.5	2	1	李永翔/张尚鑫	4	1	2	2	1	3	430	100	0	2	1	2	1	3	3	4	2	0	0	0	5
2017058079	18325892888	王安平	1	1959-06-10	60	2017-09-14	2017-09-28	14	169	58	20.3074	5	2	2	4	3	1	1	8	2	1	1	2	1.38	2.87	3	1	李永翔/张尚鑫	4	1	2	2	1	3	180	50	0	2	1	1	1	2	0	3	2	0	0	0	5
2017059039	13041678502	王永年	1	1952-08-06	67	2017-10-10	2017-10-19	9	176	64	20.6612	2	2	2	3	2	1	1	4	2	1	1	2	3.02	16.78	3	1	李永翔/张尚鑫	4	1	2	2	1	3	240	50	0	2	1	2	1	3	3	3	2	0	0	0	5
2017092342	13731873696	胡孔国	1	1964-08-12	55	2017-10-16	2017-10-27	11	174	70	23.1206	7	2	2	3	2	1	2	5	2	1	1	2	2.47	34.97	2	1	李永翔/张尚鑫	4	1	2	2	2	2	200	100	0	2	1	2	1	2	0	4	2	0	0	0	5
2017065125	13965076807	沃永发	1	1950-06-23	69	2017-11-20	2017-12-07	17	173	57	19.0451	4	2	2	4	2	1	1	8	2	1	2	2	3.17	15.56	4	1	李永翔/张尚鑫	4	1	2	1	3	3	180	120	0	2	1	1	1	3	3	3	2	0	0	0	5
2017106988	13965059668	董光峰	1	1956-06-19	63	2017-12-01	2017-12-16	15	178	90	28.4055	7	6	2	4	2	1	2	5	2	1	1	2	0.79	47.57	3	1	李永翔/张尚鑫	4	1	2	1	1	2	330	100	0	2	1	1	2	2	0	4	2	0	0	0	5
2017111756	13023008047	胡国良	1	1949-01-07	70	2017-12-17	2018-01-09	23	172	63	21.2953	3	2	2	3	2	1	1	4	2	1	1	2	5.09	39.31	2	1	李永翔/张尚鑫	4	1	2	1	1	3	230	100	0	2	1	2	1	3	3	3	2	2	2	2	5
2018012766	18019937068	张国友	1	1954-04-25	65	2018-02-13	2018-02-28	15	165	68	24.977	5	2	2	3	2	1	1	4	2	1	1	2	14.33	28.96	2	1	李永翔/张尚鑫	4	2	1	1	1	3	270	50	0	2	1	2	1	2	1	3	2	0	0	0	5
2018013105	15955176613	陶东升	1	1963-01-01	57	2018-02-16	2018-03-04	16	169	65	22.7583	3	2	2	3	2	1	1	3	2	1	1	2	2.19	7.54	2	1	李永翔/张尚鑫	4	2	1	1	1	3	240	100	0	2	1	2	1	3	3	3	2	0	0	0	5
2018024242	18256962763	陶余庭	1	1963-01-01	57	2018-03-22	2018-04-03	12	174	75	24.7721	4	2	2	3	2	1	1	7	2	1	1	2	1.26	23	3	1	李永翔/张尚鑫	4	2	1	1	1	3	150	50	0	2	1	2	1	5	0	4	2	0	0	0	5
2018026072	13511087669	柴助学	1	1965-01-01	55	2018-03-27	2018-04-09	13	172	80	27.0416	4	2	2	3	2	1	1	3	2	2	1	2	2.08	6.38	2	1	李永翔/张尚鑫	4	2	1	1	1	3	180	50	0	2	1	2	1	5	1	3	2	0	0	0	5
2018028337	18297999209	吴自宏	1	1967-01-01	53	2018-04-04	2018-04-19	15	170	75	25.9516	5	2	2	3	2	1	1	3	2	1	1	2	1.37	8.33	2	1	李永翔/张尚鑫	4	2	1	1	1	3	240	100	0	2	1	2	1	2	2	3	2	0	0	0	5
2018033871	13696659846	李春华	1	1967-01-01	53	2018-04-20	2018-05-04	14	174	78	25.763	3	2	2	3	2	1	1	4	2	1	1	2	5.17	20.89	2	1	李永翔/张尚鑫	4	2	1	1	1	3	230	100	0	2	1	2	1	3	3	3	2	0	0	0	5
2018035275	13514983939	张建	1	1958-01-01	62	2018-04-25	2018-05-06	11	173	70	23.3887	4	2	2	3	2	1	1	4	2	1	1	2	3.45	10.52	2	1	李永翔/张尚鑫	4	2	1	1	1	3	300	100	0	2	1	2	1	5	1	3	2	0	0	0	5
2018035324	13466400664	王学奎	1	1966-10-10	53	2018-04-25	2018-05-11	16	174	76	25.1024	3	2	2	3	2	1	1	4	2	1	1	2	3.47	9.62	2	1	李永翔/张尚鑫	4	2	1	2	1	3	220	20	0	2	1	2	1	3	3	3	2	0	0	0	5
2018055320	13955868387	付自强	1	1927-10-12	92	2018-06-27	2018-07-12	15	170	78	26.9896	5	2	2	3	2	1	1	3	2	1	1	2	24.25	3.19	2	1	李永翔/张尚鑫	4	2	1	2	1	3	180	50	0	2	1	2	1	2	1	3	2	0	0	0	5
2018061984	15178606545	王小流	1	1968-12-12	51	2018-07-18	2018-07-31	13	172	75	25.3515	4	2	2	2	2	1	1	2	2	1	1	2	4.48	9.18	1	1	李永翔/张尚鑫	4	2	1	2	1	3	280	20	0	2	1	2	1	2	1	4	2	0	0	0	5
2018064166	13865944384	王前付	1	1966-08-09	53	2018-07-25	2018-08-02	8	173	71	23.7228	5	2	2	3	3	1	1	4	2	1	1	2	2.85	10.93	1	1	李永翔/张尚鑫	4	2	1	1	1	3	210	20	0	2	1	2	1	2	1	4	2	0	0	0	5
2018083086	13966476907	郑家辉	1	1964-03-02	55	2018-09-25	2018-10-08	13	173	66	22.0522	4	2	2	4	2	1	1	8	2	1	1	2	1.94	10.63	2	1	李永翔/张尚鑫	4	2	1	1	1	3	620	50	0	2	1	2	1	2	1	3	2	0	0	0	5
2018086453	13865723851	胡申付	1	1971-11-05	48	2018-10-07	2018-10-17	10	174	68	22.46	5	3	2	3	3	1	1	4	2	2	1	2	2.87	3.25	3	1	李永翔/张尚鑫	4	2	1	1	1	3	270	20	0	2	1	2	1	3	3	3	2	0	0	0	5
2018092258	13966849320	张天山	1	1954-06-07	65	2018-10-25	2018-11-07	13	173	74	24.7252	4	2	2	2	2	1	1	2	2	1	1	2	4.15	15.16	1	1	李永翔/张尚鑫	4	1	2	1	1	3	290	20	0	2	1	2	1	2	1	3	2	0	0	0	5
2018097607	13669764884	陈主发	1	1944-09-08	75	2018-11-11	2018-11-22	11	175	66	21.551	5	2	2	2	2	1	1	2	2	1	1	2	0.78	9.56	1	1	李永翔/张尚鑫	4	1	2	1	1	3	240	50	0	2	1	2	1	2	1	4	2	0	0	0	5
2018045599	18297966689	程顺华	1	1947-10-07	72	2018-11-17	2018-12-09	22	173	61	20.3816	6	2	2	2	2	1	1	2	2	1	1	2	4	15	1	1	李永翔/张尚鑫	4	1	2	1	1	2	360	50	0	2	1	2	1	2	1	4	2	0	0	0	5
2018079029	15156213567	李治东	1	1964-03-02	55	2018-11-29	2018-12-13	14	172	72	24.3375	5	2	2	3	2	1	1	3	2	1	1	2	7.32	51.76	2	1	李永翔/张尚鑫	4	1	2	1	2	3	270	20	0	2	1	2	1	2	1	4	2	0	0	0	5
2014008355	13856013175	李世普	1	1939-09-07	80	2018-12-05	2018-12-29	24	172	62	20.9573	3	6	2	3	2	1	1	3	2	1	1	2	3.96	12.34	2	1	李永翔/张尚鑫	4	1	2	1	1	3	240	20	0	2	1	2	1	3	3	13	1	9	1	1	5
2018107705	15856901536	高峰	1	1968-03-08	51	2018-12-13	2018-12-26	13	176	77	24.858	5	2	2	3	2	1	1	3	2	1	1	2	2.79	4.82	2	1	李永翔/张尚鑫	4	1	2	1	1	3	330	20	0	2	1	2	1	2	1	3	2	0	0	0	5
2019004510	18326290222	徐忠存	1	1956-03-09	63	2019-01-13	2019-01-31	18	175	65	21.2245	6	2	2	3	2	1	1	3	2	1	1	2	3.58	15.47	4	1	李永翔/张尚鑫	4	1	2	1	1	3	380	20	0	2	1	2	1	2	1	3	2	0	0	0	5
2019466564	13665515825	王世明	1	1955-10-25	64	2019-02-02	2019-02-10	8	173	71	23.7228	4	2	2	3	2	1	1	4	2	1	1	2	2.79	14.26	2	1	李永翔/张尚鑫	4	1	2	1	1	3	330	20	0	2	1	2	1	2	1	3	2	0	0	0	5
2019477702	18712365266	何世华	1	1968-01-14	51	2019-03-06	2019-03-21	15	169	72	25.2092	5	2	2	3	2	1	1	4	2	1	1	2	1.35	5.4	2	1	李永翔/张尚鑫	4	1	2	1	1	3	400	20	0	2	1	2	1	2	1	3	2	0	0	0	5
2019501547	13565655565	唐永为	1	1952-01-31	67	2019-04-02	2019-05-09	37	174	66	21.7994	4	2	2	3	2	1	1	3	2	1	1	2	1.56	10.79	2	1	李永翔/张尚鑫	4	1	2	1	1	3	650	50	0	2	1	2	1	2	1	7	2	0	0	0	5
2019506866	18133615791	郑敏锐	1	1968-02-26	51	2019-04-19	2019-05-05	16	178	80	25.2493	2	2	2	3	2	1	1	3	2	1	1	2	0.8	6.99	2	1	李永翔/张尚鑫	4	1	2	1	1	3	270	20	0	2	1	2	1	1	1	3	2	0	0	0	5
2019526670	13361958623	程勋友	1	1958-02-04	61	2019-05-14	2019-05-27	13	170	61	21.1073	1.5	2	2	3	2	1	1	3	2	1	1	2	1.56	8.59	2	1	李永翔/张尚鑫	4	1	2	1	1	3	320	20	0	2	1	2	1	3	3	3	2	0	0	0	5
2019529002	13965362609	王玉树	1	1963-03-15	56	2019-05-21	2019-06-06	16	176	83	26.7949	6	2	2	3	3	1	2	8	2	3	1	2	2.26	8.42	4	1	李永翔/张尚鑫	4	1	2	2	1	3	240	20	0	2	1	2	1	2	1	5	1	3	3	3	5
2019569316	13655552211	夏培然	1	1944-06-24	75	2019-05-29	2019-06-28	30	170	76	26.2976	2	2	2	2	2	1	1	2	2	1	1	2	6.01	36.48	2	1	李永翔/张尚鑫	4	1	2	1	1	3	540	50	0	2	1	2	1	2	1	3	2	0	0	0	5
17163869	15395443720	尹若根	1	1960-01-21	59	2019-06-09	2019-06-27	18	170	48	16.609	6	2	2	3	3	1	2	5	2	3	1	2	2.66	4.5	3	1	李永翔/张尚鑫	4	2	2	1	1	2	255	20	0	2	1	2	1	2	1	3	2	0	0	0	5
17165171	13482786101	黄开应	1	1963-11-10	56	2019-06-12	2019-06-28	16	165	53	19.4674	6	6	2	2	2	1	1	3	2	1	1	2	2.89	2.52	3	1	李永翔/张尚鑫	4	2	2	1	1	3	300	20	0	2	1	2	2	2	1	3	2	0	0	0	5
17172876	18155165561	赵宜胜	1	1958-05-05	61	2019-06-27	2019-07-15	18	172	68	22.9854	5	2	2	2	2	1	1	6	2	1	1	2	0.75	4.7	3	1	李永翔/张尚鑫	4	2	2	1	1	3	295	30	0	2	1	2	1	2	1	2	2	0	0	0	5
17186610	18305185517	谢四平	1	1967-02-04	52	2019-07-26	2019-08-09	14	165	68	24.977	5	2	2	2	3	1	1	2	2	3	1	2	3.94	26.03	2	1	李永翔/张尚鑫	4	2	2	1	1	3	370	20	0	2	1	1	1	2	1	2	2	0	0	0	5
17191345	18896702238	王绍福	1	1958-04-23	61	2019-08-07	2019-08-16	9	166	70	25.4028	4	2	2	3	4	1	1	3	2	3	1	2	1.7	29.76	3	1	李永翔/张尚鑫	4	2	2	1	1	3	230	50	0	2	1	1	1	2	1	2	2	0	0	0	5
17211906	13955062581	王平	1	1966-03-11	53	2019-09-28	2019-10-21	23	175	65	21.2245	3.5	2	2	3	3	1	1	3	2	1	1	2	4.04	15.48	3	1	李永翔/张尚鑫	4	2	3	1	1	3	250	50	0	2	1	2	1	2	1	4	2	0	0	0	5
17201212	15955469815	胡建生	1	1948-06-06	71	2019-08-30	2019-09-17	18	168	62	21.9671	5	2	2	3	2	1	1	3	2	1	1	2	5.41	114.74	2	1	李永翔/张尚鑫	4	2	2	1	1	3	240	20	0	2	1	1	1	3	3	2	2	0	0	0	5
2014104691	13855444011	许克利	2	1958-10-20	61	2014-12-28	2015-01-14	17	159	57	22.5466	2	6	2	3	2	1	1	3	2	1	1	2	5.47	8.37	2	1	李永翔/张尚鑫	4	1	3	2	0	3	300	20	0	2	1	2	1	3	3	2	2	0	0	0	5
2015028713	15105518787	闫广兰	2	1937-05-01	82	2015-04-09	2015-04-28	19	165	70	25.7117	5	6	2	1	2	1	1	3	2	1	1	2	5.39	10.42	1	1	李永翔/张尚鑫	4	1	3	2	0	3	200	50	0	2	1	2	1	2	1	1	1	9	1	1	5
2015030364	13965002155	吴小妹	2	1957-10-08	62	2015-04-15	2015-04-29	14	160	54	21.0938	4	2	2	3	2	1	1	3	2	1	1	2	1.15	22.61	2	1	李永翔/张尚鑫	4	1	3	2	0	3	300	100	0	2	1	1	1	2	3	3	2	0	0	0	5
2015031622	13635566718	江新年	2	1950-12-07	69	2015-04-20	2015-04-30	10	161	48	18.5178	4	1	2	3	2	1	1	3	2	2	1	2	3.12	8.91	3	1	李永翔/张尚鑫	4	1	3	2	0	3	240	20	0	2	1	1	1	4	3	4	2	0	0	0	5
2015033004	13718656977	叶勤会	2	1933-12-23	86	2015-04-24	2015-05-07	13	159	55	21.7555	7	2	2	3	2	1	2	3	2	1	1	2	25.26	31.68	2	1	李永翔/张尚鑫	4	1	3	2	0	2	120	20	0	2	1	1	1	2	0	3	2	0	0	0	5
2015035301	13665656359	鲍金凤	2	1969-02-12	50	2015-05-02	2015-05-21	19	162	50	19.052	7	2	2	2	3	1	2	2	2	2	1	2	3.82	6.97	3	1	李永翔/张尚鑫	4	1	3	2	0	2	330	50	0	2	1	1	1	2	0	6	2	0	0	0	5
2015046289	13798923588	李春香	2	1981-06-08	38	2015-06-08	2015-06-20	12	161	70	27.0051	5	2	2	4	3	1	1	4	2	2	1	2	1.86	17.49	3	1	李永翔/张尚鑫	4	1	3	2	0	3	240	20	0	2	1	1	1	2	0	4	2	0	0	0	5
2015095443	18226782864	陈红仙	2	1974-02-14	45	2015-11-24	2015-12-10	16	165	58	21.3039	4	2	2	4	2	1	1	8	2	1	1	2	17.8	2.6	2	1	李永翔/张尚鑫	4	1	3	2	0	3	270	20	0	2	1	1	1	2	0	4	2	0	0	0	5
2015097531	15370337388	张贺云	2	1947-07-08	72	2015-12-02	2015-12-17	15	165	58	21.3039	1	2	2	2	2	1	1	2	2	1	1	2	3.28	19.46	1	1	李永翔/张尚鑫	4	1	3	2	0	3	230	20	0	2	1	1	1	3	3	2	2	0	0	0	5
2015098270	15005651516	蔡宝兰	2	1962-05-18	57	2015-12-04	2015-12-20	16	163	70	26.3465	5	2	2	4	2	2	1	8	2	1	1	2	2.53	5.29	3	1	李永翔/张尚鑫	4	1	3	2	0	1	250	10	0	2	1	1	1	2	0	6	2	0	0	0	5
2016009645	13956123897	吴玉会	2	1957-08-05	62	2016-02-04	2016-02-20	16	159	55	21.7555	12	3	2	4	4	1	2	4	2	3	1	2	3.94	0.6	3	1	李永翔/张尚鑫	4	1	3	1	0	2	270	10	0	2	1	1	1	2	0	3	2	0	0	0	5
2016020746	13470848725	张守华	2	1964-07-27	55	2016-03-14	2016-03-28	14	163	62	23.3355	4	3	2	2	2	1	1	2	2	1	1	2	1.47	10.49	1	1	李永翔/张尚鑫	4	1	3	1	0	1	180	80	0	2	1	1	1	2	0	4	2	0	0	0	5
2016022663	15955911199	翟守应	2	1974-02-01	45	2016-03-19	2016-04-01	13	165	58	21.3039	2	2	2	2	2	1	1	2	2	1	1	2	0.71	5.28	1	1	李永翔/张尚鑫	4	1	3	1	0	4	240	50	0	2	1	1	1	3	3	3	2	0	0	0	5
2016036206	13856401388	李瑞群	2	1940-04-12	79	2016-05-02	2016-05-12	10	159	61	24.1288	3	2	2	3	2	1	1	3	2	1	1	2	3.07	17.69	2	1	李永翔/张尚鑫	4	1	2	1	0	3	270	50	0	2	1	1	1	3	3	4	2	0	0	0	5
2016037651	13966735188	汤桂姐	2	1950-11-12	69	2016-05-06	2016-05-21	15	161	60	23.1473	9	2	2	3	2	1	2	3	2	1	1	2	0.36	15.22	2	1	李永翔/张尚鑫	4	1	2	1	0	2	180	10	0	2	1	1	1	2	0	2	2	0	0	0	5
2016038574	18949210826	孙金花	2	1983-03-23	36	2016-05-09	2016-05-24	15	162	49	18.6709	5	6	2	3	3	1	1	3	2	2	1	2	1.16	32.41	3	1	李永翔/张尚鑫	4	1	2	1	0	3	120	10	0	2	1	1	1	2	0	3	2	0	0	0	5
2016061979	13966273575	项其爱	2	1966-10-05	53	2016-07-25	2016-08-13	19	162	51	19.433	5	2	2	4	2	1	1	8	2	1	1	2	5.25	19.4	2	1	李永翔/张尚鑫	4	1	2	1	0	3	150	50	0	2	1	1	1	2	0	4	2	0	0	0	5
2016066304	15856933216	陈荣珍	2	1966-07-13	53	2016-08-08	2016-08-27	19	163	61	22.9591	5	2	2	3	2	1	1	3	2	1	1	2	5.8	7.16	2	1	李永翔/张尚鑫	4	1	2	1	0	3	190	50	0	2	1	1	1	2	0	6	2	0	0	0	5
2016092203	13705698093	费金香	2	1959-09-14	60	2016-11-03	2016-11-17	14	160	56	21.875	8	2	2	4	3	1	2	8	2	2	1	2	21.93	15.48	3	1	李永翔/张尚鑫	4	1	2	1	0	2	210	40	0	2	1	1	1	2	0	3	2	0	0	0	5
2016097489	15155800213	仇志兰	2	1969-08-06	50	2016-11-21	2016-12-04	13	162	62	23.6244	3	2	2	1	2	1	1	1	2	1	1	2	3.05	13.83	1	1	李永翔/张尚鑫	4	1	2	1	0	3	240	100	0	2	1	1	1	5	1	3	2	0	0	0	5
2016099602	18055196962	陈庭梅	2	1937-01-07	82	2016-11-28	2016-12-16	18	164	45	16.7311	6	6	2	1	2	1	2	1	2	1	1	2	1.99	44.9	1	1	李永翔/张尚鑫	4	1	2	1	0	3	120	20	0	2	1	1	1	2	1	3	2	0	0	0	5
2017023143	13915040102	罗保荣	2	1957-01-11	62	2017-03-17	2017-04-05	19	157	57	23.1247	4	2	2	1	3	1	1	1	2	2	0	2	1.86	35.74	2	1	李永翔/张尚鑫	4	1	2	1	0	3	150	100	0	2	1	1	1	2	1	2	2	0	0	0	5
2017024041	18905540933	董克英	2	1947-02-23	72	2017-03-20	2017-04-05	16	165	58	21.3039	5	2	2	2	2	1	2	2	2	1	1	2	4.87	7.82	1	1	李永翔/张尚鑫	4	1	2	1	0	3	120	100	0	2	1	1	1	2	0	4	2	0	0	0	5
2017024213	18355182655	姜金枝	2	1973-01-24	46	2017-03-21	2017-03-30	9	170	88	30.4498	2	2	2	3	3	1	1	3	2	2	1	2	50.72	26.3	3	1	李永翔/张尚鑫	4	1	2	1	0	3	290	20	0	2	1	1	1	3	3	3	2	0	0	0	5
2017027051	15555153168	陈国芳	2	1965-04-26	54	2017-03-30	2017-04-13	14	155	51	21.2279	5	3	2	2	3	1	1	2	2	2	1	2	3.39	12.81	3	1	李永翔/张尚鑫	4	1	2	1	0	3	210	30	0	2	1	1	1	2	1	1	2	0	0	0	5
2017051297	17755107828	陈存菊	2	1955-11-09	64	2017-06-14	2017-06-29	15	158	50	20.0288	6	2	2	3	2	1	2	3	2	1	1	2	3.45	12.55	2	1	李永翔/张尚鑫	4	1	2	2	0	3	180	30	0	2	1	1	1	2	1	2	2	0	0	0	5
2017063723	13167745807	张德秀	2	1948-08-20	71	2017-07-20	2017-08-02	13	158	51.5	20.6297	4	2	2	3	2	1	1	3	2	1	1	2	2.51	3.12	2	1	李永翔/张尚鑫	4	1	2	2	0	3	220	50	0	2	1	1	1	5	1	3	2	0	0	0	5
2017092277	13605694216	许长英	2	1953-12-08	66	2017-10-16	2017-11-01	16	159	54	21.3599	8	2	2	3	2	1	2	3	2	1	1	2	3.48	14.38	2	1	李永翔/张尚鑫	4	1	2	1	0	2	150	50	0	2	1	2	1	2	0	4	2	0	0	0	5
2017095435	15855001016	韩德玉	2	1950-05-20	69	2017-10-25	2017-11-07	13	161	56	21.6041	9	2	2	3	3	1	2	4	2	2	1	2	1.07	6.85	3	1	李永翔/张尚鑫	4	1	2	1	0	2	120	50	0	2	1	2	1	2	0	4	1	9	3	3	5
2017101522	18714823727	张术华	2	1950-04-23	69	2017-11-13	2017-11-24	11	171	51	17.4413	3	2	2	2	3	1	1	2	2	1	1	2	5.67	18.06	2	1	李永翔/张尚鑫	4	1	2	1	0	3	180	100	0	2	1	2	1	3	3	3	2	0	0	0	5
2017111787	15797707174	刘敏华	2	1973-11-18	46	2017-12-17	2018-01-02	16	162	55	20.9572	4	2	2	3	2	1	1	4	2	1	1	2	1.91	22.93	2	1	李永翔/张尚鑫	4	1	2	1	0	3	260	100	0	2	1	1	1	5	1	3	2	0	0	0	5
2018008077	17717643909	将爱云	2	1958-02-23	61	2018-01-26	2018-02-07	12	163	72	27.0993	4	6	2	3	2	1	1	3	2	1	1	2	2.98	4.36	2	1	李永翔/张尚鑫	4	2	2	1	0	3	220	50	0	2	1	2	1	2	1	3	2	0	0	0	5
2018015430	13905544962	李玲	2	1964-05-08	55	2018-02-23	2018-03-07	12	157	65	26.3702	6	2	2	3	2	1	2	3	2	1	1	2	2.38	10.45	2	1	李永翔/张尚鑫	4	2	2	1	0	3	320	50	0	2	1	2	1	2	0	4	2	0	0	0	5
2018016817	18726489800	王家珍	2	1964-06-05	55	2018-02-27	2018-03-13	14	161	62	23.9188	7	2	2	3	2	1	2	3	2	1	1	2	16.71	106.39	2	1	李永翔/张尚鑫	4	2	2	1	0	2	180	50	0	2	1	2	1	2	0	3	2	0	0	0	5
2018040293	13955106150	尹树美	2	1965-03-02	54	2018-05-10	2018-05-23	13	159	55	21.7555	2	2	2	3	2	1	1	3	2	1	1	2	2.44	2.49	1	1	李永翔/张尚鑫	4	2	1	2	0	3	240	50	0	2	1	2	1	3	3	3	2	0	0	0	5
2018041641	15395038939	李庆芹	2	1964-05-01	55	2018-05-15	2018-05-25	10	161	67	25.8478	5	2	2	4	3	1	1	6	2	2	1	2	0.95	6.62	4	1	李永翔/张尚鑫	4	2	1	2	4	3	180	20	0	2	1	2	1	2	1	3	2	0	0	0	5
2018057746	13637088099	王伟琴	2	1954-05-06	65	2018-07-05	2018-07-26	21	158	62	24.8358	2	3	2	3	3	1	1	5	2	1	1	2	1.54	3.47	2	1	李永翔/张尚鑫	4	2	1	2	0	3	200	50	0	2	1	2	1	3	3	4	2	0	0	0	5
2018059593	18395561281	储秀珍	2	1969-02-03	50	2018-07-10	2018-07-27	17	158	61	24.4352	5	2	2	4	3	1	1	8	2	2	1	2	0.91	6.51	3	1	李永翔/张尚鑫	4	2	1	2	4	3	260	50	0	2	1	2	1	2	1	4	2	0	0	0	5
2018070593	15056944658	姚燕海	2	1970-03-03	49	2018-08-14	2018-08-31	17	158	55	22.0317	3	2	2	2	2	1	1	2	2	1	1	2	1.01	8.56	1	1	李永翔/张尚鑫	4	2	1	1	0	3	180	20	0	2	1	2	1	3	3	4	2	0	0	0	5
2018083362	18221206675	赵陈氏	2	1953-10-06	66	2018-09-25	2018-10-07	12	158	53	21.2306	5	2	2	3	2	1	1	5	2	1	1	2	1.28	5.51	2	1	李永翔/张尚鑫	4	2	1	1	0	3	400	50	0	2	1	2	1	2	1	4	2	0	0	0	5
2018090089	18550586627	吴小琼	2	1987-10-12	32	2018-10-18	2018-11-02	15	163	54	20.3244	3	3	2	4	3	1	1	8	1	1	2	2	2.43	4.56	4	1	李永翔/张尚鑫	4	2	1	1	4	3	210	50	0	2	1	2	1	3	3	3	2	0	0	0	5
2018103130	15155433414	陈传芳	2	1934-04-05	85	2018-11-28	2018-12-11	13	162	55	20.9572	3	2	2	3	2	1	1	2	2	1	1	2	3.24	14.67	2	1	李永翔/张尚鑫	4	1	1	1	4	3	240	50	0	2	1	2	1	3	3	3	2	0	0	0	5
2018105914	13856913269	张吉萍	2	1935-06-05	84	2018-12-07	2018-12-20	13	156	55	22.6003	7	2	2	2	4	1	2	2	2	2	1	2	1.25	21.96	3	1	李永翔/张尚鑫	4	1	3	1	0	2	230	20	0	2	1	2	1	2	0	3	2	0	0	0	5
2019001489	18055153173	许秀林	2	1950-10-06	69	2019-01-04	2019-01-17	13	155	54	22.4766	4.5	2	2	1	2	1	1	1	2	1	1	2	0.2	6.66	1	1	李永翔/张尚鑫	4	1	3	1	0	3	300	50	0	2	1	2	1	2	1	5	2	0	0	0	5
2019511108	13855312212	谢晓华	2	1964-02-04	55	2019-05-04	2019-05-16	12	156	55	22.6003	5	4	2	3	2	1	1	4	2	2	1	2	0.45	3.76	2	1	李永翔/张尚鑫	4	1	3	1	0	3	280	20	0	2	1	2	1	2	1	5	2	0	0	0	5
17162634	18356670318	李士平	2	1953-02-24	66	2019-06-06	2019-06-21	15	158	60	24.0346	5	2	2	2	2	1	1	2	2	1	1	2	0.69	4.24	1	1	李永翔/张尚鑫	4	2	3	1	4	3	440	50	0	2	1	2	1	2	1	2	2	0	0	0	5
17175219	13865172172	丁腊梅	2	1954-01-09	65	2019-07-02	2019-07-15	13	154	42	17.7096	5	2	2	3	2	1	1	2	2	3	1	2	6.75	10.17	3	1	李永翔/张尚鑫	4	2	3	1	0	3	230	30	0	2	1	2	1	2	1	3	2	0	0	0	5
17182769	13349010981	左家分	2	1943-08-02	76	2019-07-18	2019-08-01	14	160	63	24.6094	6	2	2	2	2	1	2	2	2	1	1	2	2.3	17.65	2	1	李永翔/张尚鑫	4	2	3	1	0	3	280	20	0	2	1	2	1	2	1	2	2	0	0	0	5
17186331	15856393107	魏明兰	2	1937-06-29	82	2019-07-25	2019-08-06	12	143	43	21.0279	5	2	2	3	4	1	1	3	2	3	1	2	13.43	12.91	2	1	李永翔/张尚鑫	4	2	3	1	0	3	240	30	0	2	1	2	1	2	1	2	2	0	0	0	5
17189710	13856543479	李其花	2	1971-03-20	48	2019-08-03	2019-08-21	18	164	52	19.3337	5	2	2	2	2	1	1	3	2	3	1	2	11.93	14.27	2	1	李永翔/张尚鑫	4	2	3	1	4	3	150	20	0	2	1	2	1	2	0	6	2	0	0	0	5
17197407	18356082930	汪要娟	2	1964-11-10	55	2019-08-21	2019-09-06	16	158	61	24.4352	4	2	2	3	2	1	1	2	2	1	1	2	1.51	19.99	2	1	李永翔/张尚鑫	4	2	3	1	0	3	300	20	0	2	1	2	1	5	1	2	2	0	0	0	5
[truncated: 18 more columns]

## Sheet: Sheet2
Preoperative characteristics	R-TME	L-TME	Stats	P
Total patients	200	486
Sex(male,%)	121(60.5)	302(62.1)	0.161	0.688
Average age（mean,SD）	58.4±11.8	59.8±11.5	t=-1.487	0.137
Body mass index（mean,SD）	23.1±3.2	23.0±3.1	t=0.517	0.605
ASA classification
Ⅰ（%） Ⅱ（%） Ⅲ（%）	26(13)	52(10.7)	2.185	0.355
	134(67)	353(72.6)
	40(20)	81(16.7)
NRS2002 score(median,IQR)	2(2,3)	2(2,3)	Z=-0.828	0.408
Diabetes(yes,%)	26(13.1)	54(11.1)	0.491	0.484
Level of hemoglobin（g/L,mean,SD）	130.9±15.5	129.5±15.3	t=1.120	0.668
Level of plasma albumin(g/L,mean,SD)	43.2±7.1	42.7±3.6	t=1.393	0.258
Level of CEA(≥5ng/ml,%)	49(24.5)	154(31.7)	3.513	0.061
Level of CA199(≥36u/ml,%)	18(9)	58(11.9)	1.238	0.266
Distance from anal edge(cm,mean,SD)	5.06±0.84	5.66±0.53	t=-0.279	＜0.01
MRI cT stage,N(%)
T1(%) T2(%) T3(%) T4a(%)	26(13)	59(12.1)	0.608	0.738
	117(58.5)	274(56.4)
	57(28.5)	153(31.5)
MRI cN stage,N(%)
N0(%) N1(%) N2(%)	126(63)	336(69.1)	2.426	0.297
	43(21.5)	87(17.9)
	31(15.5)	63(13)
MRI cTNM stage,N(%)				0.464
Ⅰ(%)	99(49.5)	250(51.5)	1.537
Ⅱ(%)	39(19.5)	107(22)
Ⅲ(%)	62(31)	129(26.5)
Neoadjuvant Chemotherapy(%)	21(10.5)	43(8.8)	1.638	0.441
Neoadjuvant Chemotherapy and radiotherapy(%)	29(14.5)	57(11.7)
Surgical characteristics	R-TME	L-TME		P
Operative time(min,mean,SD)	249±64	203±47	t=9.098	＜0.001
Intraoperative blood loss, mean(SD), ml	82±49	95±33	t=-3.522	0.001
Blood transfusion (yes, %)	8(4)	18(3.7)
Conversion to laparotomy	0(0)	2(0.4)		0.953
Temporary ileostomy(yes,%)	129(64.5)	251(51.6)	9.474	0.002
Postoperative Recovery characteristics	R-TME	L-TME		P
The leaving bed time(days,median,IQR)	2(2,3)	3(2,3)	-6.264	＜0.001
Aerofluxus, Days, median(P25,P75,IQR)	2(1,3)	3(2,3)	-7.828	＜0.001
Time to liquid diet, Days, median(P25,P75,IQR)	3(2,4)	4(3,4)	-8.064	＜0.001
VAS score, median(P25,P75,IQR)
Day 1 Day 2 Day 3	2(1,2)	2(1,2)	-0.49	0.624
	1(1,2)	1(1,2)	-0.612	0.54
	1(1,1)	1(1,1)	-0.334	0.738
Removal time of catheter, Days, mean(SD)	4.9±1.2	5.2±1.3	-2.903	0.004
Volume of drainage, ml , mean(SD)	209±63	222±100	-1.783	0.083
Time of drainage cube, Days, mean(SD)	5.7±1.3	5.9±1.6	-1.38	0.168
Postoperative length of stay, Days, mean(SD)	9.5±4.6	11.3±5.9	-4.239	＜0.001
Total hospitalization costs(￥)， mean(SD)	53922±14290	48522±17466	4.206	＜0.001
Postoperative complication within 30days	R-TME	L-TME		P
Total,N(%)	32(16)	86(17.7)		0.593
Anastomotic leakage(%)	8(4)	24(4.9)		0.596
Anastomotic and abdominal bleeding(%)	2(1)	5(1)		0.973
Wound infection(%)	2(1)	4(0.8)		0.821
Abdominal infection(%)	1(0.5)	5(1)		0.499
Pulmonary infection(%)	3(1.5)	10(2.1)		0.626
Urinary infection	1(0.5)	5(1)		0.499
Urinary retention(%)	7(3.5)	16(3.3)		0.891
Ileus(%)	8(4)	16(3.3)		0.647
Clavien-Dindo classification
Ⅰ(%) Ⅱ(%) Ⅲ(%) Ⅳ(%) Ⅴ(%)	10(5)	24(4.9)		0.952
	18(9)	48(9.8)
	2(1)	10(2.1)
	1(0.5)	2(0.4)
	1(0.5)	2(0.4)
Postoperative pathological results	R-TME	L-TME		P
Tumor size, cm, mean(SD)	3.9±1.3	4.1±1.3	-0.932	0.352
Tumor differentiation, n(%)
Well differentiated adenocarcinoma Moderately differentiated adenocarcinoma Poorly differentiated adenocarcinoma Mucinous adenocarcinoma	10(5)	27(5.6)	3.517	0.319
	160(80)	361(74.3)
	18(9)	49(10.1)
	12(6)	49(10.1)
Number of Harvested lymph nodes, mean(SD)	13.6±3.7	14.0±3.7	-1.39	0.165
Number of positive lymph nodes, mean(SD)	1.2±2.7	1.6±3.1	-1.35	0.178
Vascular invasion, n(%)	118(59)	291(59.9)	0.045	0.832
Nerve invasion, n(%)	63(31.5)	126(25.9)	1.659	0.138
Tumor deposit,N(%)	55(27.5)	136(28)	0.016	0.898
Distal resection margin(cm, median,IQR)	1.4(1.1,1.9)	1.6(1,2)	-3.64	＜0.05
Positive Circumferential resection margin, n(%)	1(0.5)	3(0.6)		0.855
pT stage,N(%)
Tis T1 T2 T3 T4a T4b	6(3)	12(2.5)	2.935	0.569
	24(12)	49(10.1)
	58(29)	120(24.7)
	106(53)	292(60.1)
	6(3)	13(2.7)
pN stage,N(%)
N0 N1a N1b N1c N2a N2b	121(60.5)	277(57)	4.438	0.488
	21(10.5)	47(9.7)
	24(12)	58(11.9)
	13(6.5)	25(5.1)
	11(5.5)	35(7.2)
	10(5)	44(9.1)
pTNM stage,N(%)
Ⅰ	66(33)	132(27.2)	2.354	0.308
Ⅱ	57(28.5)	150(30.9)
Ⅲ	77(38.5)	204(42)
Postoperative adjuvant treatment And Follow-up outcomes	R-TME	L-TME		P
Time of stoma closure(month,mean,SD)	4.3±1.6	4.0±1.5		0.206
Adjuvant Chemotherapy,N(%)	150(75)	378(78.1)		0.44
Adjuvant Radiotherapy,N(%)	71(35.7)	127(26.7)		0.019
Total patients,N	199	484
The follow-up time(month,median)	52(11,78)	54(11,79)		0.238
Overall 3-year survival rate(%)	88.4	87.2		0.464
3-year recurrence-free survival rate(%)	84.9	83.4		0.631
The median survival time

## Sheet: Sheet3
IPSS score	Total, n	Pre-operation Median(IQR)	1 month Median(IQR)	3 month Median(IQR)	6 month Median(IQR)	12 month Median(IQR)	24 month Median(IQR)
R-TME	169	4(3~5)	7(6~9)	5(5~8)	5(4~6)	4(3~5)	4(3~5)
L-TME	404	4(3~6)	7(7~9.75)	7(6~8)	6(4~7)	4(3~6)	4(3~6)
Z value		-1.704	-1.834	-5.036	-3.903	-1.322	-1.326
P value		0.088	0.067	＜0.001	＜0.001	0.186	0.185
Wexner score	Total, n	Pre-operation Median(IQR)	Postoperative 6 month Median(IQR)	Postoperative 12 month Median(IQR)	Postoperative 24 month Median(IQR)
R-TME	169	0(0,0)	0(0,1)	0(0,1)	0(0,0)
L-TME	404	0(0,0)	1(1,3)	1(0,1)	0(0,0)
Z value		-0.144	-4.612	-4.35	-0.27
P value		0.885	＜0.001	＜0.001	0.787
IIEF Score	Total, n	Pre-operation Mean(SD)	Postoperative 3 month Mean(SD)	Postoperative 6 month Mean(SD)	Postoperative 12 month Mean(SD)	Postoperative 24 month Mean(SD)
R-TME	46	59.4±4.5	20.2±4.2	38.5±4.5	46.4±5.9	51.4±6.2
L-TME	75	59.1±4.9	19.1±4.1	34.5±5.8	41.0±5.6	50.5±5.8
t value		0.377	1.293	3.803	5.128	0.834
P value		0.707	0.199	＜0.001	＜0.001	0.406
FIFS Score	Total, n	Pre-operation Mean(SD)	Postoperative 3 month Mean(SD)	Postoperative 6 month Mean(SD)	Postoperative 12 month Mean(SD)	Postoperative 24 month Mean(SD)
R-TME	20	25.1±3.9	16.6±3.7	19.4±3.9	21.3±4.2	23.0±4.3
L-TME	55	24.5±3.1	14.2±2.5	16.1±2.7	19.0±3.1	22.1±3.7
t value		0.704	3.094	4.032	2.684	0.866
P value		0.484	0.003	＜0.001	＜0.001	0.389
Univariate Cox regression analysis of predictors of OS and DFS
Variables	Overall survival		Disease-free survival
	HR (95% CI)	P value	HR (95% CI)	P value
Surgical approach: robotic surgery vs laparoscopic surgery	1.09 (0.71-1.69)	0.692	0.97 (0.67-1.42)	0.886
Age ≥70 years	1.11 (0.74-1.67)	0.6	1.27 (0.89-1.82)	0.185
Gender: male vs female	1.41 (0.89-2.25)	0.144	1.30 (0.85-1.99)	0.219
Neoadjuvant chemoradiotherapy	1.54 (0.99-2.41)	0.057	1.67 (1.12-2.46)	0.013
Intraoperative transfusion	0.87 (0.46-1.66)	0.681	0.77 (0.44-1.36)	0.365
Anastomotic leakage	1.66 (0.76-3.61)	0.202	1.36 (0.63-2.91)	0.434
R1 resection	3.36 (0.46-24.78)	0.234	2.40 (0.33-17.63)	0.388
Positive CRM
T stage: pT1-3 vs pT4a	7.15 (4.08-12.54)	＜0.0001	5.57 (3.16-9.82)	＜0.001
N stage: pN0 vs pN+	2.39 (1.59-3.61)	＜0.0001	1.77 (1.16-2.71)	0.008
Postoperative adjuvant chemotherapy	0.81 (0.41-1.63)	0.56	0.76 (0.41-1.40)	0.376
Postoperative adjuvant radiotherapy	0.61 (0.40-0.91)	0.014	0.64 (0.45-0.93)	0.019
