# Supplementary material for: Analysis of bowel function, urogenital function, and long-term follow-up outcomes associated with robotic and laparoscopic sphincter-preserving surgical approaches to total mesorectal excision in low rectal cancer: a retrospective cohort study
Source: World J Surg Oncol. 2022 May 27;20:167. doi: 10.1186/s12957-022-02631-0 (PMC9137207; doi:10.1186/s12957-022-02631-0)
Supplement: Supplementary file 3 — Additional file 3. [file 12957_2022_2631_MOESM3_ESM.xlsx]

## Sheet: 工作表1
Name											Diabetes							Hb	Alb	CEA （ng/ml）	abnormal(1)	CA199	abnormal (1)											drainage tube（days）	volume of drainage（ml）
	Sex	admission date	Date of Discharge	Age	Age	Stay	Height（cm）	Weight (Kg)	BMI（kg/m2）	Total cost		nutrition risk screening(>OR<3)	ASA CLASSICATION（1~6分）	Distance from anal margin(cm)	MRI T Stage	N Stage	neoadjuvant chemotherapy							cTNM stage	Date of operation	operating time（min）	intraoperatve blood loss（mL）	conversion	TME	Preventive stoma	transfusion	liquid diet（days）	Aerofluxus, Days			Removal time of catheter, Days	VAS score			The leaving bed time	Complication	Type of complications	Clavien-Dindo classication	Tumor size	Tumor differentiation	Harvested lymph nodes	positive lymph nodes	number of lymph nodes	distal distance
	1male 2female	YYYYMMDD	YYYYMMDD		2，≥70 ，1，＜70						1，no 2，yes				1.T1 2.T2 3.T3 4.T3	0.未评估 1.N0 2.N1 3.N2	0，no； 1，yes							1. I 2. II 3. III				0，no 1，yes	1.yes 2.no	0.no 1.yes	1，yes；2，no						POD1	POD2	POD3		1.yes 2.no	0.no 1.Anastomotic leakage 2.Wound infection 3.Anastomotic bleeding 4.abdominal bleeding 5.Abdominal infection 6.Pulmonary infection 7.Urinary infection 8.chylous leakage 9.Ileus 10.Cardiovascular accident 11.cerebrovascular accident 12.DVT 13.uroschesis；14.else	1：I 2：II 3：III 4：IV 5：V		1.Well differentiated adenocarcinoma 2.Moderately differentiated adenocarcinoma 3.Poorly differentiated adenocarcinoma 4.Mucinous adenocarcinoma		0，N0；1，N+
张中其	1	2017-04-06	2017-04-25	53.074	1	13	168	72	25.5102	57970	1	2	2	4	3	2	0	139	40.9	2.56	0	6.47	0	3	2017-04-12	260	60	0	1	1	2	2	2	6	220	6	2	1	1	2	1	6	2	3.8	2	16	1	3	1.8
申白云	1	2015-05-28	2015-06-12	54.7041	1	10	173	70	23.3887	49599	1	1	1	5	2	1	1	127	44.7	3	0	14.55	0	1	2015-06-02	240	50	0	1	0	2	3	2	6	180	6	2	1	1	2	2	0	0	3.3	3	10	0	0	1
陈国芳	2	2017-03-30	2017-04-13	51.9616	1	7	155	51	21.2279	50557	1	2	2	5	2	1	1	131	42.8	3.39	0	12.81	0	1	2017-04-06	170	50	0	1	1	2	2	1	5	200	4	1	1	1	2	2	0	0	2.8	3	15	0	0	1
李其花	2	2017-08-03	2017-08-21	46.4055	1	10	159	52	20.5688	60505	1	2	3	5	3	3	0	122	44.8	11.93	1	14.27	0	3	2017-08-11	200	40	0	1	0	2	4	3	8	300	5	2	2	1	2	2	0	0	6.3	2	14	1	4	1.1
胡孝镒	1	2017-02-01	2017-02-14	68.1726	1	8	170	62	21.4533	53245	1	2	2	6	3	3	0	132	44	2.53	0	4.61	0	3	2017-02-06	180	100	0	1	0	2	8	6	7	300	7	3	1	1	4	2	0	0	5.3	2	21	1	12	2
姚新良	1	2018-03-07	2018-04-09	61.4301	1	25	170	65	22.4913	62342	2	2	2	6	3	1	0	145	47	3.25	0	16.33	0	2	2018-03-15	200	50	0	1	0	2	4	3	10	400	5	3	3	2	2	1	1	2	3.8	2	14	0	0	1.3
韩修学	1	2016-11-15	2016-11-26	58.7123	1	8	172	63	21.2953	50990	1	2	2	8	3	1	0	132	44.9	3.84	0	2.5	0	2	2016-11-18	170	40	0	1	0	2	3	2	5	200	3	1	1	1	2	2	0	0	5.3	4	14	0	0	1.4
张国友	1	2018-02-13	2018-02-28	63.8493	1	6	165	68	24.977	56438	1	2	2	5	3	1	1	125	40.3	14.33	1	28.96	0	2	2018-02-22	270	120	0	1	1	2	2	2	5	220	5	2	1	1	2	2	0	0	4.2	3	7	0	0	1.6
王平	1	2016-09-28	2016-10-21	50.6137	1	13	174	62	20.4783	54349	1	2	3	5	3	2	1	132	45.8	4.04	0	15.48	0	3	2016-10-08	270	50	0	1	1	2	3	3	6	100	8	2	1	1	2	1	13	1	4.8	2	18	1	1	1.1
游家才	1	2016-10-09	2016-10-19	68.4904	1	7	170	70	24.2215	58926	2	3	2	3.5	2	1	1	143	47	4.65	0	13.6	0	1	2016-10-12	285	200	0	1	1	2	2	1	4	100	4	2	2	1	2	2	0	0	2.3	1	9	0	0	1
王安平	1	2017-09-14	2017-09-28	58.3041	1	9	169	58	20.3074	47370	1	3	2	5	3	3	0	123	38.4	1.38	0	2.87	0	3	2017-09-19	180	50	0	1	1	2	2	2	5	180	4	2	2	1	3	2	0	0	4.8	4	19	0	0	1.4
程广侠	1	2016-05-10	2016-06-07	54.3863	1	19	150	50	22.2222	67799	1	2	2	5	2	2	0	144	48.8	3.17	0	16.48	0	2	2016-05-19	255	100	0	1	0	2	6	6	8	300	10	2	2	1	3	1	1	3	3.8	2	16	1	2	2
胡玉勤	1	2016-11-13	2016-11-23	60.1726	1	7	170	72	24.9135	70924	1	2	2	5	3	3	0	141	50.6	4.66	0	18.66	0	3	2016-11-16	280	50	0	1	1	2	3	2	4	150	4	2	1	1	2	2	0	0	6.3	2	16	0	0	1
许长英	2	2017-10-16	2017-11-01	63.8986	1	9	159	54	21.3599	47881	1	2	2	6	3	2	1	117	43.2	3.48	0	14.38	0	3	2017-10-23	150	20	0	1	0	2	4	3	6	220	4	2	1	1	3	2	0	0	4.3	3	12	1	5	2.3
仇志兰	2	2016-11-21	2016-12-04	47.326	1	10	162	62	23.6244	42318	1	2	2	3	1	1	0	145	39	3.05	0	13.83	0	1	2016-11-24	260	100	0	1	1	2	2	1	5	240	3	2	1	1	2	2	0	0	2.3	2	8	0	0	0.7
胡建生	1	2016-08-30	2016-09-17	68.2795	1	11	168	60	21.2585	48524	1	2	2	5	2	3	1	120	43.6	5.41	1	114.74	1	3	2016-09-06	250	100	0	1	1	2	3	2	7	150	6	3	2	2	3	2	0	0	4.1	2	19	1	12	1.9
许霭华	2	2017-09-01	2017-09-15	79.7205	2	8	149	43	19.3685	50777	1	4	3	5	1	1	1	120	39.5	0.79	0	5.01	0	1	2017-09-07	180	50	0	1	1	2	3	2	6	200	5	2	1	1	2	2	0	0	2.3	2	7	0	0	1.6
吴义禄	1	2017-04-16	2017-04-26	70.6603	2	6	170	65	22.4913	51802	1	2	2	5	3	1	0	171	47	5.77	1	9.87	0	2	2017-04-20	210	100	0	1	1	2	2	2	4	180	4	1	1	1	2	2	0	0	3.3	2	8	0	0	1.6
宣正炎	1	2015-10-05	2015-10-21	70.4685	2	8	168	78	27.6361	56026	2	4	2	5	2	1	0	105	35	3.43	0	12.7	0	1	2015-10-13	390	100	0	1	0	2	4	2	5	160	4	2	2	1	3	2	0	0	2.3	2	13	0	0	1
王伟琴	2	2015-07-05	2015-07-21	61.3178	1	11	155	51	21.2279	47821	1	2	1	5	2	1	1	123	41.3	0.67	0	21.23	0	1	2015-07-10	220	50	0	1	1	2	3	2	5	180	6	2	1	1	3	2	0	0	5.3	2	21	1	18	2
闫广兰	2	2015-04-09	2015-04-28	77.9918	2	12	158	70	28.0404	53061	2	5	3	4	1	1	0	121	37.1	5.39	1	10.42	0	1	2015-04-16	200	40	0	1	1	2	3	2	6	220	4	2	1	1	3	1	9	1	2.8	2	13	0	0	0.7
鲍金凤	2	2015-05-02	2015-05-21	46.2466	1	14	154	50	21.0828	58495	1	2	1	6	2	2	0	138	39.2	3.82	0	6.97	0	3	2015-05-07	300	80	0	1	0	2	3	2	9	260	6	2	2	1	3	1	9	1	2.3	4	12	1	2	2
孙亚伯	1	2016-02-05	2016-02-14	73.5836	2	7	175	77.5	25.3061	69208	1	3	3	4.5	2	1	0	150	47.3	19.72	1	130.59	1	1	2016-02-07	230	50	0	1	1	2	4	3	5	200	6	1	1	1	2	2	0	0	5.3	2	14	0	0	0.8
李春香	2	2015-06-08	2015-06-20	34.0219	1	9	163	70	26.3465	48255	1	1	1	5	2	1	1	126	43.8	1.86	0	17.49	0	1	2015-06-11	240	50	0	1	0	2	4	3	6	200	6	2	2	1	3	2	0	0	3.8	2	19	1	6	1.5
张东发	1	2015-12-26	2016-01-10	48.0877	1	8	167	64	22.9481	38178	2	3	3	4	2	3	0	138	39.2	3.12	0	8.92	0	3	2016-01-02	300	100	0	1	1	2	3	2	6	180	5	2	2	2	2	2	0	0	3.3	2	7	0	0	1
郑礼贤	1	2015-12-24	2016-01-11	70.6027	2	12	170	70	24.2215	48217	1	2	2	6	2	2	0	130	36.8	6.81	1	43.06	1	2	2015-12-30	270	100	0	1	0	2	5	3	7	200	7	2	2	1	3	2	0	0	3.3	3	12	1	11	2
吴娟香	2	2015-02-01	2015-02-16	57.2192	1	13	162	55	20.9572	95231	1	2	1	5	2	1	0	114	38.2	17.92	1	63.68	1	1	2015-02-03	320	150	0	1	1	2	4	3	9	500	5	2	2	2	3	1	9	2	1.3	2	12	1	4	2
赵元伦	1	2017-12-08	2017-12-22	82.1562	2	9	165	60	22.0386	51213	1	4	3	6	2	1	0	142	38	3.45	0	14.32	0	1	2017-12-13	180	50	0	1	0	2	3	2	5	150	5	3	2	2	2	2	0	0	3.3	2	13	0	0	2
毕得翠	2	2017-10-17	2017-10-31	58.8822	1	7	150	58	25.7778	49315	1	4	2	3.5	3	1	1	93	42.2	3.02	0	4.49	0	2	2017-10-24	180	40	0	1	1	2	2	1	4	180	4	1	1	1	1	2	0	0	4.3	2	11	0	0	0.8
陈传芳	2	2015-11-28	2015-12-11	69.8904	2	8	162	56	21.3382	43330	1	3	2	5	2	1	1	112	44.2	3.24	0	14.67	0	1	2015-12-03	260	50	0	1	1	2	2	1	6	220	4	2	1	1	2	2	0	0	5.8	2	17	1	1	1.3
王元兴	1	2016-09-21	2016-10-06	79.2274	2	10	178	68	21.4619	56652	1	4	3	6	2	1	1	126	39.1	5.53	1	21.8	0	1	2016-09-26	220	250	0	1	0	2	4	3	4	200	4	2	1	1	2	2	0	0	4.3	2	8	0	0	2
胡孔国	1	2017-10-16	2017-10-27	53.2137	1	8	168	63	22.3214	44053	1	2	2	6	3	2	0	140	46.7	2.47	0	34.97	0	3	2017-10-19	205	100	0	1	0	2	3	2	5	200	6	2	2	1	2	2	0	0	3.6	3	18	1	3	2
王家珍	2	2018-02-27	2018-03-13	73.3205	2	7	161	62	23.9188	41035	1	1	3	6	3	1	0	134	41.8	16.71	1	106.39	1	2	2018-03-06	200	50	0	1	0	2	3	2	5	180	5	1	1	1	2	2	0	0	5.3	3	17	1	1	1
王明荣	1	2016-07-16	2016-08-19	72.5616	2	23	175	77	25.1429	66254	2	4	2	4	2	3	0	105	41.4	4.87	0	14.23	0	3	2016-07-27	360	150	0	1	1	2	2	2	7	140	5	2	1	2	3	1	2	2	2.3	2	12	0	0	1.1
陈荣珍	2	2016-08-08	2016-08-27	50.1068	1	12	158	62	24.8358	52306	1	2	2	5	2	1	1	120	43.6	5.8	1	7.16	0	1	2016-08-15	240	50	0	1	1	2	3	2	5	200	7	1	1	1	2	2	0	0	4.3	2	13	0	0	1.8
费金香	2	2016-11-03	2016-11-17	57.1781	1	10	164	75	27.8852	50557	1	2	2	5	3	2	0	135	45.2	21.93	1	8.12	0	3	2016-11-07	210	50	0	1	1	2	5	3	8	230	5	2	1	1	3	2	0	0	4.3	2	13	1	4	1.1
项其爱	2	2016-07-25	2016-08-13	49.8384	1	11	162	51	19.433	52887	1	2	2	5	2	1	1	128	45.9	5.25	1	19.4	0	1	2016-08-02	180	30	0	1	0	2	6	4	7	220	6	2	1	1	3	2	0	0	3.8	2	10	0	0	1.5
张洁影	2	2015-06-18	2015-07-07	47.0027	1	12	160	71	27.7344	42165	1	1	1	5	2	1	1	126	43	41.64	1	16.83	0	1	2015-06-25	250	50	0	1	0	2	5	4	6	250	6	3	2	1	3	1	9	2	4.8	2	17	0	0	1.8
柴树修	1	2015-10-10	2015-10-20	75.8247	2	6	155	48	19.9792	43192	2	2	2	4	2	2	0	132	39.3	11.05	1	38.88	1	3	2015-10-14	255	100	0	1	0	2	4	3	6	160	5	2	2	1	2	2	0	0	2.6	2	8	1	2	1
朱方其	1	2017-11-29	2017-12-09	74.3753	2	7	172	55	18.5911	46084	1	2	2	4.5	2	1	0	128	41.2	5.35	1	7.52	0	1	2017-12-02	260	100	0	1	1	2	2	2	6	300	4	1	1	1	2	2	0	0	5.3	2	10	0	0	1
李家年	1	2017-04-15	2017-04-27	54.4082	1	7	160	64	25	40900	1	2	2	5	1	1	0	137	39.1	1.7	0	15.92	0	1	2017-04-20	150	100	0	1	1	2	2	1	4	160	4	1	1	1	2	2	0	0	4.8	1	14	0	0	1.2
袁双印	1	2017-10-20	2017-11-02	44.663	1	7	172	70	23.6614	51815	1	3	2	5	1	1	0	143	47	1.12	0	3.46	0	1	2017-10-26	180	50	0	1	1	2	2	1	5	180	4	2	1	1	2	2	0	0	2.3	1	15	0	0	1.4
左家分	2	2017-07-19	2017-08-01	74.0137	2	7	160	63	24.6094	43853	1	3	2	5	1	1	0	125	39.9	2.3	0	18.6	0	1	2017-07-25	280	50	0	1	1	2	2	1	5	160	4	1	1	1	2	2	0	0	1.3	1	14	0	0	1.5
李玲	2	2018-02-23	2018-03-07	54.5178	1	6	158	71	28.441	43405	1	2	2	6	1	1	0	143	42.4	2.38	0	10.45	0	1	2018-03-01	320	50	0	1	0	2	3	3	4	160	3	1	1	1	2	2	0	0	3.3	1	13	0	0	2
李士平	2	2016-06-06	2016-06-21	63.3233	1	9	158	60	24.0346	55797	1	2	2	5	1	1	0	126	40.5	0.69	0	4.24	0	1	2016-06-12	350	60	0	1	1	2	2	2	5	250	5	2	1	1	2	2	0	0	2.3	2	10	0	0	0.6
吴明政	1	2017-08-02	2017-08-14	43.8466	1	7	179	74	23.0954	45863	2	1	2	5	1	1	0	137	47.1	1.97	0	3.59	0	1	2017-08-07	255	100	0	1	1	2	2	1	5	180	5	1	1	1	2	2	0	0	1.3	4	10	0	0	0.8
陈庭梅	2	2016-11-28	2016-12-16	79.9452	2	10	160	45	17.5781	54599	1	4	2	6	1	1	0	108	35.2	1.99	0	44.9	1	1	2016-12-06	200	50	0	1	1	2	2	1	5	180	4	1	1	1	2	2	0	0	3.8	2	9	0	0	1
刘福陵	1	2016-01-25	2016-02-06	67.1096	1	9	171	65	22.2291	39366	2	2	2	5	1	1	0	122	41.4	1.91	0	13.65	0	1	2016-01-28	480	250	0	1	1	2	4	2	4	100	4	3	3	1	2	2	0	0	2.1	2	4	0	0	1.2
李世普	1	2016-12-05	2016-12-29	77.2329	2	19	170	53	18.3391	49452	1	2	3	4.5	2	1	0	152	39.6	3.23	0	5.24	0	1	2016-12-10	235	50	0	1	1	2	5	3	8	210	6	3	3	2	4	2	0	0	6.3	2	15	0	0	1.2
谢振彬	1	2016-11-03	2016-11-20	44.4986	1	12	176	75	24.2123	52034	1	2	2	6	1	1	0	161	51.7	3.48	0	7.31	0	1	2016-11-08	180	30	0	1	0	2	3	2	4	160	4	1	1	1	2	2	0	0	5.3	2	14	0	0	1.4
陈存菊	2	2017-06-14	2017-06-29	61.6384	1	8	158	50	20.0288	43134	1	2	2	5	1	1	0	130	42.7	3.45	0	12.55	0	1	2017-06-21	190	30	0	1	1	2	2	2	5	180	6	1	1	1	2	2	0	0	1.8	3	11	0	0	1.4
汤义侠	2	2016-12-11	2016-12-28	62.6055	1	7	160	55	21.4844	66000	1	2	2	5	1	1	0	134	44.3	1.34	0	17.6	0	1	2016-12-21	260	50	0	1	1	2	4	3	4	200	4	2	1	1	2	2	0	0	2.3	2	12	0	0	1.4
许秀林	2	2018-01-04	2018-01-17	67.3863	1	8	160	61	23.8281	44303	2	2	2	5	2	1	0	114	38.1	0.2	0	260	1	1	2018-01-09	300	100	0	1	1	2	3	2	5	160	4	2	1	1	2	2	0	0	5.3	2	13	0	0	1.4
王绍福	1	2016-08-07	2016-08-19	58.3315	1	8	166	70	25.4028	50908	1	2	2	4	1	1	0	144	40.5	1.7	0	29.76	0	1	2016-08-11	230	50	0	1	1	2	3	2	6	200	5	2	1	1	2	2	0	0	1.7	2	14	0	0	1.5
张建	1	2018-04-25	2018-05-06	60.3507	1	4	170	81	28.0277	46380	1	2	2	3.5	1	1	0	149	45.5	3.45	0	10.52	0	1	2018-05-02	295	120	0	1	1	2	2	2	5	160	5	1	1	1	2	2	0	0	3.3	2	21	0	0	1.5
张桂兰	2	2017-12-06	2017-12-19	59.7945	1	8	146	57	26.7405	47296	1	2	2	5.5	1	1	0	119	42.6	2.3	0	3.45	0	1	2017-12-11	260	30	0	1	0	2	3	3	5	140	4	2	1	1	2	2	0	0	3.3	2	12	0	0	2
沈乃荣	1	2016-04-10	2016-04-29	79.9205	2	14	159	55	21.7555	47854	2	4	3	6	2	1	0	139	42.7	0.74	0	9.93	0	1	2016-04-15	230	100	0	1	0	2	4	3	5	100	5	4	2	1	3	2	0	0	3.3	1	8	0	0	2
罗保荣	2	2017-03-17	2017-04-05	60.2192	1	8	157	57	23.1247	51689	1	2	3	4	1	2	0	122	48.3	1.86	0	35.74	1	2	2017-03-28	200	20	0	1	1	2	4	2	6	220	3	2	1	1	3	2	0	0	3.8	2	11	1	1	1.3
胡敬霞	2	2018-06-18	2018-07-01	49.9342	1	7	162	57	21.7193	41417	1	1	2	6	2	2	0	138	46.8	3.69	0	15.51	0	3	2018-06-24	185	20	0	1	0	2	2	2	5	180	4	2	1	1	1	2	0	0	2.8	2	10	1	1	1.8
蒋爱云	2	2018-01-26	2018-02-07	59.9644	1	7	168	72	25.5102	38786	1	2	2	4	1	2	0	135	39.9	2.98	0	4.36	0	2	2018-01-31	220	50	0	1	1	2	2	2	5	180	4	2	1	1	1	2	0	0	2.7	4	10	1	5	0.8
王彩花	2	2018-03-03	2018-03-15	65.2658	1	6	153	54	23.0681	54974	1	3	3	3.5	2	1	0	123	37.6	3.13	0	7.08	0	1	2018-03-09	195	50	0	1	1	2	2	1	5	200	6	2	1	1	2	2	0	0	5.8	2	12	0	0	0.1
张玉粉	2	2016-02-27	2016-03-08	62.2685	1	7	154	63	26.5643	58054	1	3	2	4.5	2	1	0	102	42.4	9.9	1	29.3	0	1	2016-03-01	390	100	0	1	1	2	2	2	5	220	5	2	1	1	2	2	0	0	4.3	2	14	0	0	0.3
赵其昌	1	2015-12-03	2015-12-16	71.1342	2	9	160	60	23.4375	62208	1	3	3	5	2	1	0	135	42.8	1.35	0	5.12	0	1	2015-12-07	380	120	0	1	1	2	2	2	6	300	4	1	1	1	2	2	0	0	3.3	2	13	0	0	0.3
蔡存芝	2	2015-08-29	2015-09-09	52.0466	1	9	150	47.5	21.1111	56647	1	2	2	4	2	3	0	120	39.9	2.38	0	4.17	0	3	2015-08-31	390	100	0	1	1	2	2	1	6	200	4	1	1	1	1	2	0	0	3.8	2	20	0	0	0.4
王秀英	2	2017-09-23	2017-10-02	64.5616	1	7	150	54	24	65698	1	2	2	5	1	1	0	116	43.3	2.2	0	9.95	0	1	2017-09-25	225	50	0	1	1	2	2	2	5	140	4	1	1	1	1	2	0	0	3.3	2	13	0	0	0.5
马多浩	1	2016-04-14	2016-04-26	67.9918	1	7	172	80	27.0416	79332	1	2	2	5	2	1	0	164	44.4	2.18	0	12.63	0	1	2016-04-19	220	50	0	1	1	2	3	2	5	220	5	2	2	1	2	2	0	0	6.3	2	13	0	0	0.5
杨义生	1	2016-11-19	2016-11-25	61.9726	1	7	172	75	25.3515	60825	1	2	2	3	2	1	0	145	37.2	26	1	6.83	0	1	2016-11-18	280	80	0	1	1	2	2	2	5	160	6	2	1	1	2	2	0	0	4.7	2	12	0	0	0.8
夏培然	1	2018-05-29	2018-06-28	73.9781	2	11	168	77	27.2817	70302	2	3	3	3	2	2	0	128	42.5	6.01	1	36.48	1	3	2018-06-17	400	150	0	1	1	2	2	1	5	180	7	2	2	1	2	2	0	0	4.3	2	10	0	0	0.8
卞新萍	2	2016-01-02	2016-01-12	41.9205	1	9	156	72	29.5858	39570	1	2	2	6	2	1	0	138	50.5	3.12	0	18.16	0	2	2016-01-03	210	50	0	1	1	2	3	2	5	250	5	3	2	1	3	2	0	0	4.3	2	6	0	0	1
董克英	2	2017-03-20	2017-04-05	70.1178	2	9	155	58	24.1415	51450	1	2	2	5	2	1	0	99	45	4.87	0	7.82	0	1	2017-03-27	180	20	0	1	0	2	4	3	5	200	3	2	2	1	2	2	0	0	4.3	2	13	0	0	1.1
陈主发	1	2017-11-11	2017-11-22	73.9589	2	6	176	67	21.6296	51015	1	5	3	5	2	1	0	94	36.7	3.1	0	10.94	0	1	2017-11-16	290	150	0	1	1	2	2	1	4	150	4	1	1	1	3	2	0	0	5.3	2	16	0	0	1.1
刘敏华	2	2017-12-17	2018-01-02	44.1096	1	8	162	62	23.6244	46463	1	2	2	4	2	1	0	119	44	1.91	0	22.93	0	1	2017-12-25	260	80	0	1	1	2	2	1	5	200	5	1	1	1	2	2	0	0	4.3	2	15	0	0	1.2
于中文	1	2016-10-10	2016-10-21	49.9973	1	8	172	70	23.6614	53603	2	3	2	4	2	1	0	153	44.2	50.17	1	250.08	1	1	2016-10-13	300	200	0	1	1	2	2	1	5	200	5	2	2	1	3	2	0	0	3.3	2	11	0	0	1.2
陈新杰	1	2015-11-03	2015-11-21	63.4301	1	12	175	72	23.5102	47214	1	1	1	5	2	1	0	146	42.5	1.62	0	10.79	0	1	2015-11-09	345	100	0	1	0	2	4	2	6	220	4	2	1	1	2	2	0	0	3.8	2	10	0	0	1.2
钱丽娟	2	2017-03-16	2017-03-26	35.2822	1	8	160	55	21.4844	52419	1	1	1	6	3	2	0	92	46.5	3.12	0	10.52	0	3	2017-03-18	220	100	0	1	0	2	3	2	6	250	4	1	1	1	2	2	0	0	4.1	2	19	0	0	1.3
朱仕银	1	2015-04-04	2015-04-15	48.3726	1	7	174	80	26.4236	37282	1	2	1	4.5	1	1	0	127	43.4	1.92	0	6.63	0	1	2015-04-08	320	100	0	1	1	2	2	2	6	200	6	1	1	1	2	2	0	0	2.3	2	14	0	0	1.3
汪宏兵	1	2016-10-16	2016-10-28	42.9918	1	6	170	63	21.7993	37941	1	1	2	5	2	1	0	144	44.8	1.42	0	6.15	0	1	2016-10-22	180	50	0	1	1	2	2	1	4	100	4	1	1	1	1	2	0	0	4.3	4	13	0	0	1.4
汤新备	1	2016-11-03	2016-11-20	61.8822	1	9	178	85	26.8274	57107	2	2	2	6	2	1	0	145	47.4	5.2	1	7.26	0	1	2016-11-11	240	50	0	1	1	2	2	1	5	200	5	1	1	1	2	2	0	0	3.8	2	8	0	0	1.4
谈正国	1	2017-04-07	2017-04-21	70.6137	2	8	170	58	20.0692	62463	1	3	3	5	2	1	0	120	33.5	2.32	0	20.61	0	1	2017-04-13	210	250	0	1	1	2	3	3	6	240	6	2	2	1	3	2	0	0	2.3	2	14	0	0	1.5
陈可方	1	2016-05-09	2016-05-16	48.8712	1	6	170	70	24.2215	69899	1	2	2	5.5	2	3	0	157	44.1	2.39	0	6.04	0	3	2016-05-10	265	100	0	1	1	2	2	2	5	250	4	1	1	1	1	2	0	0	3.8	2	12	0	0	1.6
班胜琴	2	2017-02-26	2017-03-08	67.6932	1	7	154	61	25.721	64560	1	3	3	5	2	1	0	128	44.4	0.98	0	8.56	0	1	2017-03-01	265	20	0	1	1	2	2	2	5	200	5	1	1	1	1	2	0	0	4.9	4	20	0	0	1.8
张守华	2	2016-03-14	2016-03-28	51.6658	1	11	158	62	24.8358	42377	2	2	2	4	2	1	0	130	45.1	1.47	0	10.49	0	1	2016-03-17	180	40	0	1	0	2	3	2	5	180	5	2	1	1	2	2	0	0	4.3	2	11	0	0	2
陶余庭	1	2018-03-22	2018-04-03	55.6247	1	8	170	65	22.4913	38083	1	2	2	6	2	1	0	128	41.4	1.26	0	23	0	1	2018-03-26	145	30	0	1	0	2	3	2	6	200	3	2	1	1	2	2	0	0	4.1	1	18	0	0	2
李永久	1	2015-02-04	2015-02-17	61.6822	1	8	160	54	21.0938	35678	1	3	1	6	2	1	0	132	41.8	3.54	0	14.45	0	1	2015-02-09	240	100	0	1	0	2	4	3	4	200	4	2	1	1	3	2	0	0	4.3	2	13	0	0	2.1
宋贤柱	1	2015-01-21	2015-02-05	70.0849	2	9	168	55	19.487	42137	1	4	1	4	2	1	0	75	43.3	1.95	0	3.57	0	1	2015-01-27	300	200	0	1	1	2	2	2	5	150	5	3	2	1	2	2	0	0	5.3	2	12	0	0	2.1
林敏	2	2016-09-07	2016-09-20	52.2932	1	8	170	51	17.6471	43114	1	2	2	6	2	1	0	133	41.6	1.41	0	18.89	0	1	2016-09-12	150	60	0	1	0	2	4	3	6	180	3	1	1	1	3	2	0	0	2.3	3	10	0	0	2.3
吴瑞林	1	2016-04-22	2016-05-02	63.6411	1	4	170	57	19.7232	37902	1	3	2	6	2	1	0	130	42.5	6.67	1	2.56	0	1	2016-04-28	180	50	0	1	0	2	3	2	5	100	5	3	1	1	2	2	0	0	7.3	3	20	0	0	2.5
王本和	1	2015-02-01	2015-02-17	60.3945	1	14	171	54	18.4672	41543	1	2	1	6	1	1	0	141	44.2	6.54	1	27.74	0	1	2015-02-03	195	100	0	1	0	2	3	2	9	300	4	2	2	1	2	2	0	0	3.3	2	13	1	1	2.5
赵陈氏	2	2016-09-25	2016-10-07	63.6055	1	8	141	53.5	26.9101	43153	1	2	2	4	2	2	0	118	38.9	1.28	0	5.51	0	3	2016-09-29	350	100	0	1	1	2	3	2	5	160	4	2	1	1	2	2	0	0	4.3	2	10	1	2	1.2
王前付	1	2016-07-25	2016-08-02	50.537	1	6	162	71	27.0538	47761	1	1	2	5	2	1	0	147	44.4	2.85	0	10.93	0	1	2016-07-27	210	50	0	1	1	2	4	3	4	150	4	1	1	1	3	2	0	0	3.8	2	14	1	2	1.4
项以和	1	2017-04-20	2017-05-04	80.1096	2	7	170	53	18.3391	45993	1	2	2	5	2	2	0	132	40.5	2.01	0	15.79	0	3	2017-04-27	220	100	0	1	1	2	3	2	5	200	4	1	1	1	2	2	0	0	2.8	2	10	1	2	1.4
祁学美	2	2017-03-19	2017-03-29	67.7452	1	7	160	55	21.4844	68262	1	2	2	4	2	2	0	113	45	1.6	0	18.7	0	2	2017-03-22	300	100	0	1	1	2	1	1	5	200	5	2	1	1	2	2	0	0	5.3	2	15	1	3	0.5
卓林珍	2	2016-01-23	2016-02-04	63.8822	1	7	163	60	22.5827	69188	1	2	2	5	2	2	0	116	43.6	1.84	0	20.82	0	2	2016-01-28	350	100	0	1	1	2	2	1	4	120	4	1	1	1	1	2	0	0	4.3	4	15	1	3	1.6
张吉萍	2	2016-12-07	2016-12-20	55.9616	1	9	165	65	23.8751	46014	1	2	2	6	2	2	0	123	45	1.25	0	21.96	0	3	2016-12-11	230	50	0	1	0	2	5	3	6	220	6	2	2	1	3	2	0	0	2.5	2	15	1	4	1.8
范江红	1	2017-07-09	2017-07-19	44.7753	1	9	165	82	30.1194	58412	1	1	2	4	2	1	0	154	43.4	1.07	0	6.94	0	1	2017-07-10	220	50	0	1	1	2	2	1	6	200	4	2	1	1	2	2	0	0	4.8	2	15	0	0	0.5
张多伍	1	2017-02-13	2017-03-02	39.0849	1	10	173	61	20.3816	54029	1	2	2	3	3	1	0	152	48.3	5.3	1	9.79	0	2	2017-02-20	240	80	0	1	1	2	2	2	6	200	6	2	1	1	2	2	0	0	2.3	2	22	0	0	0.8
汪国珍	2	2016-10-13	2016-10-26	69.5644	2	7	155	46	19.1467	49072	1	4	3	4	3	1	0	105	41.2	6.31	1	17.9	0	2	2016-10-19	205	100	0	1	1	2	2	1	5	150	7	3	2	2	3	2	0	0	4.8	2	9	0	0	0.9
郑景全	1	2016-11-05	2016-11-16	45.2493	1	9	167	67	24.0238	51188	1	2	2	6	2	1	0	144	38.3	0.93	0	8.1	0	1	2016-11-07	200	50	0	1	0	2	2	2	7	220	6	2	2	1	2	2	0	0	3.8	2	11	0	0	1
姚香枝	2	2016-09-08	2016-09-21	52.0329	1	7	155	42	17.4818	48301	1	2	2	5.5	2	1	0	126	40.2	3.39	0	7.95	0	1	2016-09-14	160	50	0	1	0	2	3	2	4	150	4	2	1	1	3	2	0	0	5.3	2	11	0	0	1
丁毛娥	2	2015-02-28	2015-03-13	63.811	1	8	155	55	22.8928	60521	1	2	1	5	2	1	0	128	47.9	4.85	0	10.63	0	1	2015-03-05	200	50	0	1	1	2	3	2	6	200	5	2	1	1	2	2	0	0	4.1	2	17	0	0	1
何世华	1	2018-03-06	2018-03-21	50.1753	1	8	165	64	23.5078	50551	1	2	2	5	3	1	0	134	45.7	1.35	0	5.4	0	2	2018-03-13	280	100	0	1	1	2	3	1	6	230	4	2	1	1	3	2	0	0	5.3	2	15	0	0	1.1
魏明兰	2	2015-07-25	2015-08-06	78.1233	2	7	150	42	18.6667	42668	1	3	3	5	2	2	0	114	39.4	13.43	1	12.91	0	3	2015-07-30	240	100	0	1	1	2	3	2	5	150	5	1	1	1	3	2	0	0	5.3	4	14	0	0	1.1
李新	1	2016-06-30	2016-07-15	49.3123	1	10	178	88	27.7743	44878	1	2	2	4	2	1	0	130	38.3	2.02	0	5.12	0	1	2016-07-05	250	50	0	1	1	2	2	2	6	180	6	2	1	1	2	2	0	0	4.8	2	12	0	0	1.2
李郑霞	2	2017-02-11	2017-02-23	50.0219	1	9	165	68	24.977	53199	1	2	2	5	3	2	0	119	43.3	1.43	0	6.04	0	3	2017-02-14	210	20	0	1	1	2	2	2	7	300	6	2	2	1	3	2	0	0	4.3	2	14	0	0	1.3
吴小妹	2	2015-04-15	2015-04-29	57.5562	1	8	160	54	21.0938	50226	1	1	1	4	2	1	0	116	36.9	1.15	0	22.61	0	1	2015-04-21	190	40	0	1	0	2	4	3	8	230	5	2	2	1	2	2	0	0	6.3	2	11	0	0	1.3
宋华伦	1	2016-06-25	2016-07-11	61.9096	1	11	176	67	21.6296	43596	1	2	2	6	2	1	0	131	44.2	6.29	1	14.7	0	1	2016-06-30	170	50	0	1	0	2	3	2	7	200	5	2	1	1	2	2	0	0	7.3	2	19	0	0	1.3
丁祖新	1	2015-11-23	2015-12-08	63.5562	1	12	170	73	25.2595	38436	1	2	2	6	2	1	0	111	35	3.24	0	4.25	0	1	2015-11-26	230	100	0	1	0	2	6	4	4	150	4	2	1	1	2	2	0	0	7.3	2	14	0	0	1.3
孔令凤	2	2016-09-09	2016-09-20	54.5288	1	6	165	65	23.8751	48399	2	2	2	6	2	1	0	122	39	2.04	0	7.22	0	1	2016-09-14	300	100	0	1	1	2	2	2	5	200	5	3	2	2	2	2	0	0	5.8	4	15	0	0	1.4
高峰	1	2017-12-13	2017-12-26	51.5452	1	9	170	55	19.0311	44357	1	2	2	4	3	1	0	133	47.1	2.79	0	4.82	0	2	2017-12-17	280	100	0	1	1	2	3	2	5	200	4	1	1	1	2	2	0	0	4.8	1	12	0	0	1.5
李庆芹	2	2018-05-15	2018-05-25	54.5699	1	7	166	61	22.1367	43753	1	2	2	5	2	1	0	140	42.8	0.95	0	6.62	0	1	2018-05-18	180	40	0	1	1	2	2	1	6	220	4	1	1	1	1	2	0	0	5.3	2	18	0	0	1.5
张天山	1	2016-10-25	2016-11-07	62.3151	1	8	173	74	24.7252	39433	1	3	2	5	2	1	0	139	46.2	4.15	0	15.16	0	1	2016-10-30	290	120	0	1	1	2	3	2	4	150	4	1	1	1	2	2	0	0	3.3	2	13	0	0	1.5
韩仁海	2	2015-06-27	2015-07-08	65.6082	1	9	150	71	31.5556	52124	2	3	3	6	2	1	0	129	44.3	12.29	1	1.41	0	1	2015-06-29	275	50	0	1	1	2	2	1	8	200	4	2	1	1	2	2	0	0	4.3	2	20	0	0	1.5
张德秀	2	2017-07-20	2017-08-02	68.9616	1	9	156	51.5	21.1621	40997	1	2	2	4	3	1	0	118	42.3	2.51	0	3.12	0	2	2017-07-24	180	50	0	1	1	2	2	2	7	200	6	2	1	1	1	2	0	0	4.3	2	15	0	0	1.5
廖国林	1	2017-04-11	2017-04-25	53.3014	1	7	172	70	23.6614	56599	1	2	2	5	3	1	0	151	47.4	3.64	0	7.13	0	2	2017-04-18	150	50	0	1	1	2	2	2	5	180	5	2	2	1	2	2	0	0	3.3	2	13	0	0	1.6
谢晓华	2	2017-05-04	2017-05-16	53.2822	1	7	156	55	22.6003	46275	1	2	2	5	3	1	0	120	41.7	0.45	0	3.76	0	2	2017-05-09	280	50	0	1	1	2	2	2	5	200	5	1	1	1	1	2	0	0	2.8	2	16	0	0	1.8
朱家宝	1	2016-02-18	2016-03-08	29.9425	1	32	175	64	20.898	43245	1	1	1	6	2	1	0	157	48	3.06	0	111.55	1	1	2016-02-05	225	200	0	1	1	2	4	2	4	200	4	3	2	2	2	2	0	0	5.3	2	18	0	0	2
孙金花	2	2016-05-09	2016-05-24	33.1534	1	8	158	49	19.6283	39025	1	2	2	5	2	1	0	135	47.4	1.16	0	32.41	0	1	2016-05-16	180	30	0	1	0	2	3	2	5	180	3	1	1	1	2	2	0	0	5.1	2	13	0	0	2
石玉贵	1	2016-06-11	2016-06-23	50.6877	1	8	175	59	19.2653	62936	1	2	2	6	2	1	0	143	45.2	1.44	0	22.71	0	1	2016-06-15	210	40	0	1	1	2	2	1	7	300	6	1	1	1	2	2	0	0	7.3	2	22	0	0	2
王世明	1	2016-01-31	2016-02-10	60.3096	1	8	173	74	24.7252	47287	1	1	2	6	2	1	0	133	48.7	2.79	0	14.26	0	1	2016-02-02	330	80	0	1	1	2	2	1	6	180	5	2	2	1	2	2	0	0	4.5	2	16	0	0	2
李祥艮	1	2016-09-18	2016-09-30	61.6521	1	8	166	70	25.4028	53108	1	2	2	6	2	1	0	128	44	1.55	0	3.56	0	1	2016-09-22	440	300	0	1	0	1	3	2	4	100	3	4	2	2	2	2	0	0	4.3	2	13	0	0	2
刘小连	2	2017-06-18	2017-07-04	65.189	1	12	160	51	19.9219	57384	1	2	2	6	2	2	0	127	43	4.32	0	32.69	0	2	2017-06-22	260	50	0	1	0	2	4	3	8	350	5	2	2	2	3	2	0	0	3.8	2	16	0	0	2
汤桂姐	2	2016-05-06	2016-05-21	65.526	1	9	161	60	23.1473	45397	1	1	2	6	2	1	0	119	42.4	0.36	0	15.22	0	1	2016-05-12	240	50	0	1	0	1	4	3	5	220	6	2	1	1	2	2	0	0	3.8	2	11	0	0	2
韩德玉	2	2017-10-25	2017-11-07	67.4795	1	8	155	57	23.7253	44993	1	2	2	6	3	1	0	119	42.8	1.07	0	6.85	0	2	2017-10-30	120	40	0	1	0	2	3	3	5	180	4	2	1	1	2	2	0	0	3.1	2	12	0	0	2
李跃树	1	2017-02-25	2017-03-10	74.9096	2	9	175	57	18.6122	48427	1	3	3	6	3	1	0	122	43.2	5.96	1	18.07	0	2	2017-03-01	180	30	0	1	0	2	4	3	6	180	4	2	2	1	3	2	0	0	4.3	2	11	0	0	2
郑家辉	1	2017-09-25	2017-10-08	62.9616	1	9	170	51	17.6471	44106	1	2	2	6	3	1	0	139	40.9	1.94	0	10.63	0	2	2017-09-29	300	50	0	1	1	2	2	1	7	220	3	1	1	1	2	2	0	0	5.3	2	16	0	0	2.1
叶勤会	2	2015-04-24	2015-05-07	81.389	2	7	150	41	18.2222	49195	1	4	3	6	2	1	0	114	45.9	25.26	1	31.68	0	1	2015-04-30	140	20	0	1	0	2	3	2	5	220	4	2	1	1	3	2	0	0	6.3	2	18	0	0	2.1
董光峰	1	2017-12-01	2017-12-16	61.4932	1	10	178	90	28.4055	51577	1	1	2	6	3	1	0	158	44.4	0.79	0	47.57	1	2	2017-12-06	300	120	0	1	0	1	4	3	6	240	4	2	1	1	3	2	0	0	4.3	2	20	0	0	2.5
王小流	1	2017-07-18	2017-07-31	48.6877	1	7	174	64	21.1389	50470	1	1	2	5	3	2	0	134	40.5	4.48	0	9.18	0	3	2017-07-24	280	120	0	1	1	2	2	2	5	200	5	2	1	1	2	2	0	0	3.8	2	18	1	1	1.1
蔡宝兰	2	2015-12-04	2015-12-20	53.5836	1	11	158	70	28.0404	51839	1	2	2	5	2	1	0	147	48.4	2.53	0	5.29	0	1	2015-12-09	250	80	0	1	0	2	4	3	5	180	5	2	1	1	2	2	0	0	2.3	2	11	1	1	1.3
刘小梅	2	2015-10-16	2015-10-28	42.0082	1	9	157	53	21.5019	65202	1	1	1	5	2	3	0	126	44.1	1.11	0	10.75	0	3	2015-10-19	250	30	0	1	0	2	2	2	6	250	4	2	1	1	2	2	0	0	3.8	2	12	1	1	1.8
陈传芳	2	2016-11-28	2016-12-11	70.8932	2	8	159	56	22.151	43330	1	2	2	5	3	1	0	112	44.2	3.4	0	14.67	0	2	2016-12-03	260	50	0	1	1	2	2	2	6	200	4	2	1	1	3	2	0	0	5.8	2	17	1	1	2
胡学灿	1	2016-12-17	2017-01-06	73.1699	2	9	172	73	24.6755	71562	1	3	3	6	2	1	0	142	45.5	46.63	1	59.42	1	1	2016-12-28	250	50	0	1	0	2	5	3	7	350	5	2	2	2	3	2	0	0	6.3	2	17	1	2	0.5
李于杰	1	2016-10-20	2016-11-10	84.1589	2	9	178	70	22.0932	65883	1	3	3	5	3	2	0	114	42.7	19.02	1	23.61	0	3	2016-11-01	210	80	0	1	1	2	2	2	6	190	5	2	1	1	2	2	0	0	2.8	2	10	1	2	1
付自强	1	2017-06-27	2017-07-12	80.6685	2	8	166	58	21.048	55602	1	4	3	5	3	1	0	145	38.9	24.25	1	3.19	0	2	2017-07-04	180	50	0	1	1	2	3	2	5	180	5	1	1	1	2	2	0	0	3.3	2	8	1	2	1.1
吴小琼	2	2017-10-18	2017-11-02	30.1726	1	10	163	50	18.8189	40700	1	1	1	4	2	1	0	118	46.9	2.43	0	4.56	0	1	2017-10-23	210	60	0	1	1	2	2	1	5	160	5	2	3	1	2	2	0	0	3.3	3	13	1	2	1.2
胡德玉	1	2018-02-17	2018-03-04	68.0055	1	10	165	61	22.4059	69772	1	3	3	5	2	2	0	145	47	1.32	0	11.21	0	2	2018-02-22	215	100	0	1	0	2	3	3	8	300	4	2	2	1	2	2	0	0	2.9	2	13	1	2	1.2
邓艳萍	2	2018-03-08	2018-03-16	50.9397	1	5	163	54	20.3244	63122	1	1	1	4	2	3	0	117	47.8	2.34	0	10.23	0	3	2018-03-11	190	30	0	1	1	2	2	1	4	200	4	2	1	1	2	2	0	0	3.3	2	16	1	2	1.5
孔德平	1	2016-08-06	2016-08-27	66.211	1	15	172	70	23.6614	53514	1	2	2	6	1	1	0	142	42.4	2.65	0	2.65	0	1	2016-08-12	210	50	0	1	0	2	5	3	6	300	5	3	2	1	3	2	0	0	3.3	2	12	1	2	1.5
胡起英	2	2017-03-07	2017-03-16	69.537	2	8	159	55	21.7555	66480	1	3	3	6	3	2	0	99	38.5	3.23	0	10.34	0	3	2017-03-08	210	20	0	1	0	2	4	3	7	300	6	1	1	1	3	2	0	0	4.1	2	12	1	2	1.5
孙本莲	2	2015-09-05	2015-09-18	62.9178	1	7	160	65	25.3906	54589	1	2	2	5	2	2	0	105	40.8	1.53	0	26	0	2	2015-09-11	270	50	0	1	1	2	2	1	5	80	5	2	1	1	2	2	0	0	5.3	2	14	1	2	2
崔兴华	2	2017-10-13	2017-10-26	61.3945	1	8	162	61	23.2434	44321	1	2	2	5	2	1	0	125	40.3	2.3	0	14.22	0	1	2017-10-18	240	80	0	1	1	2	2	1	5	160	5	2	1	1	2	2	0	0	3.3	2	13	1	3	1.8
聂忠华	1	2017-05-18	2017-06-01	44.6521	1	9	171	67	22.913	43305	1	1	2	5	3	2	0	144	48.1	8.05	1	14.16	0	3	2017-05-23	150	50	0	1	0	2	4	3	6	240	5	2	2	1	3	2	0	0	2.3	1	12	1	4	1.6
樊传洋	1	2015-05-13	2015-05-27	58.863	1	9	160	49	19.1406	53120	1	2	1	5	2	2	0	137	35.5	63.1	1	21.58	0	3	2015-05-18	180	50	0	1	0	2	4	3	6	180	7	2	2	1	2	2	0	0	3.3	2	15	1	7	1.1
吴桂兰	2	2016-03-27	2016-04-10	64.1644	1	9	140	40	20.4082	47954	1	3	2	6	2	1	0	126	44.8	30.22	1	54.51	1	1	2016-04-01	200	50	0	1	0	2	3	3	7	300	6	2	1	1	2	2	0	0	4.1	2	13	1	8	1.5
冯秀英	2	2017-07-09	2017-07-23	63.4521	1	10	155	70	29.1363	49890	1	2	2	6	3	1	0	124	42.9	4.46	0	9.11	0	2	2017-07-13	240	100	0	1	0	2	4	3	8	240	5	2	2	1	2	2	0	0	3.8	2	30	1	17	1
李树敏	1	2016-09-25	2016-10-08	64.8329	1	9	176	69	22.2753	54450	1	3	2	6	2	1	1	131	41	51.97	1	7.09	0	1	2016-09-29	210	200	0	1	0	2	4	3	4	200	3	3	3	2	2	2	0	0	3.3	2	13	0	0	2
张吉平	2	2017-12-07	2017-12-20	56.9616	1	9	165	65	23.8751	46014	1	2	2	6	2	3	1	123	45	2.5	0	6.34	0	3	2017-12-11	230	100	0	1	0	2	3	2	5	200	5	2	1	1	2	2	0	0	2.5	2	15	1	4	2.1
郑章宝	1	2015-05-05	2015-05-16	48.2986	1	8	173	61	20.3816	73696	1	2	1	4	2	2	1	135	45.5	4.61	0	23.94	0	3	2015-05-08	250	20	0	1	1	2	5	4	6	300	6	2	2	2	2	2	0	0	5.3	2	18	0	0	1
段子亮	1	2017-06-12	2017-06-24	48.1671	1	8	171	63	21.5451	42761	1	2	3	6	3	1	1	132	38.6	39.29	1	4.89	0	2	2017-06-16	140	20	0	1	0	2	4	3	5	220	4	1	1	1	2	2	0	0	2.3	2	12	0	0	2.1
储成方	1	2016-03-06	2016-03-14	49.4904	1	6	172	63	21.2953	66234	1	2	2	4	2	2	1	169	47.2	1.72	0	14.32	0	3	2016-03-08	210	40	0	1	1	2	2	1	4	190	4	1	1	1	1	2	0	0	4.6	2	12	1	1	0.4
陈红仙	2	2015-11-24	2015-12-10	41.8027	1	10	160	58	22.6562	54102	1	2	2	4	2	3	1	119	43.4	17.8	1	2.6	0	3	2015-11-30	300	120	0	1	0	2	4	3	6	160	3	2	1	1	3	2	0	0	5.8	2	10	1	1	1.2
王立岚	1	2017-03-14	2017-03-26	42.5699	1	9	174	68	22.46	49189	1	1	1	4	3	2	1	141	42.6	5.08	1	10.9	0	3	2017-03-17	240	80	0	1	1	2	3	1	5	250	5	1	1	1	2	2	0	0	3.8	2	17	1	1	1.5
王家桂	2	2016-06-28	2016-07-13	57.0192	1	7	160	53	20.7031	52232	1	2	2	5	2	2	1	134	45.2	17.68	1	8.67	0	2	2016-07-06	235	100	0	1	1	2	6	4	9	350	5	1	1	1	2	2	0	0	4.8	2	19	1	2	0.5
景浩洲	1	2015-08-14	2015-08-26	59.5644	1	0	175	80	26.1224	39812	2	2	1	6	2	1	1	132	40.8	2.28	0	10.7	0	2	2015-08-26	325	150	0	1	0	2	4	3	5	200	5	3	1	1	3	2	0	0	2.8	2	15	1	2	2
张奎	1	2018-02-05	2018-02-19	35.1726	1	12	173	62	20.7157	40399	1	2	2	6	3	2	1	141	45.3	0.46	0	4.1	0	3	2018-02-07	200	100	0	1	0	2	2	2	5	200	4	3	2	1	2	2	0	0	5.3	2	28	1	4	2
吴玉会	2	2016-02-04	2016-02-20	58.5397	1	4	159	55	21.7555	51497	1	1	1	6	2	2	1	136	41.9	3.94	0	0.5	0	3	2016-02-16	270	50	0	1	1	2	3	2	4	160	4	2	2	1	2	2	0	0	6.3	3	15	1	11	2.2
夏宏发	1	2017-09-20	2017-10-10	62.9452	1	12	178	65	20.5151	130284	1	2	3	5	3	1	1	133	43.9	4.7	0	26.42	0	2	2017-09-28	420	200	0	1	1	1	2	1	4	150	4	1	1	1	1	2	0	0	3.3	2	10	0	0	1.5
吴廷友	1	2015-08-05	2015-08-20	65.137	1	6	165	60	22.0386	49034	1	2	1	6	2	3	1	145	40.3	3.59	0	20.47	0	3	2015-08-14	265	50	0	1	1	2	3	2	5	140	6	2	1	1	2	2	0	0	1.8	2	9	0	0	1.5
汪要娟	2	2015-08-21	2015-09-06	50.8932	1	9	158	61	24.4352	45156	1	1	2	3	2	3	1	106	43.6	1.51	0	19.9	0	3	2015-08-28	295	100	0	1	1	1	2	1	4	200	4	1	1	1	2	2	0	0	1.3	2	17	1	1	1
刘炳付	1	2016-07-17	2016-07-27	33.9945	1	7	170	64	22.1453	51640	1	3	2	4.5	2	3	1	118	44	14.85	1	50.54	1	3	2016-07-20	450	200	0	1	1	2	2	1	6	200	5	1	1	1	2	2	0	0	3.3	2	7	0	0	0.4
费维柱	1	2016-11-04	2016-11-21	45.4247	1	7	174	72	23.7812	51377	1	2	2	4.5	3	3	1	118	41.1	1.68	0	7.01	0	3	2016-11-14	240	50	0	1	1	2	1	1	6	250	6	2	1	1	2	2	0	0	2.8	4	9	0	0	0.5
孔玲	1	2018-06-12	2018-06-23	67.2027	1	8	162	64	24.3865	57368	1	3	3	3.5	3	2	1	151	43	1.82	0	7.67	0	3	2018-06-15	300	120	0	1	1	2	2	1	6	200	5	2	1	1	2	2	0	0	0.7	2	13	0	0	1
柴助学	1	2018-03-27	2018-04-09	53.7808	1	7	165	53	19.4674	48509	1	1	2	4	2	3	1	145	43.8	2.08	0	6.38	0	3	2018-04-02	200	50	0	1	1	2	2	1	5	180	4	1	1	1	2	2	0	0	4.8	2	19	0	0	1.4
谢四平	1	2017-07-26	2017-08-09	50.5123	1	7	165	67	24.6097	45332	1	2	2	4.5	3	3	1	133	42.9	3.94	0	26.03	0	3	2017-08-02	320	100	0	1	1	2	2	1	5	220	5	1	1	1	2	2	0	0	2.3	2	17	1	1	1.4
陶满胜	1	2017-05-20	2017-05-30	36.0712	1	8	170	65	22.4913	46104	1	2	2	5	3	3	1	153	43.9	1.72	0	6.05	0	3	2017-05-22	315	100	0	1	1	2	2	1	6	280	5	1	1	1	1	2	0	0	3.8	2	12	0	0	0.8
林辉	1	2017-02-20	2017-02-28	28.3753	1	6	172	97	32.788	67902	1	2	2	4	3	3	1	152	42.3	1.8	0	6.02	0	3	2017-02-22	250	100	0	1	1	2	2	1	4	150	4	1	1	1	1	2	0	0	3.3	2	18	0	0	1.3
李道军	1	2016-11-26	2016-12-09	32.8904	1	9	175	73	23.8367	77440	1	2	2	4	3	3	1	126	40.5	4.48	0	4.25	0	3	2016-11-30	400	100	0	1	1	2	2	2	6	250	6	2	1	1	2	2	0	0	3.3	2	12	0	0	1.5
张中祥	1	2018-01-09	2018-01-16	54.0219	1	5	150	55	24.4444	64488	1	2	2	5	3	3	1	103	39.2	1.73	0	16.5	0	3	2018-01-11	320	150	0	1	1	2	2	1	4	160	4	1	1	1	1	2	0	0	2.7	2	13	0	0	2
张法海	1	2017-05-16	2017-05-27	69.3315	1	9	164	71	26.398	44636	1	2	2	4	3	1	1	148	49.3	0.42	0	13.67	0	2	2017-05-18	300	100	0	1	1	2	2	2	4	180	4	2	1	1	2	2	0	0	2.8	2	10	1	1	1.8
王仲玉	1	2015-10-22	2015-11-02	48.063	1	6	165	75	27.5482	65144	1	2	2	4	2	3	1	155	47.8	7.04	1	10.15	0	3	2015-10-27	240	50	0	1	1	2	2	1	5	200	6	1	1	1	2	2	0	0	4.3	2	14	1	1	2
琚炳超	1	2017-04-20	2017-05-02	53.2137	1	8	172	61	20.6193	44149	1	1	1	5	3	3	1	134	45.3	3.61	0	12.68	0	2	2017-04-24	230	100	0	1	1	2	2	2	6	220	4	2	1	1	2	2	0	0	4.3	3	12	1	2	1.5
李治东	1	2015-11-29	2015-12-13	51.0603	1	9	171	76	25.9909	42175	1	3	2	5	2	1	1	139	43.2	7.32	1	51.76	1	1	2015-12-04	180	60	0	1	1	2	3	2	7	220	5	3	2	1	2	2	0	0	4.3	2	13	1	2	2.2
孔维平	2	2017-01-21	2017-02-01	53.9616	1	7	150	40	17.7778	65512	1	3	3	5.5	3	3	1	111	47.6	1.53	0	16.04	0	3	2017-01-25	190	40	0	1	1	2	3	2	5	200	6	2	1	1	2	2	0	0	3.3	2	12	1	3	1.1
丁腊梅	2	2017-07-02	2017-07-15	63.5205	1	7	155	42	17.4818	45406	1	2	2	5	3	3	1	117	36.3	6.75	1	10.17	0	3	2017-07-08	230	100	0	1	1	2	2	1	4	120	4	1	1	1	1	2	0	0	5.3	2	13	1	3	1.8
钟家友	1	2016-04-14	2016-04-22	65.5123	1	7	176	79	25.5036	36118	1	2	2	5	2	3	1	130	43.1	2.57	0	10.98	0	3	2016-04-15	260	120	0	1	1	2	2	2	6	250	6	2	1	1	2	2	0	0	5.3	2	12	1	4	1
胡申付	1	2015-10-07	2015-10-17	44.4603	1	7	174	98	32.3689	39467	1	2	2	6	2	2	1	129	46	2.87	0	3.25	0	3	2015-10-10	270	120	0	1	1	2	2	1	5	180	5	3	2	1	2	2	0	0	2.6	3	12	1	5	2
高峰	1	2018-06-07	2018-06-22	45.4521	1	10	180	62	19.1358	41088	1	1	2	6	3	2	1	144	42.3	26.4	1	9.83	0	3	2018-06-12	200	50	0	1	0	2	6	4	6	250	5	3	2	2	3	2	0	0	4.3	3	17	1	5	2
张卫兵	1	2016-09-28	2016-10-20	49.6685	1	11	180	65	20.0617	61387	1	2	2	6	2	1	0	129	43.3	1.29	0	2.78	0	1	2016-10-09	225	200	0	1	0	2	4	2	5	100	3	2	1	1	3	1	1	1	6.3	2	10	0	0	1.3
高小文	1	2017-02-09	2017-02-24	50.8082	1	9	175	82	26.7755	66247	2	3	2	6	2	1	0	150	46	1.36	0	7.59	0	1	2017-02-15	280	150	0	1	1	2	2	1	5	250	4	2	1	2	2	1	7	1	4.1	2	11	0	0	1.3
陈良珍	2	2017-01-08	2017-01-24	59.7726	1	12	163	95	35.756	62513	2	3	3	6	3	2	0	133	39.5	2.34	0	12.26	0	3	2017-01-12	210	100	0	1	0	2	5	3	5	250	5	2	2	1	3	1	9	1	4.3	2	13	1	1	1.1
朱少学	1	2016-10-08	2016-10-21	63.2712	1	9	165	66	24.2424	75237	1	3	3	5	2	1	0	146	40.7	8.83	1	16.16	0	1	2016-10-12	330	40	0	1	1	2	5	3	8	300	8	2	1	1	3	1	13	1	4.8	2	12	0	0	0.3
吴自宏	1	2018-04-04	2018-04-19	51.526	1	9	170	77	26.6436	54834	1	2	2	5	2	2	0	140	43.3	1.37	0	8.33	0	3	2018-04-10	295	120	0	1	1	2	4	3	6	240	4	2	1	1	3	1	13	1	4.8	2	14	0	0	1.1
汤玉如	1	2015-05-15	2015-06-01	63.937	1	11	175	68	22.2041	56200	1	2	1	6	2	1	0	143	43.2	4.98	0	54.72	1	1	2015-05-21	300	100	0	1	0	2	5	3	8	200	9	2	1	1	3	1	13	1	5.3	2	11	0	0	2
储秀珍	2	2016-07-10	2016-07-27	47.6055	1	10	155	56	23.3091	58595	1	2	2	4	2	3	1	146	39.1	0.91	0	6.51	0	3	2016-07-17	260	50	0	1	1	2	3	2	7	220	7	2	1	1	2	1	13	1	4.8	4	19	1	10	1.1
方有元	1	2016-02-18	2016-03-08	43.0356	1	14	175	72	23.5102	49625	1	2	2	5	1	1	0	161	48.7	1.77	0	6.33	0	1	2016-02-23	255	100	0	1	0	2	3	2	9	300	6	2	2	1	3	1	1	2	2.8	2	11	1	1	1.1
赵宜保	1	2017-09-29	2017-11-11	51.4932	1	32	172	72	24.3375	97145	1	2	2	5	2	1	0	147	131	1.26	0	5.4	0	1	2017-10-10	160	20	0	1	0	2	4	3	9	400	6	2	2	2	3	1	1	2	2.3	3	18	0	0	1.8
黄明仁	1	2015-08-23	2015-09-23	78.0712	2	15	172	68	22.9854	81234	2	5	3	6	1	1	0	99	35	1.92	0	4.56	0	1	2015-09-08	300	100	0	1	0	1	6	5	7	300	6	4	2	2	4	1	1	2	3.1	3	15	0	0	2.1
李国平	1	2017-11-27	2018-01-22	50.3151	1	41	168	72	25.5102	49898	1	2	2	6	3	3	1	118	44.7	1.99	0	11.78	0	3	2017-12-12	280	100	0	1	0	2	4	3	5	150	4	3	2	2	5	1	2	2	2.3	3	17	1	1	2
李结军	1	2017-04-07	2017-04-18	29.0877	1	7	170	57	19.7232	48209	1	1	2	3.5	2	1	0	131	41.6	1.24	0	7.15	0	1	2017-04-11	210	100	0	1	1	2	2	1	4	240	4	1	1	1	2	1	3	2	3.5	2	12	0	0	0.6
赵宜胜	1	2017-06-27	2017-07-15	59.1863	1	12	172	68	22.9854	62226	2	2	2	5	3	2	1	138	44.2	0.75	0	4.7	0	3	2017-07-03	305	100	0	1	1	2	3	3	5	140	4	2	1	1	2	1	5	2	2.3	2	19	1	2	1.3
黄开应	1	2018-06-12	2018-06-28	54.7068	1	9	175	61	19.9184	53065	1	2	2	5	2	1	0	149	44.3	2.89	0	2.52	0	1	2018-06-19	300	100	0	1	1	2	3	2	6	160	4	2	2	1	3	1	6	2	5.3	2	15	0	0	1.5
尹若根	1	2017-06-09	2017-06-27	57.0055	1	14	167	45	16.1354	53112	2	1	3	6	3	1	0	150	39.8	2.66	0	4.5	0	2	2017-06-13	255	100	0	1	1	2	2	1	5	200	5	2	2	1	2	1	6	2	4.3	2	16	1	2	1.3
程顺华	1	2016-11-17	2016-12-09	75.1781	2	16	184	94	27.7647	61024	2	4	3	6	2	1	0	95	35.5	29.28	1	11.38	0	1	2016-11-23	350	100	0	1	1	2	7	5	8	300	5	2	2	1	5	1	9	2	3.1	2	10	0	0	1.3
张彩侠	2	2016-12-03	2016-12-25	74.8822	2	14	142	56	27.7723	62232	1	4	3	4.5	1	2	0	131	41	10.49	1	1.25	0	2	2016-12-11	380	200	0	1	1	2	3	2	6	200	5	3	1	1	2	1	9	2	4.3	2	14	1	1	1.2
高治中	1	2017-10-16	2017-11-08	52.0192	1	16	163	60	22.5827	57965	1	1	2	6	2	2	0	140	44.5	3.38	0	5.38	0	3	2017-10-23	270	30	0	1	1	2	6	5	7	200	5	2	1	1	2	1	9	2	2.1	2	13	1	2	2.2
朱利民	1	2016-09-02	2016-09-19	53.8137	1	15	167	70	25.0995	115659	2	2	2	5	2	1	1	139	35	1.76	0	17.76	0	1	2016-09-04	390	100	0	1	1	2	4	3	9	500	8	2	2	2	3	1	13	2	1.3	2	10	0	0	1.3
曹传兴	1	2017-01-03	2017-01-19	58.2027	1	8	162	65	24.7676	67413	1	3	3	5	3	3	1	121	35.8	1.34	0	10.2	0	3	2017-01-11	240	100	0	1	1	2	2	2	6	350	8	2	1	1	3	1	13	2	3.3	2	12	0	0	1.3
唐永为	1	2018-04-02	2018-05-09	66.1151	1	30	168	55	19.487	129160	1	2	2	5	2	1	0	141	35.6	1.56	0	10.79	0	1	2018-04-09	320	150	0	1	1	1	7	6	10	300	10	3	3	2	8	1	1	3	5.3	2	11	0	0	1.3
王玉树	1	2017-05-21	2017-06-06	54.2219	1	9	176	83	26.7949	52529	1	2	2	6	3	1	0	154	44.1	2.26	0	8.42	0	2	2017-05-28	280	100	0	1	1	2	2	1	6	260	3	2	1	1	2	1	3	4	5.3	1	9	0	0	1.2
李怀娥	2	2017-06-19	2017-07-12	60.0685	1	16	155	52	21.6441	59978	1	2	2	5	2	3	1	135	42	3.2	0	9.8	0	3	2017-06-26	150	100	0	1	1	2	4	2	7	280	3	1	1	1	2	1	1	3	4	4	21	1	19	2
杨爱云	2	2016-05-31	2016-06-09	41.9233	1	7	162	52	19.8141	46322	1	1	1	5	3	3	0	135	42.6	3.13	0	7.17	0	3	2016-06-02	250	100	0	1	1	2	3	2	4	200	4	1	1	1	2	2	0	0	4	2	13	1	5	1
郭其英	2	2015-12-16	2016-01-02	70.1589	2	12	155	54	22.4766	56985	1	2	2	6	2	2	0	99	44.2	56.55	1	29.79	0	2	2015-12-21	260	100	0	1	0	2	3	3	6	220	5	2	1	1	3	2	0	0	5.5	4	12	1	6	2
汤业国	1	2015-10-10	2015-10-31	66.2219	1	12	172	63	21.2953	51836	1	2	2	6	2	2	0	127	41.6	3.1	0	3.53	0	3	2015-10-19	220	100	0	1	1	2	3	2	5	200	5	2	1	1	2	2	0	0	5	2	12	1	4	2.5
周兰贤	2	2015-10-12	2015-10-24	74.789	2	8	158	48	19.2277	38494	1	5	3	6	2	3	0	130	34.1	5.12	1	44.7	1	3	2015-10-16	180	100	0	1	0	2	4	2	5	200	5	2	2	1	2	2	0	0	3.5	2	22	1	18	2.5
刘翠英	2	2018-05-24	2018-06-10	63.8137	1	13	159	48	18.9866	53945	1	2	2	5	2	1	0	89	36.9	4.6	0	19.61	0	1	2018-05-28	150	50	0	1	1	2	3	2	6	200	5	2	2	1	2	2	0	0	5	2	17	0	0	2
王龙平	2	2017-03-28	2017-04-12	59.674	1	7	163	61	22.9591	42600	1	2	2	5	3	3	0	118	39.5	1.3	0	4.46	0	3	2017-04-05	210	100	0	1	1	2	4	3	5	180	4	2	1	1	3	2	0	0	5	2	15	1	5	0.8
杨顺姐	2	2017-09-25	2017-10-16	45.063	1	17	160	54	21.0938	39463	1	2	2	6	3	3	1	116	35.5	1.1	0	9.38	0	3	2017-09-29	180	100	0	1	0	2	4	2	5	250	7	2	2	1	4	1	7	2	3.4	2	12	1	6	1.5
刘树祥	1	2017-06-13	2017-06-29	59.6521	1	10	170	62	21.4533	51983	1	2	2	4.5	2	1	1	133	46.2	2.07	0	8.83	0	1	2017-06-19	360	200	0	1	1	2	3	2	5	200	4	1	1	1	2	2	0	0	5.3	2	19	0	0	0.8
赵宏成	1	2017-03-13	2017-04-11	84.6575	2	21	170	74	25.6055	51825	2	4	3	5	3	2	0	153	43.1	3	0	21.71	0	3	2017-03-21	200	100	0	1	1	2	5	3	9	240	8	2	2	1	4	1	6	2	3.5	2	14	1	1	1.2
梁加齐	1	2016-06-30	2016-07-25	75.2548	2	19	165	62	22.7732	58080	1	2	2	6	3	1	0	136	39.6	143.6	1	17.33	0	2	2016-07-06	180	80	0	1	0	2	4	3	6	200	7	2	1	1	3	1	1	2	4.5	2	14	0	0	2
朱圣虎	1	2017-07-18	2017-07-28	54.0795	1	7	170	69	23.8754	40001	1	2	2	6	3	2	0	155	47.8	3.5	0	4.3	0	3	2017-07-21	190	100	0	1	1	2	4	3	5	160	5	2	2	1	3	1	2	2	3.5	2	26	1	21	2
黄维河	1	2017-08-05	2017-08-19	35.4548	1	9	175	81	26.449	49603	1	2	2	5	2	1	0	143	43.8	1.22	0	5.4	0	1	2017-08-10	250	100	0	1	1	2	3	2	5	200	5	1	1	1	2	1	6	1	2.5	4	10	0	0	1
姚双伍	1	2015-04-15	2015-04-29	71.1205	2	8	176	86	27.7634	37643	1	1	1	5	2	1	0	121	38.7	1.1	0	2.87	0	1	2015-04-21	170	80	0	1	1	2	3	2	5	180	5	2	1	1	3	2	0	0	6	2	15	0	0	0.8
吴桂芳	2	2016-03-30	2016-04-24	48.2849	1	17	156	55	22.6003	43263	1	1	2	6	2	3	1	117	41.9	34.9	1	11.46	0	3	2016-04-07	200	100	0	1	0	2	3	2	7	220	5	2	2	2	5	2	0	0	6.5	4	19	1	4	3
储常术	1	2015-12-08	2015-12-15	62.4329	1	5	170	60	20.7612	42885	1	2	2	5	2	1	0	138	38.5	5.61	1	22.06	0	1	2015-12-10	190	100	0	1	1	2	2	2	4	160	4	1	1	1	2	2	0	0	4.5	2	14	0	0	1.5
周桂芝	2	2017-09-12	2017-09-25	51.9315	1	8	155	50	20.8117	54525	1	2	2	5	3	3	1	110	41.8	1.24	0	9.6	0	3	2017-09-17	240	120	0	1	1	2	3	2	5	200	7	1	1	1	2	2	0	0	2	2	15	0	0	0.8
石三引	2	2015-03-09	2015-03-20	68.0274	1	7	158	53	21.2306	45991	1	2	2	5	2	1	1	118	44.8	2.99	0	8.46	0	1	2015-03-13	190	100	0	1	1	2	4	3	4	180	4	3	2	2	3	2	0	0	4	2	10	1	1	1.2
杨德平	1	2015-03-24	2015-04-10	60.3589	1	10	168	53	18.7783	53061	1	2	2	5	2	2	0	129	40.6	1.06	0	11.03	0	2	2015-03-31	195	80	0	1	1	2	5	3	6	220	5	2	1	1	3	2	0	0	3	2	11	1	5	0.1
操冬梅	2	2018-04-02	2018-04-17	46.4027	1	9	158	57	22.8329	46645	1	1	2	5	2	2	0	121	40.1	3.04	0	22.6	0	2	2018-04-08	240	150	0	1	1	2	2	2	7	280	6	2	2	1	2	2	0	0	3.5	2	24	1	1	1
韩可平	1	2017-06-30	2017-07-24	53.5315	1	19	170	54	18.6851	73835	1	3	2	6	2	3	0	80	42.4	3.62	0	0.6	0	3	2017-07-05	265	150	0	1	1	2	4	3	10	350	8	2	2	2	5	1	13	2	4	3	14	1	7	1.2
唐得坤	1	2017-11-18	2017-12-08	67.011	1	15	164	62	23.0518	72632	1	2	2	6	3	2	0	145	41.1	3.09	0	9.88	0	3	2017-11-23	180	100	0	1	1	2	5	4	10	1000	8	4	2	2	4	1	1	3	7.5	2	11	1	9	0.9
王培群	2	2017-12-21	2018-01-08	45.0575	1	10	158	67	26.8386	43999	1	1	2	5	3	3	0	145	49.5	3.28	0	6.59	0	3	2017-12-29	150	50	0	1	1	2	5	4	5	220	5	2	1	1	3	2	0	0	4.5	4	10	1	3	1.3
吴红年	2	2016-07-06	2016-07-24	45.4849	1	12	165	55	20.202	52992	1	2	2	6	3	1	0	118	47.1	55.9	1	12.62	0	2	2016-07-12	160	60	0	1	0	2	3	2	6	220	6	2	1	1	3	2	0	0	6	4	24	1	18	2
万本立	1	2015-11-11	2015-11-30	59.5534	1	11	170	64	22.1453	67463	1	1	1	5	2	2	0	126	42	5.71	1	14.85	0	2	2015-11-19	260	100	0	1	1	2	5	4	6	220	6	2	1	1	3	2	0	0	6	2	11	1	6	1
施运凤	2	2016-10-11	2016-10-24	66.0274	1	10	162	53	20.1951	41218	1	2	2	6	2	1	0	139	44.7	4.23	0	6.78	0	3	2016-10-14	195	100	0	1	0	2	4	3	6	200	5	2	1	1	3	2	0	0	2.5	2	10	1	2	2
黄宝凤	2	2016-05-05	2016-05-18	62.5726	1	8	155	43	17.898	40932	2	3	2	6	2	2	0	113	44.9	24.93	1	22.26	0	3	2016-05-10	250	100	0	1	0	2	6	4	4	160	2	2	2	1	3	2	0	0	5	2	13	1	4	1.9
董家伟	1	2017-02-02	2017-02-19	45.4438	1	11	179	76	23.7196	53128	1	3	3	6	3	2	0	151	42.3	10.8	1	125.8	1	3	2017-02-08	300	200	0	1	0	2	3	3	8	250	6	2	1	1	3	2	0	0	4	4	13	1	7	1
朱利生	1	2016-12-15	2016-12-26	61.1616	1	8	171	58	19.8352	40576	2	4	2	6	3	3	0	128	38.5	4.1	0	9.23	0	3	2016-12-18	155	100	0	1	0	2	5	3	7	200	6	3	3	1	3	2	0	0	3	3	15	1	11	1
田水枝	1	2016-01-28	2016-02-12	68.7397	1	8	170	55	19.0311	46854	1	3	2	6	2	1	0	110	35.6	81.5	1	16.86	0	1	2016-02-04	240	100	0	1	0	2	5	3	6	200	5	2	2	1	4	2	0	0	4	2	17	0	0	2
管孝杰	1	2016-11-06	2016-11-21	71.874	2	8	158	54	21.6311	44120	1	4	3	4.5	3	2	1	140	47.8	5.24	1	7.36	0	3	2016-11-13	250	100	0	1	1	2	2	2	6	200	6	1	1	1	2	2	0	0	3	2	13	1	4	0.8
郑志千	1	2017-06-06	2017-06-22	76.8822	2	8	172	77	26.0276	44739	1	3	3	6	3	3	0	119	46.6	1.6	0	5.69	0	3	2017-06-14	150	50	0	1	1	2	3	3	5	170	5	2	1	1	3	1	9	2	5.5	2	14	1	4	1
彭国常	1	2017-05-18	2017-05-31	62.2466	1	8	168	62	21.9671	39484	1	2	2	5	2	2	1	134	45.3	4.21	0	14.21	0	3	2017-05-23	270	150	0	1	1	2	3	2	4	150	5	2	2	1	2	2	0	0	3	2	15	1	5	0.8
张本柱	1	2016-09-02	2016-09-16	27.8904	1	8	163	54	20.3244	39549	1	1	1	6	2	2	0	147	51.2	1.6	0	6.72	0	3	2016-09-08	180	40	0	1	0	2	5	4	6	200	5	2	1	1	3	2	0	0	5	4	12	1	4	2
李昌发	1	2015-10-11	2015-11-09	71.0164	2	21	172	63	21.2953	57124	1	3	3	6	2	1	0	113	39.5	2.33	0	6.59	0	1	2015-10-19	240	150	0	1	1	2	3	2	7	250	6	2	2	1	2	1	5	2	4.5	2	10	1	3	1.5
吴翠华	2	2017-06-23	2017-07-05	55.274	1	6	167	65	23.3067	42340	1	2	2	6	3	1	0	120	44	13.83	1	108.2	1	2	2017-06-29	180	100	0	1	0	2	3	2	7	200	8	1	1	1	2	2	0	0	5	3	17	0	0	2
王献邦	1	2018-05-13	2018-05-24	69.4877	1	7	172	77	26.0276	45144	1	1	2	6	3	1	1	146	42.8	0.84	0	6.55	0	2	2018-05-17	240	100	0	1	1	2	4	4	4	180	4	2	2	1	3	2	0	0	4	4	13	0	0	2.5
何玉义	1	2015-03-30	2015-05-06	79.2959	2	22	160	53	20.7031	84196	1	2	2	6	2	1	1	141	43.9	1.9	0	11.78	0	1	2015-04-14	210	100	0	1	0	2	5	3	9	250	9	2	2	2	4	1	9	2	4	2	10	0	0	0.1
钱之英	2	2015-02-03	2015-02-21	63.7753	1	14	155	52	21.6441	45452	1	3	3	5	2	2	0	116	44.1	13.6	1	25.63	0	2	2015-02-07	165	100	0	1	1	2	5	4	7	190	8	2	1	1	4	2	0	0	4.5	4	12	1	4	1
徐光升	1	2017-11-13	2017-11-29	79.3288	2	10	175	76	24.8163	50372	1	4	3	6	2	1	0	148	37.2	45	1	230.3	1	1	2017-11-19	210	80	0	1	0	2	4	3	8	250	6	2	2	1	2	1	5	2	6	2	14	1	2	2
计永岑	1	2018-05-07	2018-05-28	56.2411	1	14	168	65	23.03	44033	1	2	2	5	3	1	0	148	52.5	3.21	0	17.74	0	2	2018-05-14	230	100	0	1	1	2	4	2	4	180	3	1	1	1	2	2	0	0	3	3	10	1	2	1
王义虎	1	2016-06-20	2016-07-07	54.2932	1	9	170	65	22.4913	43510	1	3	3	6	2	3	1	124	40.5	6.6	1	80.2	1	3	2016-06-28	220	100	0	1	0	2	3	2	5	150	5	2	1	1	3	2	0	0	6.6	3	16	1	9	2
叶爱华	2	2017-02-28	2017-03-13	46.3808	1	7	160	59	23.0469	47061	1	2	1	5	3	1	0	107	41.7	30.85	1	17.74	0	2	2017-03-06	305	200	0	1	1	2	3	2	5	150	4	3	2	1	3	2	0	0	4.4	2	17	0	0	1
付国平	1	2016-07-04	2016-07-15	43.8849	1	9	166	76	27.5802	50383	1	2	2	6	3	3	0	140	48.8	7.1	1	14.74	0	3	2016-07-06	330	100	0	1	0	2	4	3	5	150	5	2	1	1	2	2	0	0	6	4	13	1	10	1.2
王定安	2	2016-02-19	2016-03-03	63.6329	1	7	140	43	21.9388	50662	1	2	2	6	2	2	0	134	43.6	5.2	1	18.7	0	2	2016-02-25	230	100	0	1	0	2	4	3	5	200	4	2	1	1	2	2	0	0	4.5	2	13	1	10	1.4
王新宝	1	2018-04-25	2018-05-10	46.7452	1	8	172	77	26.0276	44216	1	2	1	6	2	2	0	159	46.8	3.24	0	10.65	0	3	2018-05-02	270	150	0	1	1	2	4	3	6	200	5	2	2	1	2	2	0	0	4.5	4	12	1	3	3
安永之	2	2017-03-06	2017-03-22	42.9342	1	8	160	55	21.4844	46317	1	3	1	5	3	3	0	73	45.1	8.23	1	68.23	1	3	2017-03-14	170	100	0	1	1	2	4	3	5	200	5	2	1	1	3	2	0	0	6	2	13	1	12	1.5
刘善华	2	2017-08-06	2017-08-21	68.3425	1	8	156	58	23.833	49343	1	2	2	6	3	3	0	111	35.4	76.3	1	9.67	0	3	2017-08-13	160	50	0	1	0	2	3	2	5	200	5	2	1	1	3	2	0	0	4.3	3	19	1	10	2
李斌	1	2016-09-12	2016-10-16	45.2082	1	25	170	71	24.5675	56472	1	1	2	5	3	1	1	137	42.5	11.3	1	31.31	0	2	2016-09-21	180	50	0	1	1	2	5	3	5	180	6	2	1	1	2	2	0	0	4	2	13	1	1	1
严国民	2	2016-08-29	2016-09-18	74.5342	2	13	153	37	15.8059	45554	1	3	3	4.5	3	3	0	118	43.2	3.8	0	12.65	0	3	2016-09-05	190	80	0	1	1	2	3	2	6	200	6	1	1	1	2	1	13	1	4	1	21	1	14	0.8
黄明理	1	2016-02-18	2016-03-25	71.0521	2	30	170	83	28.7197	83905	1	2	2	6	2	3	0	121	39.3	1.8	0	5.93	0	3	2016-02-24	330	100	0	1	0	2	5	4	11	400	8	4	2	2	5	1	1	2	4.5	4	21	1	5	1.2
韦俊荣	1	2018-05-07	2018-05-22	65.8027	1	11	167	69	24.7409	47329	1	3	3	6	2	1	1	141	47.9	4.3	0	10.45	0	1	2018-05-11	155	80	0	1	0	2	3	2	6	200	5	2	2	1	2	2	0	0	4	3	11	0	0	2
袁腊梅	2	2016-12-23	2017-01-05	46.0548	1	7	156	52	21.3675	38389	1	1	1	5	3	3	1	125	47.5	5.27	1	27.26	0	3	2016-12-29	180	80	0	1	1	2	2	2	5	220	4	1	1	1	2	2	0	0	3.5	3	12	1	4	0.1
时金木	1	2015-09-23	2015-10-14	38.0027	1	14	175	71	23.1837	55073	1	2	2	6	2	2	0	138	40.1	78.49	1	32.94	0	2	2015-09-30	220	120	0	1	1	2	3	2	5	160	5	1	1	1	2	1	1	2	5	4	17	0	0	1
束学菊	2	2017-03-24	2017-04-06	47.5726	1	8	160	50	19.5312	45792	1	1	1	6	3	1	0	117	47.6	1.4	0	8.54	0	2	2017-03-29	170	100	0	1	0	2	3	3	4	180	4	1	1	1	2	2	0	0	5	4	22	0	0	2
赵九泉	1	2018-01-02	2018-01-11	68.0493	1	7	160	74	28.9062	44213	1	3	2	6	2	3	0	143	42.4	63.53	1	19.27	0	3	2018-01-04	190	100	0	1	1	2	2	2	4	150	5	2	1	1	2	2	0	0	3	2	15	1	11	1
吴启顺	1	2015-11-09	2015-11-25	75.1151	2	13	162	60	22.8624	42193	1	2	2	6	2	2	0	131	46.8	3.7	0	15.59	0	3	2015-11-12	180	80	0	1	0	2	3	3	7	250	4	1	1	1	2	2	0	0	4	2	11	1	2	2
陈志伟	1	2018-05-17	2018-05-30	37.3507	1	8	173	67	22.3863	48127	1	2	2	5.5	2	3	0	123	39.3	2.65	0	2.82	0	3	2018-05-22	160	50	0	1	1	2	2	1	5	150	5	2	2	1	2	2	0	0	5	4	26	1	1	1.4
刘智凤	2	2017-02-17	2017-02-28	57.9068	1	6	160	62	24.2188	41731	2	2	2	6	2	2	1	115	47.8	2.03	0	28.24	0	3	2017-02-22	290	120	0	1	1	2	2	1	5	200	4	2	1	1	3	2	0	0	4	2	17	1	12	1
黄道胜	1	2016-03-29	2016-04-08	44.0438	1	7	170	85	29.4118	40123	1	1	1	6	2	3	0	136	44.8	1.25	0	10.14	0	3	2016-04-01	180	80	0	1	1	2	3	2	5	200	5	2	1	1	2	2	0	0	2.5	2	10	1	7	1
葛明珍	2	2018-01-30	2018-02-14	80.5151	2	8	142	46	22.8129	43884	1	3	2	5	3	1	0	118	42.7	4.1	0	12.88	0	2	2018-02-06	160	50	0	1	1	2	5	3	4	200	3	2	1	1	2	2	0	0	3	2	13	1	6	0.6
刘永珍	2	2015-10-21	2015-11-09	60.4658	1	14	156	63	25.8876	53213	1	2	2	6	2	3	0	126	42.1	0.93	0	9.44	0	3	2015-10-26	180	100	0	1	0	2	3	3	5	180	6	2	1	1	3	1	2	2	3.5	2	19	1	8	2
张跃芬	2	2016-06-14	2016-06-30	58.1863	1	10	163	62	23.3355	62418	2	2	2	6	3	3	0	109	44.2	1.6	0	6.8	0	3	2016-06-20	160	80	0	1	1	2	4	3	7	220	6	2	2	1	4	2	0	0	4	4	13	1	6	1.5
胡勇	1	2017-07-20	2017-08-11	44.4849	1	14	170	87	30.1038	43547	1	2	2	6	3	3	1	137	44.9	3.5	0	15.34	0	3	2017-07-28	190	100	0	1	0	2	3	3	6	190	5	2	1	1	3	2	0	0	4.5	4	12	1	5	1
邹国荣	1	2015-06-10	2015-06-25	42.6712	1	8	170	67	23.1834	45047	1	2	2	5	2	1	0	103	42.3	2.8	0	0.6	0	1	2015-06-17	190	80	0	1	1	2	2	2	4	160	4	1	1	1	2	2	0	0	4	2	14	1	11	1.5
谢道成	1	2016-12-08	2016-12-22	70.0904	2	8	170	57	19.7232	64193	1	2	2	6	1	1	0	111	41.9	3.47	0	15.65	0	1	2016-12-14	205	100	0	1	1	2	3	2	6	200	5	2	1	1	3	2	0	0	2	2	12	0	0	1.5
吴子元	1	2016-11-14	2016-12-03	73.6493	2	12	170	51	17.6471	47961	1	2	2	6	3	2	1	134	44.5	10.2	1	6.96	0	3	2016-11-21	225	120	0	1	0	2	5	4	7	220	6	1	1	1	4	2	0	0	6	4	17	1	1	1.5
袁贵德	1	2016-05-04	2016-05-19	57.0932	1	8	170	54	18.6851	38432	1	2	3	6	2	1	0	134	42.7	2.83	0	8.35	0	1	2016-05-11	180	100	0	1	0	2	4	3	6	200	5	2	2	1	2	2	0	0	3	2	14	0	0	2.5
刘宗宝	1	2017-01-06	2017-01-25	61.0137	1	9	170	62	21.4533	57788	1	2	2	5	3	1	0	114	42.2	7.6	1	8.14	0	2	2017-01-16	180	100	0	1	1	2	3	3	5	200	6	2	2	1	2	2	0	0	5	2	15	0	0	1
唐传英	2	2017-04-06	2017-04-19	53.6055	1	8	165	72	26.4463	42482	1	2	3	6	1	1	0	95	45.6	1.41	0	4.99	0	1	2017-04-11	170	60	0	1	1	2	5	3	5	200	5	3	2	1	3	2	0	0	4.5	2	20	1	1	2
魏妧珍	2	2015-01-27	2015-02-13	68.6356	1	11	158	53	21.2306	54216	1	2	2	6	2	2	0	127	42.5	49.7	1	119.1	1	3	2015-02-02	195	100	0	1	0	2	3	2	7	200	7	2	1	1	3	2	0	0	4.5	3	29	1	19	1.2
江琴	2	2016-11-20 10:53:00	2016-12-01 09:37:00	43.6	1	7	162	46	17.5278	48399	1	1	2	6	3	3	0	120	42.2	3.23	0	10.34	0	3	2016-11-24	165	50	0	1	0	2	3	3	6	220	7	2	1	1	3	2	0	0	6.5	2	16	1	5	0.4
王保家	1	2017-01-07	2017-01-15	64.2959	1	5	170	58	20.0692	47767	1	2	2	6	3	1	0	143	38.2	21.68	1	20.16	0	2	2017-01-10	200	120	0	1	1	2	3	2	4	160	4	1	1	1	2	2	0	0	4.5	2	12	0	0	0.8
谢仲遗	1	2016-11-06	2016-11-21	75.2658	2	9	175	67	21.8776	45510	1	3	3	6	2	2	0	146	41.8	3.5	0	2.34	0	3	2016-11-12	230	100	0	1	1	2	3	2	5	180	6	2	1	1	2	2	0	0	6	2	17	0	0	0.5
晏兰章	2	2015-10-22	2015-11-08	61.3178	1	12	160	59	23.0469	44737	1	1	1	5	2	3	0	126	42.9	3.2	0	10.23	0	3	2015-10-27	240	100	0	1	1	2	3	2	5	200	5	2	1	1	3	2	0	0	4	2	13	1	3	1.2
王纯东	1	2016-10-08	2016-10-21	51.0301	1	9	170	82	28.3737	41617	1	2	2	6	3	1	0	138	40	0.9	0	7.08	0	1	2016-10-12	150	50	0	1	1	2	3	2	4	100	4	1	1	1	2	2	0	0	5.5	2	18	0	0	2
雷芹修	2	2016-07-26	2016-08-09	64.8438	1	12	155	49	20.3954	42020	1	3	3	6	3	2	0	134	45.2	134.5	1	176.2	1	2	2016-07-28	180	100	0	1	0	2	4	3	6	160	6	1	1	1	3	2	0	0	4	2	16	1	2	2
董照荣	1	2017-07-20	2017-08-30	76.6548	2	31	170	59.5	20.5882	165114	1	3	2	6	3	1	0	130	41.1	1.99	0	15.99	0	2	2017-07-30	280	300	0	1	0	2	4	3	12	500	8	4	4	4	3	1	1	4	3	2	13	1	2	1
王永红	1	2017-02-07	2017-02-22	54.5863	1	9	170	57	19.7232	40263	1	2	2	5	1	1	0	140	43.8	2.6	0	8.82	0	1	2017-02-13	180	80	0	1	1	2	4	2	6	200	5	2	1	1	3	2	0	0	2.2	2	11	0	0	0.6
赵秀风	2	2016-08-04	2016-08-19	56.6466	1	8	146	40	18.7652	39481	1	2	3	6	3	2	0	98	42.8	5.63	1	16.43	0	3	2016-08-11	180	100	0	1	0	2	3	2	4	180	5	3	3	1	3	2	0	0	4.5	2	20	1	5	2
高泽明	1	2017-02-19	2017-03-01	60.3342	1	7	174	82	27.0842	56590	1	2	2	6	2	2	0	124	40.8	2.54	0	12.41	0	3	2017-02-22	240	100	0	1	0	2	3	2	4	180	4	1	1	1	2	2	0	0	4	2	12	1	3	1.4
韩德志	1	2017-01-06	2017-01-25	82.4411	2	12	166	64	23.2254	47612	1	2	2	5	2	1	0	139	45	3.36	0	63.67	1	1	2017-01-13	210	100	0	1	1	2	3	3	7	200	7	2	1	1	3	1	12	2	5.5	2	16	0	0	0.8
胡兆平	1	2016-02-15	2016-02-27	65.6603	1	8	165	66	24.2424	49482	1	1	2	6	1	1	0	156	46.4	1.74	0	5.03	0	1	2016-02-19	200	100	0	1	1	2	3	2	4	160	4	1	1	1	2	2	0	0	1.2	2	10	0	0	1.6
殷志宏	1	2016-06-13	2016-06-23	52.6137	1	6	172	72	24.3375	46298	2	2	2	6	3	1	0	149	46.1	2.01	0	5.22	0	2	2016-06-17	195	100	0	1	1	2	3	2	5	180	4	2	1	1	3	2	0	0	2.5	3	13	0	0	2
李明	1	2016-06-16	2016-07-02	50.6575	1	12	174	56	18.4965	36120	1	1	1	6	1	1	0	130	38.4	3.21	0	11.9	0	1	2016-06-20	170	80	0	1	1	2	4	2	5	300	5	1	1	1	1	2	0	0	2	2	12	0	0	1.2
侯树珍	2	2016-04-18	2016-05-04	57.7096	1	14	155	46	19.1467	43470	1	2	2	6	1	1	1	120	44.2	1.4	0	21.43	0	1	2016-04-20	170	100	0	1	0	2	3	3	5	220	5	2	1	1	3	2	0	0	3	2	11	0	0	2.5
王克柱	1	2015-07-20	2015-09-03	60.4082	1	42	160	62	24.2188	65291	1	1	1	5	2	2	0	140	42.4	2.4	0	0.6	0	3	2015-07-23	200	80	0	1	1	2	4	4	12	1000	8	2	2	2	4	1	13	1	4.5	2	12	1	1	0.5
徐玲	2	2015-11-06	2015-12-04	57.5562	1	17	164	71	26.398	69011	1	1	2	5	2	1	0	139	49	2.3	0	0.6	0	1	2015-11-17	200	80	0	1	1	2	5	3	9	250	4	2	2	2	4	2	0	0	3.5	1	9	0	0	1.2
王海	1	2015-10-30	2015-11-13	60.6548	1	9	160	50	19.5312	48397	2	3	3	6	2	1	0	135	39.3	1.96	0	16.98	0	1	2015-11-04	210	100	0	1	0	2	4	3	7	390	5	2	1	1	3	1	1	1	3.5	2	13	1	1	1.5
王淑琴	2	2015-04-01	2015-04-23	62.7918	1	13	162	53	20.1951	55693	1	2	2	5	1	1	0	134	47	5.4	1	13.08	0	1	2015-04-10	180	80	0	1	1	2	4	3	6	200	6	2	1	1	3	2	0	0	3.5	2	11	0	0	0.6
苏建平	1	2016-01-19	2016-01-28	46.5616	1	7	169	75	26.2596	44361	1	1	1	6	2	1	0	148	41	3.9	0	18.64	0	1	2016-01-21	190	100	0	1	0	2	4	2	4	200	4	1	1	1	2	2	0	0	5	2	11	0	0	2
汪云翠	2	2016-07-02	2016-07-28	66.5397	1	16	155	54	22.4766	56877	1	2	2	6	3	1	0	111	42.1	6.5	1	0.62	0	2	2016-07-12	240	150	0	1	0	2	4	3	6	220	6	3	2	2	3	2	0	0	2.5	4	8	0	0	1
左从英	2	2016-04-20	2016-05-04	50.5397	1	8	165	67	24.6097	44454	1	2	2	6	2	2	0	127	51.2	5.5	1	34.13	0	3	2016-04-26	175	80	0	1	0	2	3	2	5	200	4	1	1	1	2	2	0	0	5	2	16	1	3	1.8
高佳佳	2	2015-06-30	2015-07-21	24.2329	1	13	163	51	19.1953	48888	1	3	2	4.5	2	2	0	73	41.4	3.3	0	2.18	0	3	2015-07-08	310	200	0	1	1	2	2	2	5	220	5	2	1	1	3	2	0	0	5.5	4	10	1	1	1.2
唐开芝	2	2015-10-27	2015-11-20	75.9233	2	14	155	45	18.7305	55012	1	3	3	6	2	2	0	132	44.5	3.3	0	40.45	1	3	2015-11-06	150	100	0	1	0	2	6	4	7	240	4	2	2	1	4	2	0	0	3.5	1	19	1	1	2.8
王成芝	2	2016-05-09	2016-05-22	68.1808	1	9	160	66	25.7812	37654	1	1	2	6	2	1	0	119	42.2	1.1	0	6.55	0	1	2016-05-13	130	60	0	1	1	2	5	3	6	190	6	2	2	1	3	2	0	0	4	2	16	0	0	3.2
周道海	1	2016-01-25	2016-02-07	62.1068	1	9	172	65	21.9713	46031	1	1	2	6	2	2	1	124	42.4	6.5	1	10.5	0	3	2016-01-29	180	80	0	1	0	2	5	3	6	200	5	2	1	1	3	2	0	0	2	2	8	1	1	2
谭赛平	1	2015-09-03	2015-09-15	49.7123	1	7	171	62	21.2031	46279	2	2	2	6	1	2	0	121	39.2	2.78	0	2.21	0	3	2015-09-08	200	100	0	1	1	2	4	3	5	180	5	2	1	1	2	2	0	0	4.5	2	14	1	2	2
屠国云	2	2016-02-29	2016-03-13	47.0932	1	9	158	68	27.2392	49722	1	1	1	6	2	1	0	123	45.7	3.1	0	23.96	0	1	2016-03-04	225	100	0	1	0	2	6	4	5	200	5	2	1	1	2	2	0	0	5.5	2	9	0	0	0.5
方向辉	1	2015-12-08	2015-12-24	67.4055	1	10	170	86	29.7578	56367	2	2	2	6	2	2	0	134	44.3	4.43	0	86.15	1	2	2015-12-14	290	200	0	1	0	2	4	2	5	100	5	2	2	1	2	2	0	0	4	2	10	1	1	2
赵世泉	1	2016-09-22	2016-10-13	82.9342	2	15	169	62	21.7079	56384	2	4	3	5	3	1	0	130	35.6	3.87	0	10.08	0	2	2016-09-28	195	100	0	1	1	2	3	3	7	230	8	2	2	1	5	1	13	1	4.5	2	18	0	0	2.2
王以品	1	2017-03-23	2017-04-11	78.1616	2	11	178	67	21.1463	48734	1	3	3	6	3	2	0	140	49.2	19.73	1	35.96	1	3	2017-03-31	180	80	0	1	0	2	4	3	6	220	4	2	1	1	3	2	0	0	5	2	21	1	1	2
杨品仁	1	2016-07-30	2016-08-15	76.5068	2	12	160	40	15.625	56095	1	4	3	6	3	1	0	111	36.7	3.87	0	7.97	0	2	2016-08-03	240	100	0	1	0	2	4	4	7	220	7	2	2	1	3	2	0	0	3.5	2	16	0	0	2
李发中	1	2016-05-14	2016-06-02	79.5808	2	10	165	66	24.2424	46198	1	2	2	6	1	1	0	146	42.8	2.5	0	17.58	0	1	2016-05-23	180	80	0	1	0	2	4	3	7	220	4	2	1	1	4	2	0	0	4	3	19	0	0	2
纪正平	1	2016-05-28	2016-06-08	54.274	1	7	155	51	21.2279	40299	1	2	2	4.5	1	1	0	122	43	1.01	0	9.01	0	1	2016-06-01	185	60	0	1	1	2	2	1	5	100	4	2	2	1	2	2	0	0	2	2	16	0	0	0.4
张英	2	2017-05-22	2017-06-05	45.5781	1	10	157	63	25.5588	45413	1	1	2	6	1	1	0	129	46.3	2.9	0	9.44	0	1	2017-05-26	225	100	0	1	0	2	4	2	5	200	5	1	1	1	2	2	0	0	4	2	11	0	0	1
方少云	1	2017-01-10	2017-01-26	58.2219	1	7	172	73	24.6755	52543	1	2	2	5	1	1	0	138	40.1	2.85	0	3.9	0	1	2017-01-19	260	100	0	1	1	2	3	2	5	200	5	2	2	1	2	2	0	0	1.5	2	16	0	0	1
余丙发	1	2018-05-17	2018-06-06	63.7288	1	12	170	66	22.8374	49089	1	4	3	6	1	1	0	136	47.3	3.2	0	4.4	0	1	2018-05-25	270	200	0	1	1	2	3	2	5	250	10	3	2	2	3	2	0	0	3	1	8	0	0	1
吴菊香	2	2016-04-26	2016-05-11	70.3644	2	13	158	53	21.2306	45783	1	2	2	5	1	1	0	129	45.1	1.4	0	9.1	0	1	2016-04-28	330	100	0	1	1	2	6	4	5	200	5	2	1	1	2	2	0	0	3.5	2	14	0	0	1
董善秀	2	2015-06-24	2015-07-12	73.611	2	11	152	66	28.5665	45866	2	2	2	6	1	1	0	129	47.7	1.95	0	11.9	0	1	2015-07-01	220	150	0	1	0	2	4	3	5	200	4	1	1	1	2	2	0	0	1.4	2	8	0	0	1.5
吴玉凯	1	2017-09-25	2017-10-18	68.589	1	9	166	73	26.4915	51115	1	3	2	6	2	1	0	134	41.8	1.72	0	7.89	0	1	2017-10-09	180	100	0	1	0	2	4	3	6	350	4	2	1	1	2	2	0	0	2	2	11	0	0	2
曹之植	1	2016-06-30	2016-07-15	51.7945	1	10	174	86	28.4053	36994	1	2	2	6	1	1	0	169	37.8	1.34	0	4.86	0	1	2016-07-05	165	100	0	1	1	2	5	3	7	200	5	2	2	2	3	2	0	0	0.5	2	11	0	0	2.2
叶圣竹	2	2015-07-30	2015-08-12	62.9397	1	10	159	41	16.2177	45632	1	2	2	6	1	1	0	133	41	3.12	0	8.55	0	1	2015-08-02	200	150	0	1	0	2	3	2	5	200	4	2	1	1	3	2	0	0	0.6	2	14	0	0	2.5
马德山	1	2016-11-29	2016-12-14	71.1123	2	12	168	63	22.3214	47234	1	2	2	6	1	1	0	132	42.1	1.6	0	10.54	0	1	2016-12-02	190	80	0	1	0	2	5	3	5	200	5	2	1	1	3	2	0	0	5	2	12	0	0	2.5
孙秀玲	2	2017-10-24	2017-11-08	46.737	1	7	150	52	23.1111	41221	2	2	2	4	1	1	0	131	38.1	3	0	19.59	0	1	2017-11-01	140	100	0	1	1	2	4	2	6	200	5	3	2	2	3	2	0	0	2	2	8	0	0	0.5
张晓明	1	2017-06-01	2017-06-13	54.7699	1	8	174	77	25.4327	43271	1	1	2	6	1	1	0	152	47.3	1.31	0	2.86	0	1	2017-06-05	180	100	0	1	1	2	3	2	5	220	4	2	1	1	2	2	0	0	6	2	19	0	0	0.5
张振季	2	2017-03-02	2017-03-15	62.4082	1	8	153	58	24.7768	44272	1	2	2	5	2	1	0	127	42.1	2.94	0	6.24	0	1	2017-03-07	220	100	0	1	1	2	5	3	6	200	6	2	1	1	3	2	0	0	5	2	12	0	0	0.5
钟业琴	2	2018-03-15	2018-03-29	64.611	1	9	150	53	23.5556	47174	1	2	2	5	2	1	0	115	43.4	2.4	0	9.32	0	1	2018-03-20	160	60	0	1	1	2	6	4	5	180	4	2	1	1	3	2	0	0	4	2	12	0	0	0.5
周开利	1	2017-08-13	2017-08-25	47.8384	1	9	173	72	24.0569	43286	1	2	3	4.5	2	1	0	143	42.7	3.7	0	6.42	0	1	2017-08-16	280	100	0	1	1	2	2	2	4	200	4	1	1	1	2	2	0	0	2.5	2	12	0	0	0.6
申克军	1	2016-07-30	2016-08-15	51.7534	1	8	172	76	25.6896	39976	1	2	3	4	2	1	0	154	47.8	1.47	0	1.47	0	1	2016-08-07	270	60	0	1	1	2	2	2	6	350	6	1	1	1	1	2	0	0	4	2	11	0	0	0.6
夏菊荣	2	2017-08-25	2017-09-11	68.9507	1	12	161	62	23.9188	40631	1	2	2	5	2	1	0	125	40	3.6	0	10.26	0	1	2017-08-30	180	80	0	1	1	2	5	4	6	180	6	2	2	1	4	2	0	0	4	4	13	0	0	0.6
刘长枝	2	2017-10-29	2017-11-07	71.4027	2	6	160	52	20.3125	40011	1	4	2	5	1	1	0	121	40.8	3.29	0	17.39	0	1	2017-11-01	255	100	0	1	1	2	2	1	5	200	6	2	2	1	2	2	0	0	3.5	2	12	0	0	0.6
马平东	1	2016-10-16	2016-11-01	71.4959	2	10	175	77	25.1429	38091	2	2	2	6	2	1	0	140	42.5	1.77	0	6.02	0	1	2016-10-22	195	100	0	1	0	2	3	2	7	300	8	2	1	1	3	2	0	0	4	2	10	0	0	0.6
李思好	1	2016-08-19	2016-09-04	57.7671	1	8	170	72	24.9135	44514	1	2	2	5	2	1	0	131	42.9	3.51	0	38.98	1	1	2016-08-27	230	100	0	1	1	2	5	3	6	300	6	2	2	2	3	2	0	0	2.4	1	13	1	3	0.6
张良英	2	2017-04-06	2017-04-21	53.0986	1	9	165	63	23.1405	45610	1	1	2	6	2	1	0	136	40.9	1.24	0	6.17	0	1	2017-04-12	265	150	0	1	1	2	2	1	5	200	4	1	1	1	2	2	0	0	3.5	2	13	0	0	0.8
彭西仁	1	2017-09-08	2017-09-20	78.0712	2	6	156	42	17.2584	42342	1	2	2	4	2	1	0	99	41.8	3.21	0	19.68	0	1	2017-09-14	200	100	0	1	1	2	4	3	7	220	5	2	1	1	3	2	0	0	2.5	1	16	0	0	0.8
徐维贤	2	2016-07-04	2016-07-13	60.7753	1	6	155	50	20.8117	46979	1	2	2	6	2	2	0	133	44.5	2	0	13.58	0	3	2016-07-07	200	100	0	1	0	2	3	3	4	160	4	1	1	1	2	2	0	0	2	2	15	1	2	0.8
方泽玉	1	2015-04-17	2015-05-09	40.8438	1	17	170	65	22.4913	60162	1	2	2	6	1	1	0	147	46.7	2	0	9.48	0	1	2015-04-22	270	100	0	1	0	2	4	4	9	320	6	2	2	2	6	2	0	0	1.5	2	17	0	0	1
王林凤	1	2016-03-16	2016-03-30	58.2438	1	8	175	72	23.5102	44735	1	2	2	5	1	1	0	135	46.4	4.69	0	16.44	0	1	2016-03-22	180	60	0	1	1	2	3	2	5	200	6	2	1	1	3	2	0	0	1.5	2	17	0	0	1
张守侠	2	2016-09-18	2016-09-28	64.6685	1	8	158	60	24.0346	43865	1	2	2	5	2	1	0	119	41.3	2.58	0	6.71	0	1	2016-09-20	190	100	0	1	1	2	4	3	5	160	4	2	1	1	3	2	0	0	2	2	11	0	0	1
方宗贵	1	2017-09-05	2017-09-19	67.263	1	9	165	62	22.7732	41903	1	5	3	6	1	1	0	95	39.6	1	0	4.94	0	1	2017-09-10	180	100	0	1	1	2	4	3	4	180	5	2	2	1	2	2	0	0	1.5	2	17	0	0	1
张德进	1	2017-03-15	2017-03-27	59.4411	1	7	168	67	23.7387	59444	1	1	2	6	1	2	0	134	45	4.91	0	36.49	1	2	2017-03-20	200	150	0	1	1	2	3	2	6	200	6	2	1	1	2	2	0	0	1.5	2	16	1	1	1
吴小淮	1	2017-07-01	2017-07-18	61.7616	1	7	173	62	20.7157	50446	2	2	2	5	2	1	0	130	43.1	3.68	0	2.76	0	1	2017-07-11	240	100	0	1	1	2	2	2	5	260	5	1	1	1	2	2	0	0	3	4	14	1	2	1
袁广兰	2	2016-08-23	2016-09-11	58.7973	1	6	157	64	25.9645	39229	1	2	1	4	1	1	0	143	43.3	2.1	0	10.13	0	1	2016-09-05	260	100	0	1	1	2	2	2	4	250	4	1	1	1	2	2	0	0	4	2	9	0	0	1.2
罗德生	1	2016-06-20	2016-07-03	69.811	2	9	165	52	19.1001	55290	1	2	2	5	1	1	0	126	46.1	2.6	0	8.27	0	1	2016-06-24	180	80	0	1	1	2	3	2	6	200	6	1	1	1	2	2	0	0	1.2	2	11	0	0	1.2
汤芬朝	2	2016-04-06	2016-04-18	62.5479	1	7	160	64	25	52092	2	3	2	6	1	1	0	137	44.9	1.2	0	10.96	0	1	2016-04-11	170	80	0	1	0	2	2	2	6	200	6	1	1	1	2	2	0	0	3	2	12	1	1	1.2
祝海燕	2	2016-04-12	2016-04-22	36.0192	1	8	155	53	22.0604	36140	1	1	2	6	1	1	0	110	40.1	0.8	0	12.55	0	1	2016-04-14	200	100	0	1	0	2	3	2	5	160	5	1	1	1	2	2	0	0	3	2	14	0	0	1.8
李云英	2	2017-12-28	2018-01-14	44.3068	1	11	150	57	25.3333	44317	1	1	2	6	1	1	0	130	42.3	2.2	0	3.81	0	1	2018-01-03	180	100	0	1	1	2	3	3	7	300	6	2	2	1	3	2	0	0	3.5	2	16	0	0	2
路前岳	1	2015-11-12	2015-11-30	44.6438	1	12	183	67	20.0066	42273	1	1	2	6	1	1	0	137	41	1	0	8.51	0	1	2015-11-18	160	80	0	1	0	2	4	3	6	200	6	2	1	1	2	2	0	0	2	2	13	0	0	2
吴国银	1	2017-02-21	2017-03-05	53.8685	1	9	172	80	27.0416	40056	1	2	2	6	2	1	0	135	44.1	2.3	0	10.34	0	1	2017-02-24	180	60	0	1	0	2	4	3	4	160	4	1	1	1	2	2	0	0	5	2	23	0	0	2
陈新民	2	2016-12-22	2017-01-08	61.8575	1	13	160	59	23.0469	43620	1	2	2	6	2	1	0	140	51.6	2.3	0	17.95	0	1	2016-12-26	180	60	0	1	0	2	5	4	6	220	6	2	1	1	3	2	0	0	3	2	15	0	0	2
施友礼	1	2017-11-03	2017-11-24	67.3041	1	15	164	60	22.3081	47418	1	3	2	6	1	1	0	106	34.6	4.6	0	13.94	0	1	2017-11-09	180	50	0	1	0	2	4	3	6	200	4	2	1	1	3	2	0	0	2.3	2	17	0	0	2
郭树森	1	2015-09-23	2015-10-13	72.1562	2	15	163	57	21.4536	45231	2	2	2	6	1	1	0	141	39.4	1.6	0	1.6	0	1	2015-09-28	180	150	0	1	1	2	4	3	5	200	5	2	1	1	3	2	0	0	2.5	1	19	0	0	2
吕金华	1	2018-03-27	2018-04-16	73.9288	2	13	170	60	20.7612	46530	1	3	2	6	1	1	0	131	41.8	2.14	0	8.06	0	1	2018-04-03	190	50	0	1	0	2	5	3	8	300	6	3	3	2	3	2	0	0	2.5	2	13	0	0	2
胡少霞	2	2017-10-25	2017-11-10	74.7014	2	9	158	74	29.6427	46120	1	1	1	6	1	1	0	127	46.8	2.3	0	12.42	0	1	2017-11-01	225	100	0	1	0	2	4	2	6	190	5	2	1	1	3	2	0	0	2	2	13	0	0	2
李家海	1	2017-02-28	2017-03-20	81.6685	2	14	168	74	26.2188	41906	1	2	2	6	1	1	0	141	46.3	1.96	0	13.24	0	1	2017-03-06	180	80	0	1	0	2	6	4	7	200	8	2	2	1	6	2	0	0	2	1	19	0	0	2
操旺胜	1	2018-05-18	2018-06-01	52.9068	1	9	165	65	23.8751	48333	1	2	2	6	1	2	0	150	49.3	2.03	0	10.48	0	2	2018-05-23	180	100	0	1	0	2	5	3	5	200	5	1	1	1	3	2	0	0	3	2	18	1	1	2
刘贵珍	2	2015-07-08	2015-07-20	61.3671	1	7	150	60	26.6667	43192	2	3	2	6	1	1	0	108	49.8	0.5	0	6.05	0	1	2015-07-13	480	250	1	1	1	2	3	2	5	150	4	2	1	1	2	2	0	0	1.5	2	8	0	0	2.5
廖克凤	2	2017-02-27	2017-03-20	64.4932	1	13	164	56	20.8209	45304	1	2	2	6	1	1	0	130	45.9	1.6	0	11.11	0	1	2017-03-07	200	100	0	1	0	2	4	3	5	200	4	2	1	1	3	2	0	0	5	2	15	0	0	2.5
王德珍	2	2017-04-28	2017-05-09	69.9452	2	6	163	71	26.7229	49484	2	2	3	6	1	1	0	128	41	1.66	0	10.7	0	1	2017-05-03	265	150	0	1	0	2	4	3	4	150	5	2	1	1	2	2	0	0	5	1	14	0	0	2.5
姚祥梅	2	2015-10-14	2015-10-28	61.8247	1	9	155	57	23.7253	39274	1	2	2	6	1	1	0	129	50.5	3.6	0	27.93	0	1	2015-10-19	160	50	0	1	0	2	3	3	6	220	5	1	1	1	3	2	0	0	1.8	2	17	0	0	2.8
杨芳	2	2018-02-26	2018-03-12	47.3726	1	6	160	67	26.1719	45448	1	1	1	6	2	1	0	129	38.7	1.6	0	8.65	0	1	2018-03-06	135	50	0	1	0	2	2	2	4	180	3	2	1	1	2	2	0	0	5.5	2	21	0	0	0.5
万德清	2	2017-03-05	2017-03-20	63.1014	1	11	158	55	22.0317	42997	1	2	2	4.5	2	1	0	120	42.8	1.3	0	9.57	0	1	2017-03-09	190	100	0	1	1	2	4	3	5	220	5	2	1	1	2	2	0	0	2	2	14	0	0	0.8
罗运华	1	2017-08-21	2017-09-04	67.2027	1	11	152	39	16.8802	44369	1	3	3	5	2	1	0	116	43.4	2.29	0	13.26	0	1	2017-08-24	240	100	0	1	1	2	3	2	5	300	6	3	3	2	3	2	0	0	5	2	20	0	0	0.8
刘克华	2	2016-11-23	2016-12-05	70.5178	2	7	168	67	23.7387	41438	1	2	2	5	2	1	0	127	44.2	1.2	0	12.02	0	1	2016-11-28	270	100	0	1	1	2	3	2	5	180	6	1	1	1	2	2	0	0	2	2	13	0	0	0.8
苏秀华	2	2017-08-29	2017-09-17	64.1342	1	15	152	44	19.0443	44234	1	2	2	5	2	1	0	120	42.3	2.47	0	10.53	0	1	2017-09-02	190	50	0	1	1	2	3	2	5	200	5	2	1	1	3	2	0	0	4	2	10	1	2	0.8
张喜才	1	2015-09-12	2015-09-23	31.1918	1	7	170	74	25.6055	51581	1	2	2	6	2	1	0	145	43.4	2.6	0	3.45	0	1	2015-09-16	300	100	0	1	1	2	4	3	5	180	5	2	1	1	3	2	0	0	2.5	1	15	0	0	1
马连雨	1	2018-02-09	2018-02-23	37.137	1	11	175	74	24.1633	48338	1	1	1	6	2	1	0	138	38.5	0.7	0	5.07	0	1	2018-02-12	180	50	0	1	1	2	5	3	6	180	7	3	2	2	3	2	0	0	4.5	2	16	0	0	1
陆玉荣	2	2017-06-18	2017-07-09	48.3014	1	10	160	46	17.9688	39712	1	4	2	6	2	1	0	96	37.4	2.05	0	35.03	1	1	2017-06-29	180	100	0	1	1	2	3	1	4	200	3	2	2	1	2	2	0	0	5	2	23	0	0	1
杨文凤	2	2018-05-11	2018-05-27	51.6082	1	11	160	74	28.9062	48140	1	1	2	5	2	1	0	126	45	1.09	0	3.13	0	1	2018-05-16	180	100	0	1	1	2	5	3	6	200	6	2	1	1	2	2	0	0	1.6	2	20	0	0	1
胡庆生	1	2016-08-22	2016-09-05	53.3233	1	7	169	65	22.7583	50316	1	1	2	4.5	2	2	0	120	43.9	13.28	1	13.97	0	3	2016-08-29	240	100	0	1	1	2	2	1	4	100	4	2	1	1	2	2	0	0	6	2	17	0	0	1
武放兵	1	2016-06-28	2016-07-09	59.0219	1	8	170	70	24.2215	38934	1	1	2	6	1	1	0	161	42.7	5.68	1	8.87	0	1	2016-07-01	165	70	0	1	1	2	3	2	6	180	6	2	1	1	2	2	0	0	4	3	14	0	0	1
陈飞	1	2017-07-12	2017-07-22	59.1425	1	5	160	58	22.6562	33875	1	2	2	4	1	1	0	149	40.1	7.1	1	11.42	0	1	2017-07-17	220	120	0	1	1	2	2	2	4	150	4	1	1	1	2	2	0	0	4	2	11	0	0	1
宁国芳	2	2017-04-06	2017-04-17	60.0795	1	7	158	50	20.0288	46900	2	3	2	5	2	1	0	96	41.5	120.2	1	30.43	0	1	2017-04-10	225	100	0	1	1	2	3	3	5	160	4	2	1	1	2	2	0	0	4	2	15	0	0	1
王东超	1	2015-11-11	2015-12-02	63.1315	1	15	170	68	23.5294	59944	2	2	2	5	1	1	0	155	49.9	3.5	0	34.59	0	1	2015-11-17	270	150	0	1	1	2	5	3	6	240	5	2	2	1	3	2	0	0	2.6	2	14	0	0	1
李修凤	2	2016-05-21	2016-06-07	72.0356	2	11	169	62	21.7079	45550	1	3	3	5	2	1	0	125	38.4	0.71	0	6	0	1	2016-05-27	220	80	0	1	1	2	4	3	7	200	5	2	1	1	2	2	0	0	2.5	2	14	0	0	1
程东合	1	2017-03-28	2017-04-20	88.9589	2	15	170	58	20.0692	57186	1	4	3	6	2	1	0	113	39.6	6.9	1	9.92	0	1	2017-04-05	225	120	0	1	0	2	4	4	9	250	9	2	2	1	5	2	0	0	2.5	4	9	0	0	1
高影	2	2017-09-22	2017-10-08	47.5699	1	12	159	71	28.0843	46256	1	2	2	5.5	2	1	0	133	43.6	3.53	0	9.57	0	1	2017-09-26	200	100	0	1	1	2	3	2	5	200	4	2	1	1	2	2	0	0	1	4	8	1	2	1
朱祥凤	2	2017-12-16	2018-01-02	71.2466	2	10	151	44	19.2974	43389	1	4	2	5.5	2	3	0	111	41.9	3.41	0	5.9	0	3	2017-12-23	210	100	0	1	1	2	4	3	6	300	5	2	1	1	3	2	0	0	3	2	12	1	2	1
周庆凤	2	2017-08-26	2017-09-13	73.1918	2	9	155	62	25.8065	44141	1	2	2	5	2	1	0	133	40.6	9.5	1	42.34	1	1	2017-09-04	260	120	0	1	1	2	3	2	7	320	4	1	1	1	2	2	0	0	3	2	14	1	3	1
汤传红	1	2016-07-04	2016-07-17	56.3425	1	5	166	52	18.8707	42319	1	3	2	4	1	1	0	123	41.3	9.31	1	12.15	0	1	2016-07-12	280	100	0	1	1	2	3	2	5	200	5	1	1	1	2	2	0	0	3	2	10	0	0	1.2
朱瑞伦	1	2015-05-28	2015-06-10	59.0959	1	9	172	53	17.9151	41964	1	2	2	5	2	1	0	127	42.1	1.86	0	6.89	0	1	2015-06-01	210	100	0	1	1	2	4	2	5	200	4	1	1	1	2	2	0	0	3	2	17	0	0	1.2
张丹和	1	2017-08-12	2017-08-28	59.3425	1	13	165	69	25.3444	44472	1	3	2	5	3	1	0	143	34.3	5.3	1	5.85	0	2	2017-08-15	240	100	0	1	1	2	2	2	8	220	6	2	2	1	2	2	0	0	3.3	2	12	0	0	1.2
刘先伦	1	2018-05-11	2018-05-24	67.9425	1	8	170	84	29.0657	49950	1	2	2	5	3	1	0	143	42.4	3.11	0	12.14	0	2	2018-05-16	190	80	0	1	1	2	4	2	6	220	6	1	1	1	2	2	0	0	4	2	14	0	0	1.2
黄大书	1	2016-06-26	2016-07-11	76.9151	2	9	170	62	21.4533	51542	1	2	2	5.5	2	1	0	115	42.9	5.78	1	17.78	0	1	2016-07-02	310	100	0	1	1	2	3	2	5	150	4	2	2	1	2	2	0	0	3.5	2	12	1	1	1.2
卢泽	1	2017-11-16	2017-11-26	51.2192	1	8	170	78	26.9896	48125	1	1	2	6	2	2	0	123	42.3	1.81	0	7.73	0	3	2017-11-18	240	100	0	1	1	2	2	1	5	200	5	1	1	1	2	2	0	0	4	4	15	1	2	1.2
刘邦伟	1	2017-08-22	2017-09-12	59.2274	1	10	175	59	19.2653	50580	1	2	2	6	2	1	0	140	40.9	2	0	7.84	0	1	2017-09-02	255	50	0	1	1	2	2	2	5	200	5	2	1	1	2	2	0	0	3.5	2	12	1	7	1.2
赵春强	1	2018-01-11	2018-01-29	63.3534	1	13	165	67	24.6097	50948	2	2	2	6	2	1	0	134	41.6	2.3	0	12.34	0	1	2018-01-16	200	100	0	1	0	2	3	2	6	160	3	1	1	1	2	2	0	0	6	2	18	0	0	1.4
甘永宗	1	2015-03-20	2015-04-07	75.3096	2	11	157	46	18.662	48532	1	3	3	5.5	2	1	0	132	41.1	5.38	1	10.42	0	1	2015-03-27	265	100	0	1	1	2	4	3	6	180	6	2	2	1	3	2	0	0	5	4	12	0	0	1.4
胡秀玉	2	2016-11-13	2016-12-04	68.6438	1	9	153	51	21.7865	57816	1	3	3	6	2	3	0	99	42.4	2.26	0	19.04	0	3	2016-11-25	160	100	0	1	1	2	2	2	6	250	6	1	1	1	2	2	0	0	4	2	12	1	5	1.4
杨立胜	1	2016-06-11	2016-06-24	57.0219	1	9	160	62	24.2188	41363	1	2	2	5	2	1	0	146	45	5.08	1	6.21	0	1	2016-06-15	190	100	0	1	1	2	3	2	6	200	4	1	1	1	2	2	0	0	7	2	12	0	0	1.5
王万福	1	2017-11-27	2017-12-23	65.789	1	12	174	87	28.7356	44939	1	3	3	6	2	1	0	130	40.9	4.5	0	19.24	0	1	2017-12-11	200	200	0	1	1	2	5	3	9	300	8	3	3	2	6	2	0	0	5	2	10	0	0	1.5
戴荣芳	2	2018-04-26	2018-05-10	68.3315	1	8	155	53	22.0604	41826	1	3	2	6	2	1	0	119	44	1.88	0	6.85	0	1	2018-05-02	140	40	0	1	0	2	3	2	6	100	6	1	1	1	2	2	0	0	3	3	8	0	0	1.5
胡达仁	1	2016-12-27	2017-01-14	69.8521	2	10	171	52	17.7832	42891	1	3	2	6	3	1	0	143	45	2.14	0	28.12	0	2	2017-01-04	160	50	0	1	1	2	3	2	5	180	4	2	1	1	2	2	0	0	3	3	17	0	0	1.5
谈宜华	2	2016-01-15	2016-02-04	67.3342	1	13	155	48	19.9792	41210	1	3	3	6	2	2	0	137	42.7	4.2	0	28.34	0	3	2016-01-22	180	100	0	1	0	2	3	3	5	220	5	1	1	1	2	2	0	0	3	2	13	1	2	1.5
陈世达	1	2018-01-23	2018-02-05	48.3781	1	10	178	75	23.6713	41693	1	1	1	5	2	1	0	128	39.2	1.6	0	8.78	0	1	2018-01-26	180	80	0	1	1	2	5	3	7	220	6	1	1	1	1	2	0	0	5	2	16	0	0	1.6
彭宗侠	2	2018-05-24	2018-06-05	72.4959	2	9	155	55	22.8928	40904	1	4	3	6	2	1	0	124	44.9	6.62	1	18.24	0	1	2018-05-27	170	80	0	1	0	2	3	2	5	200	5	1	1	1	2	2	0	0	5	2	16	0	0	1.6
王桂明	1	2018-01-01	2018-01-25	59.6274	1	15	173	67	22.3863	49304	1	2	2	6	2	1	0	135	41.2	21.9	1	11.01	0	1	2018-01-10	150	50	0	1	0	2	3	3	5	170	4	2	1	1	2	2	0	0	5	1	18	0	0	1.8
邢应何	1	2015-07-29	2015-08-15	68.5726	1	12	165	66	24.2424	46981	1	2	2	6	2	1	0	137	39.3	4.1	0	14.77	0	1	2015-08-03	240	100	0	1	0	2	3	3	5	160	4	2	1	1	2	2	0	0	5	2	11	0	0	1.8
蒋召新	1	2016-02-29	2016-03-14	72.3151	2	11	160	69	26.9531	45796	1	1	1	6	1	1	0	139	38.9	6	1	9.86	0	1	2016-03-03	170	80	0	1	0	2	3	2	7	220	5	2	1	1	3	2	0	0	4	2	16	0	0	1.8
郝淑平	2	2016-08-31	2016-09-14	37.1014	1	9	160	58	22.6562	42181	1	1	2	6	2	1	0	126	43.9	2.4	0	24.73	0	1	2016-09-05	160	50	0	1	0	2	5	3	5	180	4	2	1	1	2	2	0	0	2.8	4	16	0	0	2
许成余	1	2017-02-14	2017-02-27	46.6603	1	7	168	65	23.03	46132	1	3	2	6	3	1	0	157	51.3	1.51	0	7.88	0	2	2017-02-20	180	50	0	1	0	2	3	1	4	180	4	2	2	2	3	2	0	0	3	2	11	0	0	2
桂玉胜	1	2016-11-24	2016-12-17	46.8877	1	18	165	54	19.8347	50894	1	2	2	6	2	1	0	130	40.6	6.7	1	10.57	0	1	2016-11-29	220	100	0	1	0	2	5	3	6	200	5	2	1	1	3	2	0	0	3	1	15	0	0	2
江中建	1	2018-03-28	2018-04-11	47.1096	1	8	170	82	28.3737	40734	1	2	2	6	3	1	0	146	43.4	0.77	0	7.05	0	2	2018-04-03	180	50	0	1	0	2	5	3	5	200	4	2	1	1	2	2	0	0	4.5	2	11	0	0	2
伍德兰	2	2015-11-23	2015-12-04	49.9918	1	8	162	60	22.8624	37053	1	1	2	6	2	1	0	132	44.2	1.45	0	4.87	0	1	2015-11-26	150	50	0	1	1	2	3	2	5	200	5	2	2	1	2	2	0	0	3	2	11	0	0	2
孙守云	2	2017-03-12	2017-04-01	50.4192	1	12	164	66	24.539	43238	1	2	2	6	2	1	0	120	43.1	1.4	0	0.6	0	1	2017-03-20	235	150	0	1	1	2	4	3	6	300	4	2	2	1	2	2	0	0	3	2	18	0	0	2
贾贤芳	2	2015-10-05	2015-10-19	51.0082	1	10	155	64	26.6389	43452	1	2	1	6	2	1	0	134	47.6	1.77	0	14.36	0	1	2015-10-09	170	80	0	1	0	2	5	3	6	300	5	2	1	1	2	2	0	0	3	2	12	0	0	2
袁永菊	2	2015-03-28	2015-04-11	52.389	1	11	158	56	22.4323	44765	2	1	2	6	2	1	0	137	44.5	6.7	1	57.45	1	1	2015-03-31	170	100	0	1	0	2	6	4	9	240	7	2	1	1	5	2	0	0	4	2	11	0	0	2
盛大和	1	2016-08-29	2016-09-13	52.5671	1	9	165	70	25.7117	45096	1	2	3	5	2	1	0	152	45.8	3.78	0	7.06	0	1	2016-09-04	260	200	0	1	1	2	2	1	5	180	5	2	2	1	2	2	0	0	2.5	2	8	0	0	2
胡清华	1	2017-08-21	2017-09-06	52.9973	1	12	170	64	22.1453	46770	1	2	2	6	3	1	0	139	46.4	4.6	0	2.14	0	2	2017-08-25	180	100	0	1	0	2	4	3	6	200	5	2	1	1	2	2	0	0	5.3	4	12	0	0	2
汪为玲	2	2015-04-10	2015-04-24	55.3096	1	9	162	56	21.3382	38102	1	2	2	6	2	1	0	131	40.3	1.42	0	19.09	0	1	2015-04-15	150	80	0	1	0	2	3	2	5	200	4	1	1	1	2	2	0	0	5	2	13	0	0	2
王兆仙	1	2016-04-16	2016-04-28	58.4904	1	7	170	57	19.7232	42716	1	2	2	6	2	1	0	146	41.8	4.2	0	6.59	0	1	2016-04-21	190	80	0	1	0	2	5	3	4	150	4	2	1	1	4	2	0	0	3	2	14	0	0	2
陈敬东	1	2016-11-01	2016-11-20	60.6904	1	13	167	71	25.4581	49397	1	2	2	6	2	1	0	129	41.6	2.3	0	13.26	0	1	2016-11-07	190	100	0	1	0	2	4	3	5	160	5	1	1	1	2	2	0	0	2.5	2	15	0	0	2
何宏绪	1	2015-11-04	2015-11-18	60.7863	1	12	168	72	25.5102	40425	1	2	2	6	1	1	0	130	39	3.37	0	8.25	0	1	2015-11-06	160	80	0	1	0	2	4	4	6	220	6	2	2	1	3	2	0	0	3.5	2	16	0	0	2
贾月荣	2	2016-09-18	2016-10-03	62.9616	1	10	150	49	21.7778	45300	1	2	2	6	2	1	0	120	42.6	1.1	0	10.45	0	1	2016-09-23	180	50	0	1	0	2	5	3	5	180	5	2	2	1	4	2	0	0	3.7	2	10	0	0	2
申银双	2	2016-10-21	2016-11-04	63.3288	1	9	170	75	25.9516	42023	1	2	1	6	1	1	0	142	39.5	5.39	1	63.15	1	1	2016-10-26	210	60	0	1	0	2	4	2	5	180	4	3	2	2	3	2	0	0	3	2	9	0	0	2
陆士俊	1	2016-11-10	2016-12-02	63.463	1	14	165	67	24.6097	50060	1	2	2	6	2	1	0	163	43.9	3.81	0	32.6	0	1	2016-11-18	270	100	0	1	1	2	2	2	4	160	6	3	2	1	3	2	0	0	2.5	4	7	0	0	2
张玉叶	2	2015-10-30	2015-11-14	64.926	1	7	160	51	19.9219	60777	1	2	3	6	2	1	0	97	38.9	18.74	1	19.35	0	1	2015-11-07	190	100	0	1	0	2	4	3	6	300	6	2	1	1	3	2	0	0	5.3	2	14	0	0	2
李玉玲	2	2017-02-24	2017-03-09	65.3014	1	9	156	65	26.7094	40389	1	3	2	6	2	1	0	107	41.3	5.57	1	12.42	0	1	2017-02-28	170	60	0	1	0	2	4	3	6	150	4	3	2	1	3	2	0	0	3.5	2	11	0	0	2
赵道友	1	2017-08-30	2017-09-14	68	1	8	170	53	18.3391	40970	1	2	2	6	2	1	0	145	38.2	2.3	0	5.63	0	1	2017-09-06	130	50	0	1	1	2	5	3	6	250	4	3	2	1	3	2	0	0	6.6	2	19	0	0	2
潘仁华	1	2015-12-10	2015-12-25	68.9863	1	10	168	64	22.6757	46181	2	2	2	6	2	1	0	132	43.1	1.8	0	5.95	0	1	2015-12-15	180	80	0	1	0	2	3	2	4	190	4	1	1	1	2	2	0	0	3.5	2	14	0	0	2
王玉云	2	2015-12-02	2015-12-15	71.126	2	8	152	48	20.7756	39154	2	3	3	5	2	2	0	132	46.7	2.3	0	10.23	0	3	2015-12-07	260	100	0	1	1	2	2	2	4	200	4	1	1	1	2	2	0	0	3	2	8	0	0	2
李帮明	1	2016-05-02	2016-05-20	72.5973	2	10	178	88	27.7743	47814	1	2	2	6	2	1	0	137	40.1	7.9	1	30.43	0	1	2016-05-10	130	60	0	1	0	2	5	3	6	180	4	2	1	1	2	2	0	0	4	2	8	0	0	2
聂美英	2	2017-02-08	2017-02-19	73.6301	2	9	153	52	22.2137	45156	1	4	3	6	1	1	0	88	37.2	2.9	0	7.31	0	1	2017-02-10	143	50	0	1	0	2	4	3	5	200	4	2	1	1	2	2	0	0	4	2	13	0	0	2
郑光泽	1	2017-06-27	2017-07-25	75.1068	2	21	168	67	23.7387	81540	1	5	3	6	2	1	0	108	31.7	5.83	1	16.59	0	1	2017-07-04	285	150	0	1	1	2	4	3	4	180	3	3	2	2	3	2	0	0	4	1	14	0	0	2
袁传茹	2	2016-09-21	2016-10-09	75.7726	2	10	158	58	23.2335	55682	1	2	2	5	2	1	0	133	49.3	3.16	0	8.06	0	1	2016-09-29	265	100	0	1	1	2	3	3	5	160	5	2	1	1	2	2	0	0	3	4	14	0	0	2
何传高	1	2016-02-15	2016-03-10	77.1753	2	9	165	48	17.6309	60429	1	1	2	6	2	1	0	136	43.8	2.2	0	2	0	1	2016-03-01	180	80	0	1	1	2	5	4	5	200	5	2	1	1	2	2	0	0	4	2	13	0	0	2
吴正英	2	2016-03-17	2016-04-01	51.1973	1	9	152	54	23.3726	48081	1	1	2	6	2	2	0	124	46.8	2.7	0	22.97	0	3	2016-03-23	330	100	1	1	0	2	5	3	5	220	4	2	1	1	2	2	0	0	3.1	2	14	1	2	2
丁常转	2	2016-10-15	2016-11-02	53.6219	1	12	160	64	25	47574	1	1	1	6	2	1	0	124	43.3	50.2	1	67.46	1	1	2016-10-21	190	80	0	1	0	2	5	3	4	80	4	2	2	1	2	2	0	0	3	2	9	1	2	2
邓大华	1	2016-11-11	2016-11-27	72.2932	2	14	170	60	20.7612	41350	1	2	2	6	2	1	0	107	33.5	3.2	0	3.8	0	1	2016-11-13	190	100	0	1	1	2	4	4	8	250	6	2	1	1	2	2	0	0	4.5	1	14	1	2	2
项爱华	2	2016-11-04	2016-11-20	72.8822	2	9	159	52	20.5688	39878	1	2	2	6	2	3	0	135	42.9	9.3	1	7.24	0	3	2016-11-11	140	100	0	1	0	2	4	4	6	300	6	2	2	1	3	2	0	0	3	2	17	1	9	2
张社权	1	2017-12-14	2017-12-28	39.3288	1	8	175	84	27.4286	43629	1	1	1	6	2	1	0	140	45	2.7	0	4.35	0	1	2017-12-20	145	50	0	1	1	2	3	1	4	200	4	1	1	1	2	2	0	0	4	2	14	0	0	2.4
丁希学	1	2015-07-17	2015-08-01	44.8082	1	10	165	61	22.4059	41072	1	1	1	6	1	1	0	106	45.5	1.79	0	5.46	0	1	2015-07-22	150	50	0	1	0	2	5	3	5	200	4	2	1	1	3	2	0	0	2.5	2	12	0	0	2.5
汪爱华	2	2016-07-18	2016-07-31	50.9123	1	8	155	62	25.8065	37234	1	2	2	6	2	1	0	132	42.9	0.88	0	9.27	0	1	2016-07-23	150	100	0	1	0	2	3	2	4	160	6	1	1	1	2	2	0	0	2.8	2	12	0	0	2.5
曹连发	1	2017-02-24	2017-03-11	53.4904	1	9	170	77	26.6436	45461	1	1	2	6	2	1	0	166	47.1	3.8	0	2.61	0	1	2017-03-02	230	100	0	1	1	2	4	2	6	260	5	3	2	2	3	2	0	0	4	2	12	0	0	2.5
未文明	1	2018-04-04	2018-04-18	64.1096	1	8	170	64	22.1453	41089	1	2	2	6	2	1	0	149	44.5	2.3	0	5.54	0	1	2018-04-10	150	50	0	1	1	2	4	2	4	180	4	2	1	1	2	2	0	0	6.7	2	17	0	0	2.5
陶金芝	2	2016-12-14	2016-12-31	65.9863	1	10	157	50	20.2848	41609	1	1	2	6	2	1	0	119	41.9	1.7	0	7.33	0	1	2016-12-21	190	80	0	1	0	2	4	3	7	240	6	2	1	1	3	2	0	0	4	4	12	0	0	2.5
刘永泉	1	2015-09-09	2015-09-23	69.4219	1	9	172	67	22.6474	39780	2	2	2	6	2	1	0	130	41.3	3.23	0	5.13	0	1	2015-09-14	160	100	0	1	1	2	4	3	5	150	4	3	1	1	3	2	0	0	4	2	10	0	0	2.5
胡家贵	1	2015-04-09	2015-04-22	78.6329	2	9	172	67	22.6474	41664	1	1	2	6	2	1	0	134	41.3	1.74	0	23.06	0	1	2015-04-13	180	50	0	1	0	2	4	2	6	220	6	2	1	1	3	2	0	0	4.5	2	16	0	0	2.5
薛光成	1	2015-08-12	2015-08-24	56.6027	1	10	173	55	18.3768	41113	1	1	2	6	1	1	0	141	45.4	3.61	0	5.3	0	1	2015-08-14	180	100	0	1	1	2	4	3	5	160	5	3	1	1	3	2	0	0	3	2	13	0	0	2.8
吴君福	1	2018-04-26	2018-05-16	80.4301	2	9	160	47	18.3594	48014	1	4	3	6	2	1	0	123	39.4	0.69	0	5.45	0	1	2018-05-07	150	50	0	1	1	2	5	3	7	250	6	3	1	1	3	2	0	0	3	2	33	0	0	2.8
何金龙	1	2016-07-24	2016-08-11	44.9671	1	12	162	57	21.7193	41299	1	1	1	6	2	1	0	165	48.6	8.7	1	21.72	0	1	2016-07-30	255	150	0	1	0	2	4	3	5	200	4	2	1	1	3	2	0	0	5	2	5	0	0	0.4
刘士社	1	2017-10-17	2017-10-26	61.1534	1	8	165	50	18.3655	50325	1	2	2	4	2	1	0	132	44.6	3.38	0	13.45	0	1	2017-10-18	260	100	0	1	1	2	3	2	4	200	4	1	1	1	1	2	0	0	4	2	17	0	0	0.4
吴咏梅	2	2018-04-16	2018-04-28	65.3342	1	9	160	60	23.4375	38949	1	2	2	5	3	1	0	131	40.8	4.23	0	5.68	0	2	2018-04-19	195	100	0	1	1	2	2	2	5	260	5	1	1	1	2	2	0	0	3	4	10	0	0	0.4
沈世和	1	2016-08-09	2016-08-22	61.5726	1	10	172	74	25.0135	53701	1	2	2	5	2	1	0	140	41	3.42	0	8.44	0	1	2016-08-12	180	100	0	1	1	2	4	3	5	250	4	2	2	1	2	2	0	0	5.5	3	15	0	0	0.5
卞修清	1	2018-04-20	2018-05-07	62.5233	1	13	175	82	26.7755	46321	1	1	1	5	2	1	0	143	50.6	2.34	0	4.34	0	1	2018-04-24	255	100	0	1	1	2	3	2	7	280	7	2	2	1	2	2	0	0	2.5	2	15	0	0	0.5
刘承勋	1	2017-08-15	2017-08-28	72.6603	2	9	174	72	23.7812	56612	1	3	2	6	2	1	0	145	45.1	5.21	1	19.05	0	1	2017-08-19	150	50	0	1	1	2	3	2	5	120	5	2	1	1	3	2	0	0	2.8	2	18	0	0	0.5
阮永华	1	2017-10-12	2017-10-29	74.0384	2	10	175	62	20.2449	42630	1	3	3	6	3	1	0	142	43.2	4.2	0	3.24	0	2	2017-10-19	190	100	0	1	1	2	4	2	6	180	6	2	1	1	2	2	0	0	2	1	19	0	0	0.7
申红莲	2	2017-12-28	2017-01-14	37.9151	1	11	158	50	20.0288	55726	1	2	2	6	2	1	0	125	41.3	20.65	1	16	0	1	2017-01-03	200	100	0	1	1	2	3	3	6	260	4	1	1	1	1	2	0	0	7	2	14	0	0	0.8
张侠	2	2017-08-15	2017-09-03	40.0438	1	12	156	62	25.4767	42142	1	3	2	5	3	1	0	108	35.9	99.01	1	81.46	1	2	2017-08-22	130	30	0	1	1	2	4	4	7	300	7	3	2	1	3	2	0	0	5	2	15	0	0	0.8
刘道海	1	2015-04-30	2015-05-22	45.3123	1	9	169	58	20.3074	41927	1	1	1	6	2	1	0	150	46.8	7.67	1	7.9	0	1	2015-05-13	250	100	0	1	0	2	4	3	6	220	5	2	1	1	2	2	0	0	5	2	12	0	0	0.8
胡云士	1	2016-08-04	2016-08-22	58.9918	1	10	178	59	18.6214	44181	1	2	2	5	3	1	0	142	45.4	10.19	1	44.14	1	2	2016-08-12	190	100	0	1	1	2	5	3	5	200	4	1	1	2	4	2	0	0	3.5	2	17	0	0	0.8
徐光梅	2	2015-01-14	2015-01-28	68.9041	1	9	155	59	24.5578	46678	1	2	2	5	2	1	0	133	46.8	3.75	0	9.85	0	1	2015-01-19	170	60	0	1	1	2	4	3	6	220	8	2	1	1	3	2	0	0	3	2	9	0	0	0.8
孟宪林	1	2016-12-22	2017-01-06	53.2356	1	9	167	74	26.5338	38969	1	2	2	5	2	3	0	142	39.9	1.81	0	54.21	1	3	2016-12-28	150	100	0	1	1	2	4	2	6	300	6	3	2	2	3	2	0	0	4.5	2	9	1	5	0.8
杨勇	1	2017-09-12	2017-10-04	57.9918	1	15	172	72	24.3375	39567	1	2	2	6	2	1	0	131	40.7	1.33	0	5.68	0	1	2017-09-19	220	60	0	1	1	2	3	2	5	160	5	2	1	1	2	2	0	0	2.5	2	12	1	2	0.9
马文	1	2016-10-21	2016-11-02	38.5781	1	8	173	72	24.0569	46961	1	2	2	5	3	1	0	142	43.2	3	0	6.26	0	2	2016-10-25	240	100	0	1	1	2	4	3	6	200	6	2	1	1	3	2	0	0	6	3	16	0	0	1
朱明霞	2	2017-07-05	2017-07-27	40.4575	1	10	162	50	19.052	51276	1	2	2	6	2	1	0	97	48.1	1.11	0	9.87	0	1	2017-07-17	250	120	0	1	0	2	2	2	5	180	4	1	1	1	2	2	0	0	6.5	4	12	0	0	1
张茂堂	1	2016-07-08	2016-07-27	56.7507	1	13	171	57	19.4932	50154	1	1	2	5	2	1	1	120	43.3	2.48	0	6.72	0	1	2016-07-14	240	100	0	1	1	2	2	1	5	150	6	1	1	1	2	2	0	0	5	2	16	0	0	1
张德照	1	2017-05-03	2017-05-14	59.3808	1	6	161	50	19.2894	46990	1	2	2	6	2	1	0	134	46.6	1.8	0	10.41	0	1	2017-05-08	170	50	0	1	0	2	3	2	4	180	4	1	1	1	2	2	0	0	3	2	10	0	0	1
张桂娟	2	2016-08-05	2016-08-21	60.6356	1	12	165	58	21.3039	44168	1	2	2	5	3	1	0	136	45.7	2	0	11.7	0	2	2016-08-09	240	100	0	1	1	2	4	3	5	200	4	2	1	1	2	2	0	0	3	2	10	0	0	1
王春景	2	2016-06-15	2016-07-04	61.2986	1	10	160	54	21.0938	48123	1	2	2	5	3	1	0	126	48	2.2	0	8.44	0	2	2016-06-24	160	100	0	1	1	1	3	3	5	160	5	1	1	1	3	2	0	0	5	2	11	0	0	1
桂龙姣	2	2015-03-09	2015-03-22	61.4329	1	10	158	68	27.2392	39494	1	1	1	5	2	1	0	121	50.2	3.34	0	10.69	0	1	2015-03-12	205	100	0	1	1	2	3	3	5	180	5	2	1	1	4	2	0	0	3.5	4	9	0	0	1
魏长云	1	2018-02-28	2018-03-13	62.5233	1	7	172	92	31.0979	44640	1	1	2	6	2	1	0	151	44.8	3.2	0	10.34	0	1	2018-03-06	135	60	0	1	0	2	3	2	5	200	4	1	1	1	2	2	0	0	5	1	16	0	0	1
陈和青	1	2016-08-04	2016-08-21	66.7315	1	7	172	47	15.887	32579	1	3	3	5	3	1	0	148	39.6	9.63	1	9.19	0	2	2016-08-14	250	150	0	1	1	1	2	2	4	250	5	1	1	1	3	2	0	0	4	2	10	0	0	1
高金香	2	2017-10-24	2017-11-03	69.4904	1	8	155	42	17.4818	36016	2	4	2	6	2	1	0	120	36	4.8	0	107.2	1	1	2017-10-26	190	100	0	1	0	2	4	3	4	180	3	2	1	1	2	2	0	0	3	2	10	0	0	1
张福庆	1	2015-11-19	2015-12-07	73.3781	2	14	162	53	20.1951	43475	1	2	2	6	2	1	0	136	43.6	52.73	1	114.02	1	1	2015-11-23	180	100	0	1	0	2	3	3	6	200	6	2	1	1	2	2	0	0	5	3	11	0	0	1
朱祥梅	2	2016-12-23	2017-01-09	54.7288	1	13	155	56	23.3091	42624	1	2	2	5	3	1	0	127	43.6	13.8	1	376.2	1	2	2016-12-27	170	80	0	1	1	2	3	3	5	200	5	1	1	1	2	2	0	0	4.5	4	16	1	1	1
徐子洲	1	2015-07-27	2015-08-14	76.6712	2	10	163	67	25.2174	45930	1	3	3	6	2	1	0	124	45.5	2.5	0	14.73	0	1	2015-08-04	280	120	0	1	1	2	3	2	6	200	5	1	1	1	2	2	0	0	3	2	18	1	1	1
李玉连	2	2016-01-25	2016-02-04	51.1315	1	7	160	55	21.4844	39024	1	1	1	6	2	1	0	146	40.6	1.14	0	12.6	0	1	2016-01-28	255	150	0	1	1	2	3	2	5	180	4	2	1	1	2	2	0	0	2.7	2	12	0	0	1.2
尹传信	1	2015-10-26	2015-11-11	51.2877	1	9	172	57	19.2672	45571	1	1	1	5	2	1	0	133	41.7	5.4	1	18.38	0	1	2015-11-02	190	100	0	1	1	2	3	3	5	180	4	2	1	1	3	2	0	0	4	2	18	0	0	1.2
胡玉娥	2	2016-11-27 09:28:00	2016-12-12 09:05:00	52.0137	1	11	165	63	23.1405	39623	2	2	2	5	3	1	0	123	41.5	2.8	0	15.69	0	2	2016-12-01	165	50	0	1	1	2	4	2	6	220	4	1	1	1	2	2	0	0	4	2	16	0	0	1.2
赵先松	1	2016-06-02	2016-06-23	62.9753	1	16	162	54	20.5761	45382	1	3	2	4.5	3	1	0	112	37.1	6.31	1	9.23	0	2	2016-06-07	240	100	0	1	1	2	2	2	6	200	4	2	2	1	2	2	0	0	5.5	4	17	0	0	1.2
单成跃	1	2015-02-10	2015-02-25	69.1014	1	10	170	72	24.9135	40967	2	2	2	5	2	1	0	137	41.8	2.98	0	14.58	0	1	2015-02-15	210	50	0	1	1	2	5	4	6	220	6	2	2	1	3	2	0	0	5	2	11	0	0	1.2
白和明	1	2016-05-17	2016-06-06	76.6274	2	14	175	64	20.898	44223	1	3	3	5	3	1	0	128	44.6	2.7	0	8.93	0	2	2016-05-23	240	100	0	1	1	1	4	2	6	200	6	2	1	1	3	2	0	0	6	2	18	0	0	1.2
裴章泳	2	2017-05-26	2017-06-14	80.9479	2	9	155	42	17.4818	42523	1	5	3	5	2	1	0	131	47	4.3	0	10.6	0	1	2017-06-05	165	100	0	1	1	2	3	2	6	200	4	1	1	1	2	2	0	0	3.5	2	10	0	0	1.2
彭望远	1	2018-04-16	2018-05-07	81.0795	2	12	161	62	23.9188	39140	1	4	2	6	2	1	0	137	43.5	3.7	0	5.92	0	1	2018-04-25	130	60	0	1	1	2	4	3	7	240	6	3	2	1	3	2	0	0	5	1	11	0	0	1.2
周锦秀	2	2017-08-02	2017-08-18	61.589	1	11	165	74	27.1809	43870	1	2	2	5	2	1	0	119	39.7	22.82	1	9.29	0	1	2017-08-07	270	150	0	1	1	2	3	2	7	250	4	3	2	2	3	2	0	0	5	3	14	1	1	1.2
严志来	1	2017-07-26	2017-08-11	50.8274	1	10	170	72	24.9135	43314	1	1	2	6	2	1	0	140	43	0.6	0	6.6	0	1	2017-08-01	230	100	0	1	0	2	6	3	5	260	4	3	2	2	3	2	0	0	4	2	16	1	4	1.2
李四壹	1	2018-04-12	2018-05-14	46.3534	1	21	168	73	25.8645	58394	1	2	2	6	3	3	0	157	50.4	35.1	1	83	1	3	2018-04-23	180	80	0	1	0	2	3	2	6	260	4	2	1	1	3	2	0	0	3.5	1	13	1	8	1.2
陈守红	2	2017-02-08	2017-02-20	47.3781	1	7	178	63	19.8839	45904	1	2	2	6	2	1	0	125	38.2	2.96	0	12.2	0	1	2017-02-13	270	120	0	1	1	2	2	1	5	150	5	1	1	1	2	2	0	0	6	2	21	0	0	1.4
范瑞顶	1	2018-04-26	2018-05-18	64.5945	1	15	170	77	26.6436	45218	2	3	3	6	3	1	0	151	43.8	27.69	1	17.8	0	2	2018-05-03	200	180	0	1	0	2	5	3	9	300	8	3	3	2	4	2	0	0	4	2	9	0	0	1.4
葛敏文	1	2016-04-07	2016-04-25	67.7918	1	10	168	56	19.8413	44424	1	2	2	5	2	1	0	112	40.1	0.9	0	8.05	0	1	2016-04-15	220	100	0	1	1	2	3	2	5	200	3	1	1	1	2	2	0	0	4.5	2	16	0	0	1.4
张毛才	1	2016-03-30	2016-04-16	40.9973	1	11	172	75	25.3515	42489	1	2	2	6	2	1	0	153	44	7.79	1	8.87	0	1	2016-04-05	185	100	0	1	0	2	2	2	5	160	5	1	1	1	2	2	0	0	4.5	2	15	0	0	1.5
胡云霞	2	2017-03-08	2017-03-18	45.5123	1	8	165	55	20.202	45298	1	2	2	5	3	1	0	126	39.8	6.4	1	13.46	0	2	2017-03-10	200	200	0	1	1	2	4	3	5	220	5	2	1	1	3	2	0	0	2.5	2	13	0	0	1.5
郑相凤	2	2016-03-10	2016-03-22	48.5918	1	8	169	77	26.9598	45246	2	1	2	5	2	1	0	142	44.6	7.34	1	4.5	0	1	2016-03-14	180	80	0	1	1	2	3	2	5	180	5	1	1	1	2	2	0	0	4	4	10	0	0	1.5
李光树	1	2016-06-28	2016-07-15	52.7918	1	12	172	67	22.6474	42389	1	3	2	6	2	1	0	136	46.1	2.99	0	7.78	0	1	2016-07-03	230	80	0	1	0	2	4	3	5	240	5	2	1	1	3	2	0	0	3.5	1	12	0	0	1.5
陈义现	1	2016-07-11	2016-07-25	61.211	1	9	167	72	25.8166	49987	1	1	2	6	2	1	0	163	42.3	15.42	1	0.6	0	1	2016-07-16	160	60	0	1	0	2	4	2	6	240	5	2	2	1	2	2	0	0	5	4	14	0	0	1.5
梁伙明	1	2016-10-18 10:20:00	2016-11-08 09:22:00	66.2192	1	15	155	64	26.6389	49685	2	1	1	6	3	1	0	134	42.2	5.3	1	11.5	0	2	2016-10-24	180	100	0	1	1	2	4	3	5	200	5	2	1	1	2	2	0	0	4	2	8	0	0	1.5
叶祥付	1	2016-06-30	2016-07-13	66.2274	1	9	165	55	20.202	56159	2	3	3	5.5	3	1	0	122	36.2	3	0	7.62	0	2	2016-07-04	200	100	0	1	1	2	5	3	6	190	5	2	2	1	3	2	0	0	3.5	2	10	0	0	1.5
梁庭栋	1	2016-10-01	2016-10-19	66.2603	1	11	165	57	20.9366	45190	1	2	2	6	3	1	0	135	40.2	14	1	217.8	1	2	2016-10-08	160	50	0	1	0	2	6	4	7	240	7	2	1	1	3	2	0	0	3	3	15	0	0	1.5
尚秀玲	2	2017-04-17	2017-04-29	67.0767	1	9	162	58	22.1003	42283	1	3	3	5	2	1	0	108	39.8	2.84	0	7.56	0	1	2017-04-20	300	100	0	1	1	2	3	1	5	220	4	2	2	1	3	2	0	0	7	2	17	0	0	1.5
程其江	1	2018-01-13	2018-01-28	67.8603	1	10	177	77	24.5779	45712	1	2	2	6	2	1	0	115	47.5	23.44	1	3.12	0	1	2018-01-18	235	100	0	1	0	2	3	2	6	200	5	3	2	2	3	2	0	0	3	2	9	0	0	1.5
王修保	1	2016-06-23	2016-07-09	44.0356	1	9	171	72	24.623	46150	1	1	1	6	2	2	0	136	45.4	22.4	1	10.86	0	2	2016-06-30	180	80	0	1	0	2	4	2	5	200	8	1	1	1	2	2	0	0	4.5	2	9	1	1	1.5
祁军	1	2015-02-06	2015-02-21	41.9589	1	11	175	81	26.449	36831	1	2	2	6	2	2	0	127	45.2	3.23	0	15.23	0	2	2015-02-10	240	120	0	1	0	2	3	2	5	180	5	1	1	1	2	2	0	0	4.5	2	15	1	2	1.5
胡月华	2	2016-03-01	2016-03-17	56.8329	1	9	155	48	19.9792	49104	1	1	1	6	2	1	0	139	46.8	27.2	1	29.43	0	2	2016-03-08	170	100	0	1	0	1	5	4	6	180	6	2	1	1	3	2	0	0	4	3	10	1	2	1.5
刘小波	1	2017-08-11	2017-08-27	21.0137	1	8	177	62	19.79	64319	1	2	2	5	2	1	0	121	44.7	6.21	1	14.52	0	1	2017-08-19	160	50	0	1	1	2	3	1	4	100	3	1	1	1	2	2	0	0	4.5	2	17	1	4	1.5
李永强	1	2015-01-30	2015-02-13	37.6603	1	8	176	79	25.5036	47658	1	1	1	5	2	1	0	150	46.3	103.9	1	1.5	0	1	2015-02-05	260	100	0	1	1	2	3	2	5	200	6	2	2	1	2	2	0	0	6	2	24	0	0	1.6
汪正福	1	2016-06-22	2016-07-06	44.589	1	9	167	62	22.231	45605	1	2	1	4.5	2	1	0	140	45.2	1.81	0	6.25	0	1	2016-06-27	230	100	0	1	1	2	3	1	4	100	5	1	1	1	2	2	0	0	4.5	2	14	0	0	1.6
圣业翠	2	2016-07-20	2016-08-09	50.0685	1	11	152	54	23.3726	48419	1	2	2	6	2	1	0	127	44.6	2.4	0	14.49	0	1	2016-07-29	180	60	0	1	0	2	5	3	4	140	4	1	1	1	2	2	0	0	10	2	10	0	0	1.6
耿世武	1	2015-06-24	2015-07-07	36.5397	1	9	175	78	25.4694	48166	1	2	2	5	2	1	0	159	50.1	2.3	0	3.56	0	1	2015-06-28	210	100	0	1	1	2	3	3	5	280	5	2	1	1	3	2	0	0	4.5	2	17	1	2	1.6
崔良运	1	2017-03-15	2017-03-28	53.6767	1	8	173	69	23.0546	40430	1	2	2	6	3	1	0	144	41.6	16	1	6.91	0	2	2017-03-20	180	100	0	1	0	2	3	2	5	200	5	1	1	1	2	2	0	0	4	2	19	0	0	1.8
查达培	1	2017-10-31	2017-11-18	65.0877	1	7	169	57	19.9573	41991	1	3	2	6	3	1	0	86	38.1	14.7	1	1.52	0	2	2017-11-11	200	100	0	1	0	2	5	3	5	300	5	2	1	1	3	2	0	0	2.5	2	17	0	0	1.8
刘世香	2	2018-05-23	2018-06-06	69.3507	1	10	155	62	25.8065	37440	1	4	3	5	3	1	0	136	46	1.49	0	10.73	0	2	2018-05-27	240	100	0	1	1	2	3	2	6	240	6	1	1	1	2	2	0	0	3	2	14	0	0	1.8
朱应根	1	2016-05-19	2016-06-06	70.0959	2	13	168	52	18.424	42947	1	3	2	6	2	1	0	101	35	3.13	0	5.56	0	1	2016-05-24	200	150	0	1	1	2	4	3	6	180	6	2	2	1	3	2	0	0	4	2	17	1	1	1.8
藕春荣	2	2017-07-08	2017-07-24	39.4219	1	11	158	61	24.4352	43119	1	2	2	6	2	1	0	119	41.1	0.67	0	6.51	0	1	2017-07-13	160	80	0	1	0	2	4	3	5	170	5	2	1	1	2	2	0	0	4.5	2	13	0	0	2
米高兰	2	2015-07-15	2015-08-03	40.9178	1	13	165	57	20.9366	42714	1	2	2	6	2	1	0	116	35.2	2.6	0	3.92	0	1	2015-07-21	270	120	0	1	1	2	3	3	6	220	4	1	1	1	2	2	0	0	3	2	15	0	0	2
江明	1	2017-09-10	2017-09-23	43.8	1	10	165	46	16.8962	43804	1	2	2	6	3	2	0	111	38.9	12.2	1	64.44	1	3	2017-09-13	130	100	0	1	0	2	4	3	5	180	6	2	2	1	2	2	0	0	6	2	20	0	0	2
郑向东	1	2015-09-02	2015-09-18	44.1699	1	9	168	58	20.5499	42687	1	2	2	6	2	1	0	120	42.6	4.31	0	9.15	0	1	2015-09-09	145	100	0	1	0	2	4	2	6	200	4	1	1	1	2	2	0	0	3.8	2	18	0	0	2
胡伟栋	1	2017-09-20	2017-10-01	48.8137	1	9	171	81	27.7008	42350	1	2	2	6	3	1	0	145	46.3	4.5	0	12.27	0	2	2017-09-22	185	80	0	1	0	2	5	3	6	200	4	2	1	1	3	2	0	0	5.5	2	21	0	0	2
张院生	1	2016-07-09	2016-07-21	48.8274	1	8	160	53	20.7031	46905	1	2	2	6	3	1	0	131	40.9	88.8	1	67.6	1	2	2016-07-13	180	80	0	1	0	2	4	2	5	200	5	1	1	1	2	2	0	0	5	4	11	0	0	2
陈玉环	2	2017-05-04	2017-05-17	48.8301	1	9	160	67	26.1719	40071	1	2	3	6	2	1	0	121	41	1.44	0	1.59	0	1	2017-05-08	180	100	0	1	1	2	5	3	6	200	6	2	1	1	3	2	0	0	4	1	13	0	0	2
潘晓飞	1	2016-07-18	2016-08-08	49.611	1	14	168	63	22.3214	44254	1	2	2	6	2	1	0	123	38.6	1.72	0	3.7	0	1	2016-07-25	200	80	0	1	0	2	4	2	4	100	4	2	1	1	3	2	0	0	3	3	11	0	0	2
余鸿浩	1	2015-12-28	2016-01-12	51.3123	1	12	170	76	26.2976	45866	2	2	2	6	2	1	0	141	43.5	11.2	1	8.18	0	1	2015-12-31	170	50	0	1	0	2	4	3	4	180	4	1	1	1	2	2	0	0	6	2	13	0	0	2
刘向东	1	2017-04-28	2017-05-10	51.5288	1	7	174	81	26.7539	44390	1	2	2	6	3	1	0	140	45.3	3	0	8.05	0	2	2017-05-03	180	100	0	1	0	2	4	4	5	200	4	2	1	1	3	2	0	0	4.5	4	12	0	0	2
覃小会	2	2015-10-23	2015-11-09	51.8219	1	10	155	53	22.0604	44136	1	1	2	6	2	1	0	117	39.6	5.5	1	0.6	0	1	2015-10-30	160	60	0	1	0	2	4	2	4	180	4	1	1	1	2	2	0	0	4.4	2	10	0	0	2
徐礼旺	1	2016-07-18	2016-07-29	52.5699	1	7	165	65	23.8751	46593	1	3	2	6	2	1	0	131	38.4	16.49	1	11.03	0	1	2016-07-22	250	60	0	1	0	2	3	2	5	220	5	1	1	1	2	2	0	0	4.5	2	13	0	0	2
王克能	1	2016-12-02	2016-12-27	53.1836	1	19	173	80	26.7299	55327	1	2	2	6	3	1	0	137	38.9	13.5	1	17.28	0	2	2016-12-08	245	100	0	1	0	2	4	3	5	190	5	2	1	1	3	2	0	0	5	2	15	0	0	2
黄荣桂	2	2015-06-08	2015-07-01	57.9151	1	13	155	53	22.0604	39763	1	2	2	6	2	1	0	121	44.5	0.2	0	3.47	0	1	2015-06-18	275	100	0	1	1	2	5	3	6	200	4	2	2	1	3	2	0	0	4	3	15	0	0	2
程保年	1	2016-01-12	2016-01-21	59.0712	1	7	159	57	22.5466	42672	1	2	2	6	2	1	0	123	45.1	3.2	0	15.42	0	1	2016-01-14	190	120	0	1	0	2	3	2	4	180	4	1	1	1	2	2	0	0	3.5	2	12	0	0	2
谢忠轮	1	2017-04-27	2017-05-17	60.7644	1	15	176	73	23.5666	44347	1	1	2	6	2	1	0	152	46.3	4.21	0	7.34	0	1	2017-05-02	145	50	0	1	0	2	5	5	7	300	5	3	3	2	3	2	0	0	4	1	18	0	0	2
尹雷	1	2016-09-20	2016-10-08	60.9452	1	12	173	72	24.0569	51390	1	2	2	6	3	1	0	143	43.4	1.9	0	24.41	0	2	2016-09-26	210	100	0	1	0	2	3	2	6	220	6	1	1	1	2	2	0	0	3.5	2	15	0	0	2
张其彪	1	2017-02-07	2017-02-24	61.6082	1	11	170	68	23.5294	58211	1	2	2	6	3	1	0	140	39	23.74	1	61.6	1	2	2017-02-13	255	100	0	1	0	2	4	3	7	200	7	2	1	1	3	2	0	0	4.5	2	12	0	0	2
王炳里	1	2016-01-09	2016-01-25	61.8466	1	12	170	79	27.3356	40338	1	2	2	6	2	1	0	134	41.5	2.81	0	6.42	0	1	2016-01-13	270	100	0	1	1	1	5	3	5	200	6	3	2	1	3	2	0	0	5	2	11	0	0	2
吴广江	1	2015-06-24	2015-07-11	62.5534	1	8	168	69	24.4473	41552	1	2	2	6	2	1	0	167	46.6	4.07	0	6.49	0	1	2015-07-03	175	80	0	1	1	2	2	2	7	200	8	2	1	1	2	2	0	0	3	1	12	0	0	2
王立贵	1	2015-10-07	2015-11-02	63.926	1	19	175	74	24.1633	48509	1	2	2	6	2	1	0	162	42.4	2.32	0	7	0	1	2015-10-14	160	60	0	1	0	2	4	3	5	240	6	2	1	1	3	2	0	0	4.5	1	12	0	0	2
汪香兰	2	2017-02-16	2017-02-27	65.1918	1	7	150	49	21.7778	50041	2	3	3	6	3	1	0	122	45.2	5.6	1	12.68	0	2	2017-02-20	160	50	0	1	0	2	4	3	5	220	5	2	1	1	3	2	0	0	3	2	18	0	0	2
张绍峰	1	2016-12-09 15:06:00	2016-12-23 10:03:00	66.2767	1	8	160	67	26.1719	47292	1	2	2	6	3	1	0	155	46.2	4.92	0	15.58	0	2	2016-12-15	130	50	0	1	0	2	6	4	6	200	7	2	2	1	3	2	0	0	4.6	2	18	0	0	2
祝洪堂	1	2015-06-14	2015-06-29	66.4356	1	10	172	71	23.9995	61524	1	2	3	6	2	1	0	149	41.4	9.64	1	39.84	1	1	2015-06-19	240	50	0	1	1	2	2	2	5	200	4	2	1	1	2	2	0	0	4	2	10	0	0	2
张克英	2	2016-09-19	2016-10-08	66.8137	1	12	155	64	26.6389	49394	1	2	2	6	2	1	0	115	37.4	20.5	1	8.74	0	1	2016-09-26	160	50	0	1	0	2	6	4	7	180	7	2	1	1	2	2	0	0	4	2	6	0	0	2
韩贵兰	2	2018-06-08	2018-06-22	67.1781	1	9	158	57	22.8329	44424	1	2	2	6	3	1	0	141	47.6	2.38	0	0.93	0	2	2018-06-13	160	100	0	1	1	2	3	2	5	200	4	2	1	1	2	2	0	0	4	2	13	0	0	2
乔玉传	1	2017-03-25	2017-04-11	67.3863	1	12	173	75	25.0593	40822	1	3	3	6	2	1	0	141	40.7	2.44	0	12.53	0	1	2017-03-30	165	60	0	1	0	2	4	3	6	200	5	2	1	1	3	2	0	0	2.5	2	11	0	0	2
黄国莲	2	2016-12-12	2016-12-30	67.5781	1	10	158	56	22.4323	47053	1	3	3	6	3	1	0	113	45.3	2.9	0	30.89	0	2	2016-12-20	160	50	0	1	0	2	3	2	5	200	4	1	1	1	2	2	0	0	7	3	12	0	0	2
李世银	1	2015-06-02	2015-06-17	68.4877	1	7	175	54	17.6327	47704	1	1	3	6	2	1	0	136	45.4	1.4	0	5.05	0	1	2015-06-10	190	80	0	1	0	2	4	3	5	160	5	2	1	1	2	2	0	0	3.5	2	12	0	0	2
李纯存	1	2016-06-03	2016-06-16	68.8575	1	11	174	69	22.7903	44653	1	2	3	6	3	1	0	132	44	15.41	1	15.28	0	2	2016-06-05	235	100	0	1	0	2	4	2	5	160	5	2	1	1	3	2	0	0	5	2	12	0	0	2
沈光美	2	2016-02-20	2016-03-07	69.537	2	10	160	63	24.6094	44739	1	1	2	6	2	1	0	133	43.8	1.99	0	12.13	0	1	2016-02-26	215	100	0	1	0	2	3	2	4	80	5	4	3	1	2	2	0	0	3.5	2	11	0	0	2
张宏星	1	2016-05-30	2016-06-13	69.6795	2	10	168	49	17.3611	48189	1	2	1	6	3	1	0	120	40.3	2.8	0	8.17	0	2	2016-06-03	160	50	0	1	0	2	4	3	6	200	5	2	1	1	3	2	0	0	5.5	4	24	0	0	2
何朝年	1	2016-03-29	2016-04-10	71.3452	2	9	169	58	20.3074	45924	1	3	2	6	2	1	0	119	41.3	67.1	1	261.2	1	1	2016-04-01	160	100	0	1	0	2	4	3	5	220	4	2	1	1	2	2	0	0	4	2	13	0	0	2
李邦寿	1	2016-10-15	2016-10-30	71.4932	2	11	170	54	18.6851	51695	1	2	2	5	3	1	0	125	40.4	2.9	0	8.17	0	2	2016-10-19	180	100	0	1	1	2	3	3	5	180	4	2	1	1	3	2	0	0	5.5	2	20	0	0	2
宋法广	1	2017-02-03	2017-02-19	71.8082	2	11	165	62	22.7732	50439	1	2	2	6	3	1	0	122	39.8	2.7	0	15.04	0	2	2017-02-08	200	100	0	1	0	2	3	3	4	180	4	1	1	1	2	2	0	0	5.8	2	16	0	0	2
张国平	1	2016-06-29	2016-07-14	74.2575	2	9	160	52	20.3125	40087	1	2	2	6	3	1	0	120	40.4	2.7	0	4.23	0	2	2016-07-05	150	80	0	1	1	2	4	3	5	180	6	2	1	1	2	2	0	0	4	2	10	0	0	2
向从友	1	2018-04-28	2018-05-17	80.7562	2	8	165	57	20.9366	42508	1	5	3	6	3	1	0	105	24.5	3.34	0	5.34	0	2	2018-05-09	195	100	0	1	1	2	4	3	5	240	7	3	2	2	3	2	0	0	5.5	4	22	0	0	2
方余庆	1	2017-09-20	2017-10-08	83.9151	2	9	170	72	24.9135	45338	1	3	3	6	3	1	0	122	41.3	2.1	0	14.09	0	2	2017-09-29	170	100	0	1	0	2	4	3	6	170	3	1	1	1	3	2	0	0	3.5	2	14	0	0	2
袁奇斌	1	2016-09-28	2016-10-18	44.0986	1	9	175	66	21.551	41386	1	2	2	6	3	1	0	136	37.8	12.96	1	10.36	0	2	2016-10-09	190	80	0	1	0	2	4	2	4	180	4	1	1	1	2	2	0	0	3	2	17	1	1	2
丁玉珍	2	2015-08-02	2015-08-17	46.1014	1	12	158	64	25.6369	49760	2	2	2	6	2	1	0	118	48.3	30.48	1	7.54	0	1	2015-08-05	200	100	0	1	0	2	4	2	9	250	8	3	2	2	3	2	0	0	4	2	18	1	1	2
马建芳	2	2017-07-20	2017-08-10	47.2301	1	26	158	66	26.4381	38713	1	1	2	6	2	2	0	133	46.4	48.18	1	96.31	1	2	2017-07-15	170	100	0	1	0	2	4	2	5	200	4	1	1	1	2	2	0	0	4	2	14	1	1	2
董翠英	2	2016-03-24	2016-04-09	53.2438	1	11	164	67	24.9108	49355	1	2	2	6	2	1	0	118	44.7	2.1	0	30.07	0	1	2016-03-29	140	50	0	1	0	2	4	2	6	200	4	2	1	1	3	2	0	0	4.5	2	13	1	1	2
时其环	2	2018-01-19	2018-02-03	53.7479	1	11	158	39	15.6225	38170	1	1	2	6	3	2	0	129	42.9	19.3	1	42.7	1	3	2018-01-23	180	80	0	1	0	2	4	3	5	180	5	2	1	1	3	2	0	0	3.5	3	17	1	1	2
陈家珍	2	2016-09-20	2016-10-03	57.0658	1	7	157	64	25.9645	41655	2	2	2	6	2	2	0	139	39.3	1.77	0	7.57	0	3	2016-09-26	220	100	0	1	1	2	2	2	4	200	4	2	2	1	2	2	0	0	5	2	18	1	1	2
李光珍	1	2015-12-02	2015-12-16	60.0438	1	8	160	48	18.75	38617	2	5	2	6	2	1	0	126	46.4	2.57	0	19.46	0	1	2015-12-08	180	50	0	1	0	2	3	2	4	150	3	2	2	1	3	2	0	0	3	2	10	1	1	2
孔令秀	2	2016-06-04	2016-06-20	60.9945	1	7	160	54	21.0938	49350	1	2	2	6	3	1	0	124	44	4.8	0	0.6	0	2	2016-06-13	150	50	0	1	1	2	3	2	4	160	4	2	1	1	2	2	0	0	6	2	18	1	1	2
吴灿兵	1	2015-03-30	2015-04-14	65.4849	1	11	169	49	17.1563	46522	1	2	2	4.5	2	1	0	133	42	6.37	1	13.47	0	1	2015-04-03	175	120	0	1	1	2	5	3	5	190	4	2	1	1	2	2	0	0	3	3	16	1	1	2
葛江红	2	2017-11-15	2017-12-09	46.5315	1	13	158	62	24.8358	50012	1	1	1	6	2	2	0	140	46.2	3.9	0	44.48	1	3	2017-11-26	190	150	0	1	0	2	2	2	4	180	3	2	2	1	2	2	0	0	6	3	12	1	2	2
章尤廷	1	2018-03-21	2018-04-14	64.6493	1	11	170	67	23.1834	41966	1	2	2	6	3	2	0	123	45.6	8.7	1	0.6	0	3	2018-04-03	145	100	0	1	0	2	5	3	5	250	4	2	2	1	2	2	0	0	4.5	2	18	1	2	2
王秀玲	2	2016-06-16	2016-06-30	68.4493	1	8	156	60	24.6548	40862	1	2	2	6	3	2	0	112	47.3	46.2	1	18.78	0	3	2016-06-22	285	100	0	1	0	2	6	4	5	200	5	2	2	1	3	2	0	0	4.5	2	12	1	2	2
黄永侠	1	2017-10-19	2017-11-02	72.2055	2	9	160	52	20.3125	43044	1	2	1	6	2	2	0	117	35.3	1.73	0	23.89	0	3	2017-10-24	180	80	0	1	0	2	3	2	5	150	4	2	2	1	2	2	0	0	4	2	14	1	2	2
聂士俊	2	2016-03-04	2016-03-17	52.2082	1	9	160	65	25.3906	42386	2	4	2	6	2	1	0	115	46.4	2.46	0	7.56	0	1	2016-03-08	150	80	0	1	0	2	4	3	5	100	4	2	2	1	2	2	0	0	3	2	13	1	3	2
吕树美	2	2015-12-08	2015-12-24	55.1699	1	13	152	63	27.268	47991	1	2	2	6	2	2	0	129	41.5	6.4	1	94.46	1	2	2015-12-11	200	80	0	1	0	2	3	3	6	220	5	1	1	1	2	2	0	0	5	3	15	1	3	2
石荒保	1	2017-01-05	2017-01-17	61.8575	1	7	170	67	23.1834	44085	1	3	3	6	3	1	0	131	42.3	8.8	1	40.13	1	2	2017-01-10	180	100	0	1	0	2	4	3	5	160	5	2	1	1	3	2	0	0	3.5	2	19	1	3	2
周克云	2	2017-12-01	2017-12-14	47.5808	1	8	167	65	23.3067	40921	1	1	1	6	2	1	0	115	44.3	1.09	0	7.24	0	1	2017-12-06	140	50	0	1	0	2	4	2	5	160	3	2	2	1	2	2	0	0	3.8	3	17	1	4	2
于玖琳	1	2015-10-15	2015-11-02	55.937	1	10	165	62	22.7732	40841	2	2	2	6	2	1	0	122	38.2	3.7	0	18.49	0	1	2015-10-23	190	60	0	1	0	2	4	3	6	170	6	2	1	1	3	2	0	0	6.5	2	12	0	0	2.1
王玉爱	2	2017-09-09	2017-09-25	65.0027	1	8	162	49.5	18.8615	46508	1	3	3	6	2	1	0	104	46.3	1.95	0	7.71	0	2	2017-09-17	195	100	0	1	0	1	4	3	5	200	5	2	1	1	2	2	0	0	4	2	12	0	0	2.2
朱水根	1	2015-01-09	2015-01-23	74.074	2	9	171	54	18.4672	51662	1	3	2	5	2	2	0	142	44.3	16.4	1	13.83	0	2	2015-01-14	325	150	0	1	1	2	5	3	6	180	5	3	3	2	3	2	0	0	4	2	9	0	0	2.2
张尧艾	1	2017-05-24	2017-06-05	68.8219	1	9	168	56	19.8413	46904	1	2	2	6	2	1	0	135	42.4	3.93	0	42.58	1	1	2017-05-27	160	50	0	1	1	2	5	3	5	180	4	3	2	2	3	2	0	0	3	3	12	1	1	2.3
夏成玉	1	2016-06-17	2016-06-29	56.8329	1	8	168	49	17.3611	48546	1	2	2	5	3	1	0	140	39.7	1.02	0	3.21	0	2	2016-06-21	180	120	0	1	1	2	3	2	5	220	4	1	1	1	2	2	0	0	3	2	11	0	0	2.4
童文斌	1	2017-01-09	2017-01-22	67.0685	1	10	174	85	28.075	44183	2	1	2	6	2	2	0	128	37.5	0.9	0	10.67	0	3	2017-01-12	160	100	0	1	0	2	5	3	5	200	3	2	1	1	3	2	0	0	5	2	16	1	1	2.4
张广华	1	2016-10-28	2016-11-12	38.1014	1	7	168	57	20.1956	34307	1	2	2	6	3	1	0	134	41.8	1.82	0	26.44	0	2	2016-11-05	150	50	0	1	0	2	5	3	4	140	3	1	1	1	2	2	0	0	5	2	10	0	0	2.5
陈刚	1	2018-03-14	2018-03-27	53.7315	1	7	175	69	22.5306	45314	1	1	2	6	3	1	0	135	39	8.8	1	15.47	0	2	2018-03-20	180	100	0	1	0	2	5	3	5	220	6	3	2	1	3	2	0	0	5.5	2	15	0	0	2.5
缪东生	1	2016-09-21	2016-10-08	57.789	1	12	168	57	20.1956	47217	1	2	2	6	2	1	0	142	47	2.13	0	25.96	0	1	2016-09-26	170	50	0	1	0	2	4	3	6	200	5	1	1	1	3	2	0	0	2	2	15	0	0	2.5
胡明秀	2	2017-06-28	2017-07-15	61.3507	1	11	160	67	26.1719	44196	1	2	2	6	2	1	0	125	44.9	1.9	0	11.96	0	1	2017-07-04	150	50	0	1	0	2	5	3	8	220	6	2	1	1	3	2	0	0	5	2	17	0	0	2.5
袁之树	1	2018-02-20	2018-03-10	64.4904	1	14	168	68	24.093	46630	1	2	2	6	3	1	0	117	43.4	2.34	0	10.55	0	2	2018-02-24	240	80	0	1	0	2	5	3	6	160	7	1	1	1	3	2	0	0	5	2	12	0	0	2.5
毕井生	1	2016-06-19	2016-06-29	68.5781	1	7	172	64	21.6333	42319	1	2	2	6	3	1	0	141	40.3	5.4	1	18.12	0	2	2016-06-22	160	80	0	1	0	2	3	2	4	150	4	1	1	1	2	2	0	0	5.5	2	16	0	0	2.5
崔化乘	1	2016-03-18	2016-03-30	79.1123	2	6	176	92	29.7004	49730	2	3	3	6	2	1	0	129	41.2	3.9	0	15.51	0	1	2016-03-24	180	60	0	1	0	2	3	2	5	180	5	1	1	1	2	2	0	0	4	2	10	0	0	2.5
姜仁俊	1	2015-11-29	2015-12-11	43.3014	1	9	176	64	20.6612	42220	1	1	1	6	2	2	0	150	40.9	35.15	1	15.33	0	3	2015-12-02	170	100	0	1	0	2	4	3	4	160	4	1	1	1	2	2	0	0	5.5	2	17	1	1	2.5
高成年	1	2016-03-24	2016-04-08	79.9699	2	8	178	65	20.5151	40507	1	4	3	6	2	2	0	117	32.9	2.5	0	16.38	0	3	2016-03-31	160	100	0	1	0	2	3	2	4	180	5	1	1	1	2	2	0	0	5	2	12	1	2	2.5
马明闩	1	2015-10-07	2015-10-28	59.1863	1	15	170	56	19.3772	41018	1	2	2	6	2	1	0	127	42.8	7.52	1	8.8	0	1	2015-10-13	170	100	0	1	0	2	5	3	6	200	6	2	1	1	3	2	0	0	5.5	2	15	1	3	2.5
苏光凤	2	2016-06-27	2016-07-15	59.4849	1	13	147	53	24.5268	54780	2	4	2	6	2	2	0	111	39.9	5.5	1	14.06	0	2	2016-07-02	190	80	0	1	0	2	4	2	9	300	4	3	3	1	3	2	0	0	4.5	2	13	1	3	2.5
魏如群	2	2015-10-22	2015-11-01	51.2959	1	8	165	57	20.9366	45177	1	2	2	6	2	1	0	119	44.1	1.87	0	6.64	0	1	2015-10-24	150	150	0	1	0	2	3	2	5	400	5	1	1	1	2	2	0	0	5.5	2	14	0	0	2.8
康克仕	1	2016-11-28	2016-12-13	65.7014	1	8	168	56	19.8413	44657	1	2	2	6	3	1	0	145	40.6	1.74	0	10.29	0	2	2016-12-05	170	100	0	1	0	2	5	3	5	250	4	2	1	1	3	2	0	0	4	2	18	0	0	2.8
杨学荣	1	2017-02-14	2017-03-06	71.0795	2	13	170	60	20.7612	48944	1	3	3	6	3	1	0	145	38.4	2.12	0	10.37	0	2	2017-02-21	180	80	0	1	0	2	5	4	7	220	6	2	2	1	4	2	0	0	7	2	16	0	0	2.8
方彬	1	2016-06-11	2016-06-20	40.0219	1	6	170	63	21.7993	40905	1	1	1	6	3	1	0	140	42.8	3.85	0	60.42	1	2	2016-06-14	160	80	0	1	0	2	3	2	5	200	5	1	1	1	2	2	0	0	5	4	20	0	0	3
台建付	1	2016-02-13	2016-03-04	58.1315	1	14	165	62	22.7732	55391	1	1	2	6	2	1	0	118	38	7.08	1	8.54	0	1	2016-02-19	190	80	0	1	0	2	3	3	7	250	6	2	1	1	3	2	0	0	6	2	17	0	0	3
郭玉香	2	2016-12-29	2017-01-11	56.3863	1	7	162	54	20.5761	42123	1	2	2	5	1	1	0	143	39	1.43	0	6.88	0	1	2017-01-04	240	50	0	1	1	2	3	2	5	200	5	1	1	1	2	2	0	0	5	2	15	1	1	3
苏有传	1	2015-06-04	2015-06-19	80.7863	2	11	172	57	19.2672	44809	1	2	2	6	2	1	0	135	39.6	6.6	1	8.36	0	1	2015-06-08	160	100	0	1	0	2	5	3	4	160	6	2	1	1	3	2	0	0	2.5	2	18	0	0	3.2
黄南生	2	2016-06-12	2016-06-23	64.5808	1	9	160	52	20.3125	50332	1	3	3	6	2	3	1	134	46.8	3.3	0	21.21	0	3	2016-06-14	160	80	0	1	0	2	5	3	6	190	7	2	1	1	2	2	0	0	3	2	11	1	9	2
李济芳	2	2016-01-06	2016-01-21	63.8	1	10	162	58	22.1003	44486	1	1	1	5	2	2	1	137	44.5	4.5	0	10.81	0	3	2016-01-11	185	100	0	1	1	2	4	2	5	200	4	1	1	1	2	2	0	0	5	2	16	1	3	0.6
项凤琴	2	2016-12-26	2017-01-12	49.2466	1	9	156	45	18.4911	46317	1	4	2	5	3	2	1	113	46.4	3.3	0	14.32	0	3	2017-01-03	180	100	0	1	1	2	4	2	6	250	6	1	1	1	2	2	0	0	8.5	3	15	1	1	0.8
王传杨	1	2017-01-31	2017-02-13	72.2575	2	9	167	77	27.6095	63105	2	2	2	6	3	2	1	111	41.7	10.92	1	49.54	1	3	2017-02-04	270	150	0	1	0	2	4	3	5	170	5	2	1	1	3	2	0	0	3.5	2	11	1	3	0.8
陈先长	1	2016-03-06	2016-03-14	45.674	1	5	170	72	24.9135	40866	1	1	2	6	2	3	1	133	44.5	4.32	0	5.33	0	3	2016-03-09	220	100	0	1	1	2	3	2	5	190	5	2	1	1	2	2	0	0	3.3	3	17	1	4	1
何平安	1	2017-01-05	2017-01-23	75.337	2	13	172	49	16.563	43752	1	3	2	5	3	1	1	114	39.5	6.72	1	4.47	0	2	2017-01-10	215	100	0	1	1	2	2	2	7	260	5	2	2	1	2	2	0	0	3	1	17	0	0	1.2
吴秀梅	2	2016-06-27	2016-07-13	35.8877	1	11	155	52	21.6441	33504	1	2	2	6	3	3	1	97	43.3	1.1	0	21.45	0	3	2016-07-02	270	100	0	1	1	2	3	2	5	240	5	1	1	1	2	2	0	0	4.7	3	13	1	3	1.2
杨爱枝	2	2017-03-01	2017-03-17	75.0904	2	11	160	57	22.2656	45004	1	3	3	6	3	2	1	150	43	4.4	0	22.06	0	3	2017-03-06	180	100	0	1	0	2	5	3	6	220	5	2	1	1	3	2	0	0	7	1	15	1	3	1.5
龚义霞	2	2016-06-20	2016-07-08	48.5014	1	11	163	66	24.841	48224	1	2	2	6	3	2	1	127	41.4	66.3	1	290.4	1	3	2016-06-27	145	60	0	1	0	2	5	3	7	220	7	2	1	1	3	2	0	0	4	2	14	1	6	1.5
秦金枝	2	2016-05-28	2016-06-14	58.4301	1	14	160	72	28.125	45932	1	3	2	6	3	2	1	110	37.1	3.2	0	10.12	0	3	2016-05-31	185	100	0	1	0	2	5	3	7	220	5	2	2	1	4	2	0	0	6.5	1	14	1	2	1.6
刘方珍	2	2015-09-29	2015-10-21	64.811	1	13	155	53	22.0604	48249	1	2	2	5	2	2	1	132	39.2	16.2	1	27.97	0	3	2015-10-08	190	100	0	1	1	2	3	2	7	180	7	1	1	1	2	2	0	0	2.5	2	17	1	1	1.8
王万明	1	2017-03-07	2017-03-23	50.2164	1	9	171	77	26.3329	54267	1	2	2	6	3	2	1	124	42.2	4.83	0	204.3	1	3	2017-03-14	260	120	0	1	0	2	4	3	6	220	5	2	1	1	3	2	0	0	5	2	12	1	4	1.8
张锡祥	1	2016-07-19	2016-08-04	69.5945	2	12	172	60	20.2812	46221	1	2	2	6	3	3	1	124	42.5	6.47	1	5.49	0	3	2016-07-23	180	100	0	1	0	2	4	3	6	200	6	2	1	1	3	2	0	0	4	2	19	1	7	1.8
余道香	1	2016-01-29	2016-02-11	49.9863	1	9	168	61	21.6128	42944	1	1	2	6	2	1	1	118	43.2	1.4	0	6.51	0	3	2016-02-02	255	120	0	1	1	2	4	3	4	220	3	2	1	1	3	2	0	0	4	3	13	0	0	2
司守青	1	2016-03-23	2016-04-07	47.8767	1	9	166	63	22.8625	46851	1	2	2	6	2	2	1	143	44	7.17	1	33.85	0	3	2016-03-29	230	120	0	1	0	2	2	2	6	200	6	1	1	1	2	2	0	0	5	2	16	1	2	2
韩延社	1	2015-01-27	2015-02-12	48.4986	1	8	168	58	20.5499	45425	1	1	1	6	2	2	1	120	45	3.6	0	253.2	1	3	2015-02-04	270	150	0	1	0	2	4	3	5	200	5	2	1	1	4	2	0	0	4	2	9	1	2	2
夏家丁	1	2016-04-03	2016-04-18	68.5644	1	11	170	62	21.4533	38474	1	2	2	6	2	2	1	121	39.1	3.8	0	6.8	0	2	2016-04-07	145	50	0	1	0	2	4	3	6	220	5	2	1	1	2	2	0	0	6	2	16	1	3	2
李家荣	1	2016-09-20	2016-10-09	46.7918	1	16	178	77	24.3025	42750	1	2	2	6	3	3	1	70	41.5	1.91	0	5.33	0	3	2016-09-23	180	80	0	1	1	2	4	3	6	200	5	2	1	1	3	2	0	0	4	2	14	1	4	2.5
马光跃	1	2017-08-09	2017-08-28	70.6658	2	11	179	71.5	22.3152	54108	2	3	3	5	2	3	1	140	44.4	15.4	1	15.59	0	3	2017-08-17	240	80	0	1	1	2	4	3	6	240	4	2	2	1	3	2	0	0	2.6	2	12	1	3	0.6
陈锐	1	2017-11-02	2017-11-15	34.6795	1	7	175	71	23.1837	44583	1	2	2	6	3	3	1	132	46.3	6.3	1	16.62	0	3	2017-11-08	180	80	0	1	0	2	3	3	5	160	5	2	1	1	2	2	0	0	5	2	16	1	7	1.5
刘玉龙	1	2016-07-11	2016-07-24	50.674	1	9	174	73	24.1115	48512	1	2	2	6	3	3	1	146	47.4	8.8	1	27.65	0	3	2016-07-15	150	80	0	1	0	2	4	3	6	200	6	2	1	1	2	2	0	0	4	2	10	1	5	0.5
颜革命	1	2016-10-10	2016-11-01	64.5342	1	15	173	90	30.0712	56450	1	2	2	6	3	3	1	159	39.6	9.01	1	26.63	0	3	2016-10-17	360	150	0	1	0	2	5	3	7	220	4	2	1	1	3	2	0	0	5	2	16	1	10	0.5
沈天林	1	2017-08-01	2017-08-11	50.474	1	4	172	51	17.239	44330	1	2	2	4.5	3	2	1	127	48.9	7.78	1	2.62	0	3	2017-08-07	240	150	0	1	1	2	3	2	5	160	4	1	1	1	2	2	0	0	5	3	18	1	1	0.8
余以兵	1	2016-06-15	2016-06-28	53.6055	1	12	170	92	31.8339	48692	2	3	2	6	3	3	1	96	42.4	3.97	0	11.61	0	3	2016-06-16	200	100	0	1	0	2	4	3	4	170	4	1	1	1	2	2	0	0	5	2	16	1	6	0.8
周福林	1	2017-07-10	2017-07-24	47.7753	1	8	168	93	32.9507	46647	1	2	2	5.5	3	3	1	134	34.8	2.18	0	7.91	0	3	2017-07-16	395	200	0	1	1	2	2	2	5	200	4	3	3	2	3	2	0	0	5.5	2	15	0	0	1
孙向前	1	2017-08-28	2017-09-12	73.3616	2	12	171	61	20.8611	39432	1	3	3	4	3	2	1	132	43	8.49	1	20.54	0	3	2017-08-31	290	100	0	1	1	2	3	2	5	200	4	1	1	1	2	2	0	0	4	2	17	0	0	1
张本云	2	2017-08-17	2017-08-31	52.8904	1	8	160	58	22.6562	39156	1	2	2	6	3	2	1	131	46.5	24.4	1	93.54	1	3	2017-08-23	130	50	0	1	0	2	2	2	5	250	2	1	1	1	2	2	0	0	4	2	14	1	1	1
俞侯存	2	2017-08-16	2017-09-08	65.6685	1	18	155	53	22.0604	48860	1	1	1	5	3	3	1	116	48.8	5.49	1	415.9	1	3	2017-08-21	290	150	0	1	1	1	3	2	8	220	6	2	1	1	3	2	0	0	5	2	15	1	4	1
张爱琴	2	2016-08-11	2016-08-27	53.7479	1	10	165	62	22.7732	59349	2	2	2	5	3	2	1	115	40.9	2.2	0	7.82	0	3	2016-08-17	240	80	0	1	1	2	4	3	7	240	5	2	1	1	2	2	0	0	3.5	2	18	1	5	1
崔国秀	2	2015-04-09	2015-04-23	61.1342	1	9	158	74	29.6427	42776	1	2	2	5	2	3	1	133	44	2.41	0	53.89	1	3	2015-04-14	195	80	0	1	1	2	4	3	6	200	5	2	1	1	3	2	0	0	4	2	12	1	7	1
张维英	2	2017-04-19	2017-05-10	53.0438	1	15	165	71	26.079	57978	1	2	2	5	3	3	1	134	41.7	2.41	0	8.56	0	3	2017-04-25	190	100	0	1	1	2	3	3	5	220	4	2	1	1	3	2	0	0	4	3	16	1	4	1.2
洪传琴	2	2016-04-21	2016-05-06	61.926	1	10	155	52	21.6441	43946	1	2	2	6	2	3	1	135	44.8	2.77	0	17.92	0	3	2016-04-26	180	100	0	1	0	2	3	2	6	220	5	2	2	1	2	2	0	0	3	2	13	1	7	1.2
祝传伦	1	2017-03-24	2017-04-06	65.1479	1	8	172	79	26.7036	48740	1	2	2	5	3	3	1	134	42.3	1.4	0	4.37	0	3	2017-03-29	210	100	0	1	1	2	3	2	4	160	4	1	1	1	2	2	0	0	4	2	13	1	7	1.2
徐根苗	2	2018-04-18	2018-05-02	60.5288	1	9	156	46	18.902	45520	1	4	2	5	3	2	1	92	35.8	11.13	1	12.66	0	3	2018-04-23	180	100	0	1	1	2	4	3	6	250	6	3	2	2	3	2	0	0	8	2	23	1	3	1.4
陈满华	1	2017-10-17	2017-10-27	46.9507	1	8	172	61	20.6193	42374	1	2	2	6	2	3	1	131	44	2.5	0	7.56	0	3	2017-10-19	175	100	0	1	0	2	3	3	5	170	4	2	1	1	2	2	0	0	3	3	14	1	9	1.4
朱彬	1	2017-10-28	2017-11-13	44.2575	1	8	175	64	20.898	42897	1	2	2	6	3	3	1	144	45.7	3.96	0	10.38	0	3	2017-11-05	155	100	0	1	0	2	5	4	6	200	6	2	1	1	3	2	0	0	5.5	4	9	0	0	1.5
张银美	2	2018-03-10	2018-03-29	47.4548	1	14	162	71	27.0538	44176	1	2	2	6	3	2	1	127	47.5	1.55	0	6.24	0	2	2018-03-15	180	80	0	1	1	2	5	3	6	220	6	2	2	1	3	2	0	0	3.5	2	13	0	0	1.5
张立	1	2017-10-08	2017-10-21	42.6247	1	7	170	73	25.2595	43963	1	1	2	6	3	3	1	136	44.2	3.5	0	95.07	1	3	2017-10-14	260	100	0	1	1	2	3	2	4	150	4	1	1	1	2	2	0	0	5	2	20	0	0	2
蒋传荣	2	2016-12-03	2016-12-17	69.8658	2	8	160	52	20.3125	43110	1	3	3	6	3	3	1	131	42.6	8.97	1	63.16	1	3	2016-12-09	195	100	0	1	0	2	6	4	5	350	5	2	2	1	3	2	0	0	5	1	14	0	0	2
汪学义	1	2017-06-18	2017-07-03	74.726	2	11	165	57	20.9366	51180	1	3	3	6	3	2	1	127	39.9	31.6	1	8.49	0	3	2017-06-22	210	100	0	1	0	2	3	2	7	200	6	2	1	1	3	2	0	0	5	2	15	1	2	2
韩中婷	2	2017-07-10	2017-07-24	44.2959	1	12	164	94	34.9494	40959	1	1	2	5	2	2	1	125	43.8	5.6	1	7.87	0	2	2017-07-12	180	80	0	1	1	1	3	2	5	280	4	1	1	1	2	2	0	0	4.6	2	16	1	3	2
杜运中	1	2018-01-18	2018-02-05	65.5205	1	13	170	73	25.2595	42625	1	2	2	6	3	3	1	145	45.3	56.8	1	158.6	1	3	2018-01-23	240	100	0	1	0	2	4	2	6	250	6	1	1	1	2	2	0	0	4	2	12	1	3	2
彭仁青	1	2018-03-22	2018-04-05	55.0384	1	8	155	60	24.974	42818	1	1	1	6	2	3	1	148	47	2.2	0	6.47	0	3	2018-03-28	188	120	0	1	1	2	3	2	5	300	5	3	3	1	3	2	0	0	6	2	24	1	4	2
胡永峰	1	2018-02-10	2018-02-24	55.2849	1	10	170	72	24.9135	40014	1	2	2	5	3	2	1	141	45.8	5	1	15.87	0	3	2018-02-14	135	40	0	1	1	2	5	4	6	240	5	2	2	1	3	2	0	0	3.5	2	15	1	4	2
王安云	2	2017-05-22	2017-06-07	62.3918	1	7	158	48	19.2277	48458	1	4	2	6	3	3	1	107	38.6	2.66	0	10.62	0	3	2017-05-31	184	50	0	1	1	2	4	3	4	150	4	2	2	1	3	2	0	0	5	3	21	1	4	2
胡方爱	1	2017-05-28	2017-07-01	70.2438	2	29	173	68	22.7204	58198	1	2	2	6	3	3	1	128	40.1	6.9	1	13.43	0	3	2017-06-02	180	80	0	1	0	2	5	3	7	200	6	2	2	1	4	2	0	0	5	2	17	1	5	2
秦德柱	1	2017-07-16	2017-08-01	76.5973	2	8	170	61	21.1073	49015	1	2	2	6	3	3	1	139	37.8	5.3	1	15.5	0	3	2017-07-24	180	100	0	1	0	2	4	3	6	300	6	2	1	1	2	2	0	0	3.5	2	14	1	7	2
周传鲁	1	2017-04-06	2017-04-20	68.463	1	9	162	57	21.7193	43297	1	1	2	6	3	3	1	129	42.8	5.26	1	16.04	0	3	2017-04-11	120	50	0	1	0	2	4	2	4	120	4	2	2	1	2	2	0	0	4	2	16	1	5	1.8
王支道	1	2017-08-14	2017-09-07	52.4247	1	17	170	77	26.6436	46295	1	2	2	5	2	1	0	139	41.2	8	1	10.81	0	1	2017-08-21	180	100	0	1	1	2	4	2	5	180	4	1	1	1	2	1	1	1	6	2	15	0	0	2
郑小俊	1	2016-01-22	2016-02-22	56.9479	1	25	165	68	24.977	66556	1	2	2	5	2	1	0	135	36.1	11.7	1	6.45	0	1	2016-01-28	300	200	0	1	1	1	3	2	10	400	8	2	2	2	6	1	1	1	4	2	17	0	0	1.5
郭怀礼	1	2016-03-31	2016-04-21	48.8438	1	16	172	73	24.6755	46702	1	1	2	6	2	1	0	125	46.3	2.83	0	9.81	0	1	2016-04-05	240	100	0	1	0	2	5	5	9	300	7	3	3	1	7	1	1	1	4.5	2	11	0	0	2
李应贵	1	2015-09-16	2015-10-22	70.9808	2	31	163	64	24.0882	50869	1	2	2	6	2	1	0	133	42.6	3.06	0	12.31	0	1	2015-09-21	180	60	0	1	0	2	3	2	9	400	4	2	1	1	3	1	2	1	4	2	10	0	0	1.5
刘殿缇	1	2015-05-28	2015-06-12	71.6959	2	10	175	72	23.5102	43862	1	4	2	5	1	1	0	106	40.4	2.45	0	6.93	0	1	2015-06-02	240	100	0	1	1	2	5	3	6	220	5	3	1	2	4	1	7	1	3	2	12	0	0	1
葛和金	1	2017-06-23	2017-07-05	68.6082	1	8	172	50	16.901	48584	2	3	2	6	3	1	0	99	44.6	2.61	0	4.74	0	2	2017-06-27	210	100	0	1	1	2	4	3	6	180	5	2	1	1	2	1	7	1	6	2	18	0	0	1.5
杨淑芳	2	2015-01-05	2015-01-21	81.3233	2	11	156	42	17.2584	51012	1	4	3	6	2	1	0	118	40.9	27.77	1	38.15	1	1	2015-01-10	300	100	0	1	0	2	6	4	9	240	5	3	2	2	4	1	7	1	5	3	10	0	0	2
蒋翠兰	2	2017-07-12	2017-07-30	67.0575	1	11	160	62	24.2188	42549	2	3	3	6	1	1	0	131	46.4	3.22	0	25.93	0	1	2017-07-19	200	100	0	1	0	2	3	2	9	220	7	2	2	1	4	1	9	1	2.2	2	12	0	0	1
龚福田	1	2017-06-26	2017-07-12	75.5342	2	12	170	64.5	22.3183	40630	1	3	3	6	2	1	0	149	44.9	2.76	0	10.95	0	1	2017-06-30	205	100	0	1	0	2	4	3	8	200	5	2	2	1	4	1	9	1	3.5	2	12	0	0	2
陈立奎	1	2017-03-03	2017-03-16	79.0247	2	8	165	67	24.6097	43662	1	4	3	6	3	1	0	89	32	13.24	1	10.12	0	2	2017-03-08	160	100	0	1	0	2	5	3	6	250	6	2	1	1	2	1	9	1	5	3	20	1	4	1
吴翠红	2	2015-09-06	2015-09-19	44.6438	1	9	160	65	25.3906	52644	1	1	2	6	2	3	1	134	43.7	1.71	0	11.18	0	3	2015-09-10	190	100	0	1	0	2	5	4	7	220	5	3	2	1	4	1	9	1	5.5	4	11	1	2	2
余明水	1	2015-01-27	2015-02-26	57.389	1	25	172	63	21.2953	62167	2	4	2	6	2	1	0	145	39.6	5.89	1	9.28	0	1	2015-02-01	380	150	0	1	1	1	4	3	10	400	8	4	3	2	4	1	13	1	6	2	13	0	0	0.9
朱长娥	2	2016-01-26	2016-02-25	36.2438	1	24	155	51	21.2279	60053	1	2	2	6	2	1	0	125	43	3.45	0	16.24	0	1	2016-02-01	225	100	0	1	0	1	5	4	7	240	3	2	2	2	3	1	13	1	6.4	2	11	0	0	2.5
朱庆宝	1	2017-07-05	2017-07-20	65.0767	1	8	170	62	21.4533	46525	1	2	2	6	3	1	0	143	43.3	2.3	0	8.87	0	2	2017-07-12	210	100	0	1	0	2	3	2	5	190	4	2	1	1	3	1	13	1	5	3	13	0	0	1.4
王家枝	2	2015-06-09	2015-06-22	57.6329	1	8	160	68	26.5625	47570	1	2	2	5	2	1	0	123	46.5	1.17	0	11	0	1	2015-06-14	180	80	0	1	1	2	4	3	7	350	5	2	1	1	2	1	13	1	5	2	12	0	0	1.5
陈方枝	2	2016-10-26	2016-11-24	46.3671	1	24	160	67	26.1719	56823	1	2	1	6	1	1	0	104	37.4	1.01	0	13.91	0	1	2016-10-31	200	100	0	1	0	2	4	2	9	200	5	2	2	1	2	1	13	1	6.5	3	19	0	0	2.1
刘金旺	1	2017-08-15	2017-08-31	47.9918	1	11	165	58	21.3039	47551	1	2	2	6	3	1	0	124	36.5	2.18	0	6.49	0	2	2017-08-20	176	80	0	1	1	2	4	3	9	300	8	3	3	2	4	1	13	1	2.4	2	15	1	2	1.6
卫冬群	1	2016-10-02	2016-10-16	48.7014	1	8	170	82	28.3737	41935	1	2	2	5.5	3	3	1	144	48.6	3.34	0	32.31	0	3	2016-10-08	210	100	0	1	1	2	3	2	7	120	7	2	1	1	2	1	13	1	3	3	15	0	0	2.5
彭梅花	2	2016-12-19	2017-01-11	62.0932	1	16	158	57	22.8329	54095	1	3	3	5	3	1	1	120	46.6	2.2	0	15	0	2	2016-12-26	180	80	0	1	1	2	4	4	9	500	8	4	2	2	5	1	13	1	2.5	2	12	1	1	0.5
崔新刚	1	2017-02-02	2017-02-19	54.0877	1	11	170	72	24.9135	47548	1	2	2	5	1	1	0	140	40	3.96	0	112.1	1	1	2017-02-08	280	100	0	1	1	2	5	3	6	200	3	2	3	1	2	1	1	2	2.3	2	12	0	0	1
戴胜如	1	2015-11-22	2015-12-15	51.926	1	13	172	73	24.6755	60898	1	2	2	6	2	1	0	137	39.1	3.7	0	2.65	0	1	2015-12-02	280	120	0	1	1	1	3	3	5	180	5	2	1	1	2	1	1	2	5	2	13	0	0	1
汤健	1	2015-11-16	2016-01-02	59.6356	1	43	170	63	21.7993	80378	2	2	2	5	2	1	0	140	38.6	3.7	0	10.1	0	1	2015-11-20	200	120	0	1	1	2	5	5	12	1000	8	3	3	2	3	1	1	2	4	2	18	0	0	1
蒋佃启	1	2015-10-26	2015-11-27	65.0164	1	25	175	74	24.1633	60537	1	1	1	5	2	1	0	135	44.2	1.5	0	3.99	0	1	2015-11-02	235	120	0	1	1	2	3	2	10	500	8	2	2	2	4	1	1	2	4	2	10	0	0	1.5
李广金	1	2016-06-22	2016-07-14	47.8521	1	17	169	79	27.6601	54713	1	2	2	6	2	1	0	138	42.6	3.3	0	6.75	0	1	2016-06-27	170	80	0	1	1	2	5	4	9	280	8	3	3	1	4	1	1	2	4	4	10	0	0	2
孔祥明	1	2018-05-15	2018-06-20	67.3753	1	30	176	66	21.3068	51663	1	3	2	6	3	1	0	136	37	3.72	0	12.98	0	2	2018-05-21	265	100	0	1	1	2	5	4	11	400	8	4	3	2	6	1	1	2	3	2	10	0	0	1
李振琴	2	2016-01-06	2016-02-02	60.0877	1	21	160	62	24.2188	79878	2	2	2	6	2	1	0	133	49.4	3.2	0	30.56	0	1	2016-01-12	275	100	0	1	0	2	5	4	11	400	7	2	3	1	2	1	1	2	2.3	2	10	0	0	1.6
金申武	1	2016-01-26	2016-02-22	64.1123	1	24	161	72	27.7767	56718	1	2	2	5	2	1	0	144	42.5	4.23	0	10.32	0	1	2016-01-29	180	50	0	1	1	2	5	4	9	340	9	2	2	2	4	1	1	2	4	2	7	0	0	2
张生发	1	2017-09-30	2017-10-26	66.126	1	18	170	76	26.2976	62915	1	2	2	6	2	1	0	125	45.9	1.1	0	10.67	0	1	2017-10-08	155	80	0	1	0	2	5	3	11	1000	7	3	2	2	3	1	1	2	3.5	2	14	0	0	3
袁华新	1	2016-09-05	2016-09-30	75.5753	2	17	175	77	25.1429	72785	1	2	2	5	3	2	1	130	43.2	2.8	0	13.51	0	3	2016-09-13	180	100	0	1	1	1	3	3	9	300	9	2	3	1	2	1	1	2	3.5	2	9	1	6	0.8
朱余田	1	2018-05-19	2018-06-06	60.2192	1	12	170	78	26.9896	48237	1	2	2	6	2	1	0	134	44.8	12.23	1	1.06	0	1	2018-05-25	150	50	0	1	0	2	5	4	9	300	10	3	2	2	4	1	2	2	4.5	2	12	0	0	2.6
夏登湖	1	2017-05-22	2017-06-20	63.1644	1	24	172	66	22.3094	44323	1	4	3	6	1	1	0	141	38.7	3.3	0	13.93	0	1	2017-05-27	285	120	0	1	0	2	5	3	9	300	8	3	3	2	4	1	3	2	1.4	2	13	0	0	2
张世芹	1	2017-02-11	2017-03-03	50.4301	1	17	170	79	27.3356	56764	1	2	2	6	2	1	0	147	42.6	21.3	1	47.3	1	1	2017-02-14	150	100	0	1	0	2	4	5	8	300	6	3	3	3	3	1	3	2	3.5	3	10	0	0	2.5
孟进根	1	2016-06-20	2016-07-04	42.611	1	11	174	62	20.4783	68087	1	2	1	6	3	3	1	139	42	3.5	0	6.81	0	3	2016-06-23	180	100	0	1	0	1	3	3	5	160	4	2	1	1	2	1	4	2	3.5	2	10	1	5	1.6
李荣华	2	2018-03-05	2018-03-26	72.8329	2	13	159	64	25.3155	52889	1	4	2	4	2	1	0	142	46.2	1.8	0	13.22	0	1	2018-03-13	150	50	0	1	1	2	4	2	6	240	4	1	1	1	2	1	5	2	4	2	12	0	0	0.6
王志成	1	2016-06-22	2016-07-11	54.337	1	14	172	77	26.0276	45260	1	2	2	6	2	2	0	146	41	1.4	0	12.93	0	2	2016-06-27	200	100	0	1	0	2	5	3	4	160	5	2	1	1	2	1	5	2	2.5	2	12	1	1	2
范和平	2	2016-07-06	2016-07-25	53.0712	1	12	162	52	19.8141	44274	1	2	2	6	3	1	0	124	45.6	3.84	0	1.98	0	2	2016-07-13	150	130	0	1	1	2	3	2	6	240	4	2	1	1	2	1	5	2	2.5	2	12	0	0	2
赵行华	2	2018-01-22	2018-02-13	42.789	1	19	162	59	22.4813	53285	1	4	2	5	2	2	0	114	39.1	11.8	1	71.84	1	2	2018-01-25	230	100	0	1	1	2	4	3	11	300	8	4	3	2	4	1	6	2	3	3	17	1	2	0.6
吴绳才	1	2015-11-13	2015-11-29	76.5507	2	12	175	74	24.1633	66201	1	2	2	5	2	1	0	126	42.7	20.33	1	11.05	0	1	2015-11-17	200	150	0	1	1	1	6	4	9	240	6	3	3	1	3	1	6	2	2	2	13	0	0	0.8
陈仕英	2	2015-04-28	2015-05-13	80.0274	2	9	155	57	23.7253	41863	1	2	2	6	2	1	0	139	40.3	6.94	1	36.07	1	1	2015-05-04	190	100	0	1	0	2	4	2	6	200	5	2	1	1	3	1	6	2	3.5	3	10	0	0	2
陆勤权	1	2015-12-23	2016-01-09	58.0137	1	11	170	81	28.0277	52375	1	1	1	5	2	1	0	143	44.6	2.5	0	15.83	0	1	2015-12-29	300	120	0	1	1	2	3	3	6	200	5	2	1	1	3	1	6	2	3.5	2	12	0	0	0.5
姚运权	1	2017-03-01	2017-03-17	73.4219	2	7	163	61	22.9591	58462	1	3	3	5	2	1	0	131	39.7	8.06	1	41.48	1	1	2017-03-10	190	80	0	1	1	1	5	4	5	170	5	2	2	1	5	1	6	2	2	2	14	0	0	1
邓仁娥	2	2015-08-18	2015-09-04	61.3589	1	15	160	42	16.4062	45063	1	3	2	5	2	2	0	97	40.7	3.21	0	4.32	0	3	2015-08-20	160	100	0	1	1	2	5	4	5	140	5	2	2	1	3	1	6	2	3	2	10	1	1	1.4
韩家启	1	2016-03-22	2016-04-08	64.5233	1	9	165	67	24.6097	43618	1	2	2	6	2	2	1	139	39.5	4	0	12.76	0	3	2016-03-30	190	80	0	1	0	2	4	3	6	200	6	2	1	1	3	1	6	2	5	3	11	1	2	2
王丙侠	2	2017-05-31	2017-06-14	51.337	1	6	162	71	27.0538	47865	2	2	2	5	3	2	1	139	50	263.81	1	4.1	0	3	2017-06-08	185	100	0	1	1	2	4	3	5	160	5	1	1	1	2	1	6	2	5.5	2	16	1	2	0.8
吕德芹	2	2017-01-09	2017-02-16	58.063	1	31	160	66	25.7812	55325	2	2	2	6	3	2	0	129	42.2	1.6	0	15.99	0	3	2017-01-16	180	100	0	1	0	2	3	2	5	160	8	1	1	1	2	1	7	2	4	2	15	1	8	1.5
叶宝书	1	2017-07-12	2017-08-18	75.4658	2	25	166	53	19.2336	80089	1	3	3	6	1	1	0	132	41.2	3.6	0	0.64	0	1	2017-07-24	180	80	0	1	0	2	4	4	9	350	7	3	3	2	3	1	9	2	3.5	2	9	0	0	2.6
王朝晖	1	2018-06-01	2018-06-14	55.4822	1	8	172	62	20.9573	49360	1	2	2	6	2	1	0	158	46.7	8.1	1	355.1	1	1	2018-06-06	240	50	0	1	1	2	4	2	6	240	4	2	1	1	3	1	9	2	3	2	10	0	0	1.2
宋家乡	1	2016-12-02	2016-12-26	61.8192	1	19	172	65	21.9713	49318	1	2	2	6	2	1	0	140	43.8	3.4	0	7.71	0	1	2016-12-07	200	100	0	1	0	2	5	4	8	220	6	2	1	1	4	1	9	2	4	2	20	0	0	2
杨凤英	2	2017-12-08	2017-12-25	70.9836	2	11	150	39	17.3333	37215	1	5	3	5	2	1	0	109	40.9	3.4	0	14.32	0	1	2017-12-14	190	100	0	1	1	2	4	3	5	300	5	3	2	1	5	1	9	2	5.5	2	13	1	2	0.8
杨春成	1	2017-02-23	2017-03-17	68.8959	1	14	175	80	26.1224	68945	1	2	2	6	3	3	0	144	43.4	1.1	0	9.9	0	3	2017-03-03	300	150	0	1	1	2	4	4	9	350	6	2	2	1	4	1	9	2	3	2	19	1	12	1
褚作英	2	2016-03-29	2016-05-13	80.9397	2	35	158	77	30.8444	61618	1	3	3	6	2	1	0	111	34.4	2.3	0	21.84	0	2	2016-04-08	320	150	0	1	1	2	4	4	11	500	5	2	2	1	5	1	9	2	4	2	16	0	0	1.4
陈春华	1	2017-06-09	2017-07-03	54.3178	1	17	158	54	21.6311	47274	2	4	2	6	2	1	0	114	34.4	3.24	0	12.23	0	1	2017-06-16	190	80	0	1	0	2	3	3	6	300	4	2	2	2	3	1	9	2	8.5	4	15	0	0	2
查桂虎	1	2017-12-12	2017-12-24	54.9534	1	7	170	60	20.7612	41991	1	2	2	6	3	1	0	86	38.1	3.52	0	6.59	0	2	2017-12-17	205	100	0	1	1	2	4	4	8	450	7	2	1	1	4	1	9	2	6	2	14	0	0	2
何平	1	2016-12-20	2017-01-14	49.9534	1	23	173	77	25.7276	61405	1	2	2	6	3	3	1	153	47.7	6	1	38.46	1	3	2016-12-22	170	80	0	1	0	2	4	5	9	300	8	2	2	2	6	1	9	2	2.5	2	17	1	9	2
杨学理	1	2015-06-10	2015-07-02	65.0329	1	15	173	67	22.3863	56512	1	2	2	4.5	2	2	0	138	38.7	3	0	4	0	2	2015-06-17	260	120	0	1	1	2	2	2	6	200	6	1	1	1	2	1	13	2	1.5	3	10	1	1	1
尹德林	2	2016-07-04	2016-07-29	45.3068	1	18	160	57	22.2656	55612	1	2	2	6	3	1	0	132	40.1	3.23	0	4.24	0	2	2016-07-11	150	50	0	1	1	2	4	3	6	180	8	1	1	1	3	1	13	2	4.5	2	10	1	1	1
冯玉存	1	2017-06-19	2017-07-16	52.3973	1	21	168	74	26.2188	49962	1	2	2	6	3	1	0	152	40.2	10.7	1	13.82	0	2	2017-06-25	260	100	0	1	0	2	5	4	9	280	5	2	3	1	2	1	13	2	7	3	15	0	0	1.6
王传美	2	2015-06-03	2015-07-14	58.9233	1	27	150	47	20.8889	63691	1	3	3	5	2	1	0	112	41.2	2.4	0	8.33	0	1	2015-06-17	240	120	0	1	1	2	4	3	9	200	7	2	1	1	4	1	13	2	5	2	15	0	0	2
张学刚	1	2017-11-30	2017-12-12	45.5945	1	10	164	75	27.8852	51244	1	2	2	5	2	1	0	128	43.2	0.91	0	8.73	0	1	2017-12-02	245	100	0	1	1	2	4	3	5	200	5	2	1	1	3	1	1	3	3	4	19	0	0	0.8
黄振兴	1	2018-05-25	2018-06-12	73.4712	2	12	166	68	24.677	82637	1	4	2	6	3	2	0	135	38.1	5.15	1	42.27	1	3	2018-05-31	220	150	0	1	1	2	4	4	10	300	8	4	3	3	5	1	1	3	5	2	12	1	2	2
程贞文	1	2017-10-03	2017-10-31	52.8219	1	20	175	61	19.9184	48532	1	2	2	6	1	1	0	138	41.1	2	0	7.29	0	1	2017-10-11	210	100	0	1	0	2	6	4	8	320	5	3	2	2	5	1	3	3	1	2	12	0	0	2
郑朗	1	2015-01-23	2015-02-09	46.4411	1	13	170	76	26.2976	58033	1	1	1	5	2	1	1	128	50.4	1.73	0	7.53	0	1	2015-01-27	255	100	0	1	1	2	4	4	9	300	8	3	2	2	4	1	9	3	5	3	19	0	0	1.2
王晋芬	2	2017-11-09	2017-12-04	71.3123	2	18	155	63	26.2227	73414	1	3	3	5	2	1	0	108	40.1	0.38	0	2.67	0	1	2017-11-16	230	150	0	1	1	2	9	3	9	350	8	3	2	2	4	1	4	4	1	2	18	0	0	1
刘士业	1	2016-09-18	2016-10-12	74.9918	2	18	172	61	20.6193	115025	2	4	3	6	2	1		124	46.3	3.21	0	15.66	0	1	2016-09-24	210	40	0	1	0	1	4	3	10	300	7	2	2	2	3	1	1	5		2	16		0	1.4
江太望	1	2017-08-28	2017-09-17	74.4904	2	17	169	40	14.0051	103001	1	5	2	6	3	2		109	42.7	6	1	30.22	0	3	2017-08-31	170	100	0	1	0	1	3	2	11	500	8	2	2	1	1	1	1	5		2	14		0	1.2
刘广舟	1	2016-09-26	2016-12-19	66.5918	1	82	160	57	22.2656	365525	1	2	2	6	2	3		123	43.2	2.2	0	12.23	0	3	2016-09-28	165	60	0	1	0	1	5	3	10	1000	10	3	2	2	4	1	1	5		2	13		10	1
[truncated: 22 more columns]
